# Supplementary material for: Palladium-catalyzed epoxidation of olefins using electrophiles as oxidizing agents
Source: Royal Society of Chemistry journal article supplement (doi:10.1039/d4qo00732h), 2024-01-01

## Supplementary Information

### **Palladium-Catalyzed Olefin Epoxidation with Electrophilic Reagents as Oxidizing Agents**

Biao Yao,<sup>a</sup> Lujun Zhang,<sup>b</sup> Yupeng Chen,<sup>a</sup> Liren Zhang,<sup>a</sup> Wanqing Wu<sup>\*a</sup> and Huanfeng Jiang<sup>\*a</sup>

<sup>a</sup> Key Laboratory of Functional Molecular Engineering of Guangdong Province, School of Chemistry and Chemical Engineering, South China University of Technology, Guangzhou 510640, China; Email: jianghf@scut.edu.cn, cewuwq@scut.edu.cn

<sup>b</sup> High Performance Bonding and Sealing Materials Engineering Technology Research Center of Henan Province, Henan Academy of Sciences, Zhengzhou 450000, China.

## Table of Contents

|                                                                    |     |
|--------------------------------------------------------------------|-----|
| 1. General Information.....                                        | S1  |
| 2. Experimental Section .....                                      | S2  |
| 2.1 Synthesis of Substrates.....                                   | S2  |
| 2.2 Synthesis of Ligands.....                                      | S3  |
| 2.3 Optimization reaction conditions.....                          | S4  |
| 2.4 Synthesis of Products.....                                     | S11 |
| 2.5 Further Synthetic Applications.....                            | S12 |
| 2.6 Mechanism verification experiments.....                        | S13 |
| 3. NMR Spectroscopic Data.....                                     | S15 |
| 4. X-ray Crystallographic Analysis .....                           | S33 |
| 5. $^1\text{H}$ and $^{13}\text{C}$ NMR spectra of compounds ..... | S34 |

## 1. General Information

All purchased reagents and solvents were used without further purification unless otherwise noted. Analytical thin layer chromatography was performed by using commercially prepared 100-400 mesh silica gel plates (GF<sub>254</sub>) and visualization was effected at 254 nm. All the *ortho*-alkynyl phenylacetonitrile were prepared according to known procedures. All commercially available aryl alkynes were purchased from Innochem, Energy Chemical, Bidepharm. All the reaction temperatures reported are oil bath temperature. <sup>1</sup>H and <sup>13</sup>C NMR spectra were recorded using a Bruker Asend-400 spectrometer using CDCl<sub>3</sub>. The chemical shifts are referenced to signals at 0.00 and 77.0 ppm, respectively. NMR data are reported as follows: chemical shift, multiplicity (s = singlet, d = doublet, t = triplet, hept = heptet, qd = quartet of doublet, dd = doublet of doublet, td = triplet of doublet, m = multiplet, *etc.*), coupling constants (Hz) and integration. Coupling constants (*J*) were reported in Hz and referred to apparent peak multiplications. The data of HRMS was carried out on a high-resolution mass spectrometer (LCMS-ESI-TOF). GC-MS analyses were performed on a Thermo Scientific ISQ gas chromatograph-mass spectrometer at an ionization voltage of 70 eV and equipped with a DB-WAX capillary column (internal diameter: 0.25 mm, length: 30 m). IR spectra were obtained as potassium bromide pellets with a Bruker TENSOR 27 spectrometer. Chiral HPLC analyses were performed on an Agilent 1200 system.

## 2. Experimental Section

### 2.1 Synthesis of Substrates

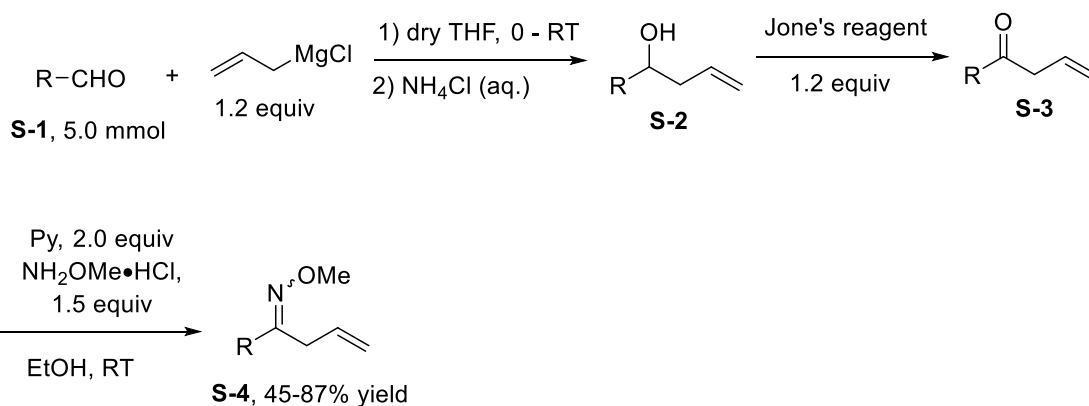

According to the known literature<sup>17,18</sup>, aldehyde **S-1** (5 mmol) was dissolved in 10 mL of dried THF in 50 mL Schlenk tube under N<sub>2</sub>. The mixture was cooled to 0 °C and Grignard reagent (1.2 equiv) was added dropwise with stirring under ice bath. Then it was allowed to warm to room temperature and stirred for 12 h. After completion, the mixture was quenched with NH<sub>4</sub>Cl (aq.). The aqueous layer was extracted with ethyl acetate (3×25 mL). The combined organic layers were dried over anhydrous Na<sub>2</sub>SO<sub>4</sub>, filtered, and concentrated under reduced pressure. The crude mixture was purified by flash column chromatography on silica gel to give the desired products **S-2**.

Products **S-2** was dissolved in 10 mL DCM in round bottom flask, Jones' reagent (1.2 equiv) was added into solution in batches with stirring under ice bath. Then it was allowed to warm to room temperature and stirred for 5 h. After completion, the aqueous layer was extracted with DCM (3×25 mL). The combined organic layers were dried over anhydrous Na<sub>2</sub>SO<sub>4</sub>, filtered, and concentrated under reduced pressure. The crude mixture was purified by flash column chromatography on silica gel to give the desired products **S-3**.

Products **S-3** was dissolved in 5 mL EtOH in round bottom flask, Py (2.0 equiv) and NH<sub>2</sub>OMe•HCl (1.5 equiv) was added into solution with stirring under room temperature. Then it was allowed to warm to room temperature and stirred for 12 h. After completion, the mixture was quenched with NaCl (aq.). the aqueous layer was extracted with EA. The combined organic layers were dried over anhydrous Na<sub>2</sub>SO<sub>4</sub>, filtered, and concentrated under reduced pressure. The crude mixture was purified by flash column chromatography on silica gel to give the desired products **S-4**.



## 2.2 Synthesis of Ligands

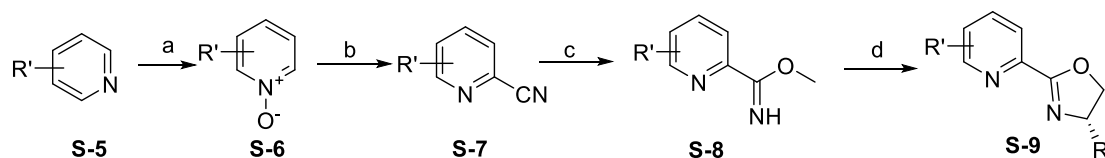

### General Procedure for the Synthesis of S-9<sup>12</sup>

(a) To a 150 mL round bottom flask with a stir bar was charged with **S-5** (15 mmol) and 30 mL DCM at 0 °C. A solution of *m*-CPBA (1.7 equiv) in 20 mL of DCM was added to reaction vial. The reaction mixture was stirred for 12 h at room temperature. Then quenched with 4.0 equiv of K<sub>2</sub>CO<sub>3</sub>, the reaction mixture was stirred for 30 minutes. To the reaction mixture was added aqueous NH<sub>4</sub>Cl (10 mL), extracted by DCM for three times, dried over Na<sub>2</sub>SO<sub>4</sub>, and evaporated in vacuum to afford the crude product, which was purified by flash chromatography on silica gel with PE/EA to give compounds **S-6**.

(b) To a 150 mL round bottom flask with a stir bar was charged with **S-6** (10 mmol), TMSCN (1.2 equiv) and 20 mL DCM at 0 °C. A solution of N, N-Dimethylaminomethyl (1.2 equiv) in 5.0 mL of DCM was added to reaction vial. The reaction mixture was stirred for 24 h at room temperature. Then quenched with aqueous K<sub>2</sub>CO<sub>3</sub>, extracted by DCM for three times, dried over Na<sub>2</sub>SO<sub>4</sub>, and evaporated in vacuum to afford the crude product, which was purified by flash chromatography on silica gel with PE/EA to give compound **S-7**.

(c) To a 50 mL round bottom flask with a stir bar was charged with **S-7** (5.0 mmol), MeONa(0.3 equiv) and 10 mL dry MeOH under N<sub>2</sub>. The mixture was stirred for 12 h at 40 °C. Then evaporated in vacuum to afford the crude product. To the crude product was added aqueous NH<sub>4</sub>Cl, extracted by EtOAc for three times, dried over Na<sub>2</sub>SO<sub>4</sub>, and evaporated in vacuum to afford the product **S-8**. No further purification is required for the next step.

(d) To a 25 mL round bottom flask with **S-8** (2.0 mmol), amino alcohol (2.0 mmol) and 5.0 mL THF. Concentrated HCl (1 drops) was added to the solution and the mixture was heated to 80 °C under N<sub>2</sub> atmosphere. After the reaction was completed, the organic solvent was removed under vacuum. The residue was purified by flash column chromatography on silica gel to afford **S-9**.

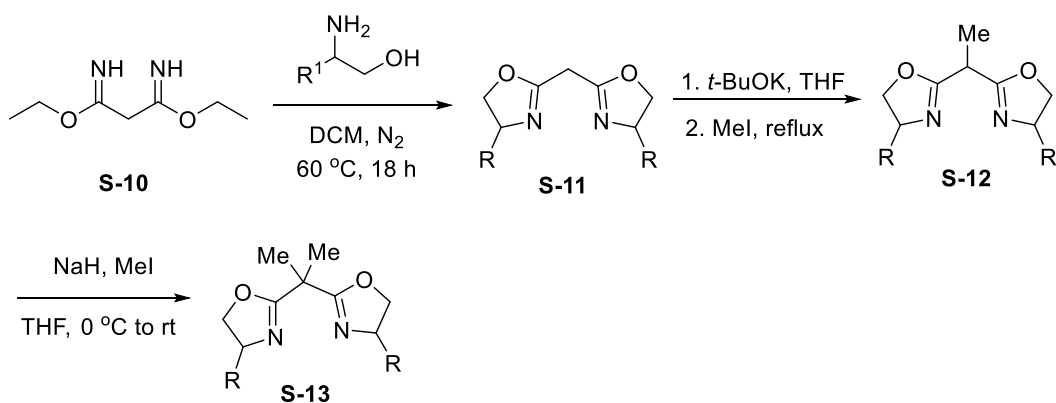

### General Procedure for the Synthesis of **S-13**<sup>19</sup>

To a 50 mL round bottom flask with **S-10** (10.0 mmol), amino alcohol (11 mmol, 1.1 equiv) and 10.0 mL dry DCM under N<sub>2</sub>. The mixture was stirred for 18 h at 60 °C. After the reaction was completed, the organic solvent was removed under vacuum. The residue was purified by flash column chromatography on silica gel to afford **S-11** (31-75% yield).

*t*-BuOK (5.0 mmol) was added to a solution of **S-11** (5.0 mmol) in 20 mL dry THF at room temperature and the mixture was stirred for 1 h under N<sub>2</sub>. Methyl iodide (10 mmol) was added S-11 and the reaction was heated to reflux for 4 h. After evaporating solvent under reduced pressure, brine (35 mL) was added to the crude product and the aqueous phase was extracted with ethyl acetate (3×50 mL). The combined organic phases were dried over Na<sub>2</sub>SO<sub>4</sub> and filtered, and evaporated in vacuum to afford the crude product, which was purified by flash chromatography on silica gel with PE/EA to give compound **S-12** (67-83% yield).

To a solution of **S-12** (3.0 mmol) in dry THF (5.0 mL) was added slowly NaH (4.5 mmol) at 0 °C under N<sub>2</sub>, then slowly add MeI (20.0 mmol) to the reaction system. After the addition was completed, the reaction mixture was allowed to reach room temperature, and the reaction was completed as monitored by TLC. The reaction was quenched by dropwise addition of water until effervescence ceased and then extracted with ethyl acetate, dried over Na<sub>2</sub>SO<sub>4</sub>, filtered and the filtrate was concentrated under reduced pressure, purified by flash column chromatography (PE/EA = 10/1) to give **S-13**(53-76% yield).

### 2.3 Optimization reaction conditions

**Table S1** The effect of solvent on the reaction

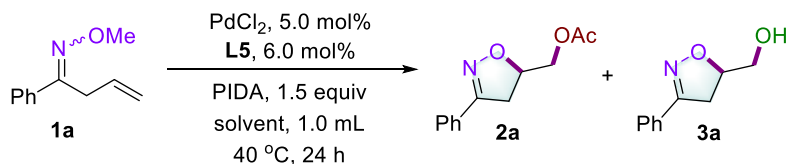

| Entry <sup>[a]</sup> | Solvent           | V:V | 2a/Yield(%) | 3a/Yield <sup>[b]</sup> (%) |
|----------------------|-------------------|-----|-------------|-----------------------------|
| 1                    | DMSO              | -   | N. D.       | N. D.                       |
| 2                    | THF               | -   | N. D.       | N. D.                       |
| 3                    | 1,4-Dioxane       | -   | N. D.       | N. D.                       |
| 4                    | DMF               | -   | N. D.       | N. D.                       |
| 5                    | MeCN              | -   | N. D.       | N. D.                       |
| 6                    | DCE               | -   | N. D.       | N. D.                       |
| 7                    | Toluene           | -   | N. D.       | N. D.                       |
| 8                    | AcOH              | -   | 43          | N. D.                       |
| 9                    | DMSO/AcOH         | 1:1 | N.D.        | 41 (0% ee)                  |
| 10                   | THF/AcOH          | 1:1 | 5           | N. D.                       |
| 11                   | 1,4-Dioxane /AcOH | 1:1 | trace       | N. D.                       |
| 12                   | DMF/AcOH          | 1:1 | trace       | N. D.                       |
| 13                   | MeCN/AcOH         | 1:1 | 41(0% ee)   | N. D.                       |
| 14                   | DCE/AcOH          | 1:1 | 12          | N. D.                       |
| 15                   | Toluene/AcOH      | 1:1 | 7           | N. D.                       |

[a] Reaction conditions: **1a** (0.3 mmol), PdCl<sub>2</sub> (5 mol%), **L5** (6.0 mol%), PIDA (1.5 equiv) in solvent 1.0 mL at 40 °C for 24 h unless otherwise noted. [b] Isolated yield. N. D = Not detected. The ee values were determined by HPLC.

**Table S2** The effect of catalysts on the reaction

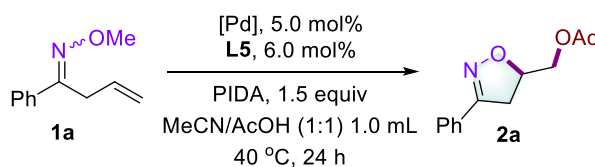

| Entry <sup>[a]</sup> | [Pd]                                  | 2a/Yield <sup>[b]</sup> (%) |
|----------------------|---------------------------------------|-----------------------------|
| 1                    | Pd(OAc) <sub>2</sub>                  | 42                          |
| 2                    | Pd(TFA) <sub>2</sub>                  | 45                          |
| 3                    | Pd(MeCN) <sub>2</sub> Cl <sub>2</sub> | 43                          |

|                |                                    |       |
|----------------|------------------------------------|-------|
| 4              | Pd(acac) <sub>2</sub>              | 29    |
| 5              | Pd <sub>2</sub> (dba) <sub>3</sub> | 62    |
| 6              | Pd(dba) <sub>2</sub>               | 67    |
| 7              | Pd(PPh <sub>3</sub> ) <sub>4</sub> | trace |
| 8 <sup>c</sup> | 10 mol% Pd(dba) <sub>2</sub>       | 75    |

[a] Reaction conditions: **1a** (0.3 mmol), [Pd] (5 mol%), **L5** (6.0 mol%), PIDA (1.5 equiv) in solvent 1.0 mL at 40 °C for 24 h unless otherwise noted. [b] Isolated yield. [c] 10 mol% Pd(dab)<sub>2</sub>, 12 mol% **L5**. N. D = Not detected.

**Table S3** The effect of Ligand on the reaction

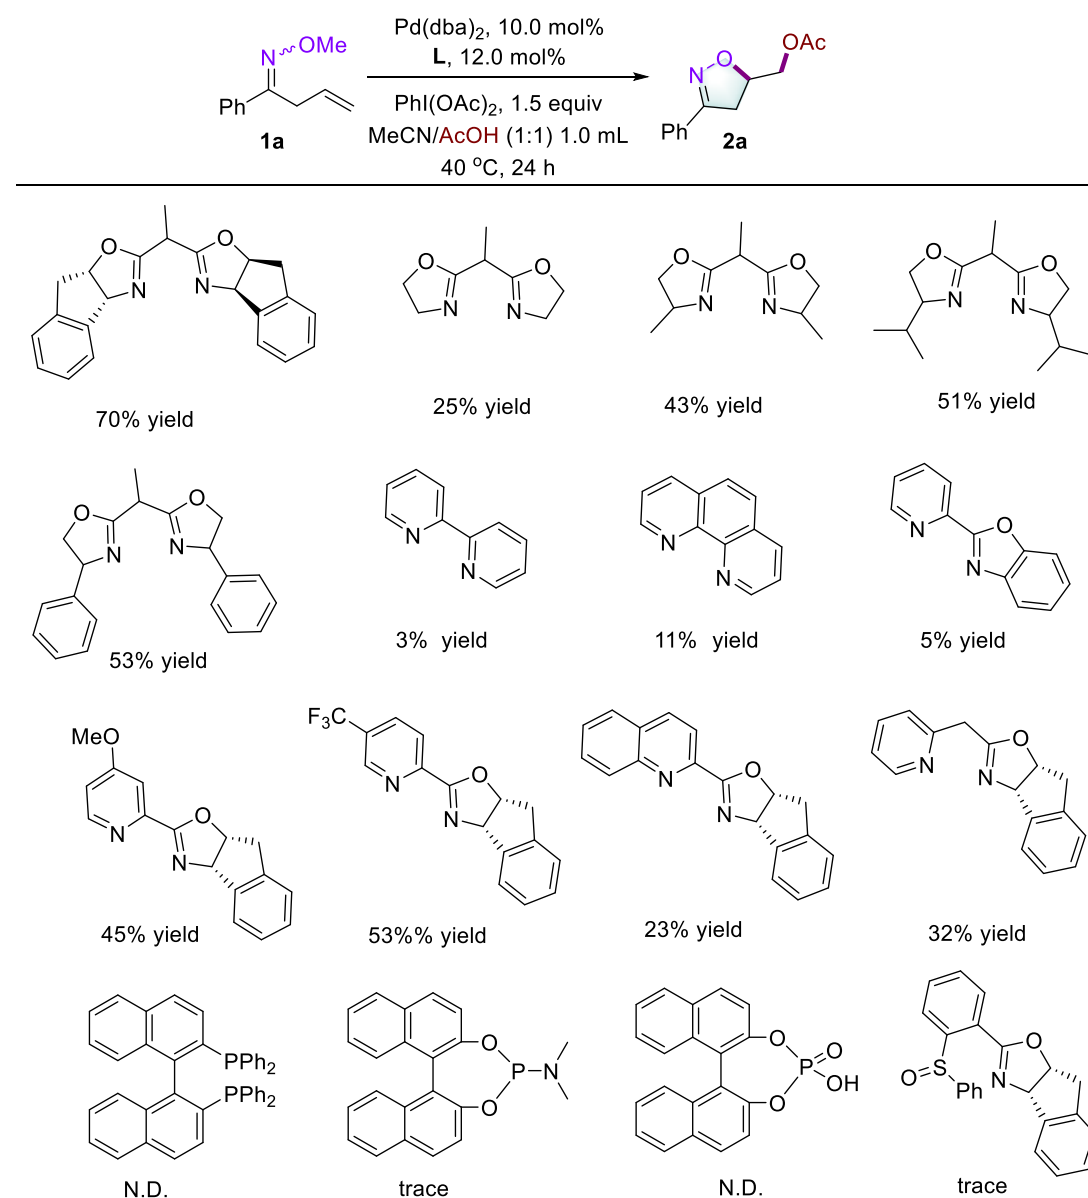

[a] Reaction conditions: **1a** (0.3 mmol), Pd(dba)<sub>2</sub> (10.0 mol%), **L5** (12.0 mol%), PIDA (1.5 equiv) in MeCN/AcOH (1:1) 1.0 mL at 40 °C for times h unless otherwise noted. [b] Isolated yield. N. D = Not detected.

**Table S4** Optimization of temperature and time conditions

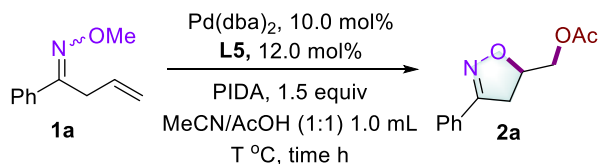

| Entry <sup>[a]</sup> | T/ <sup>o</sup> C | Time/h | 2a/Yield <sup>[b]</sup> (%) |
|----------------------|-------------------|--------|-----------------------------|
| 1                    | R.T               | 24     | 33                          |
| 2                    | 30                | 24     | 46                          |
| 3                    | 50                | 24     | 72                          |
| 4                    | 60                | 24     | 69                          |
| 5                    | 40                | 12     | 35                          |
| 6                    | 40                | 36     | 83                          |
| 7                    | 40                | 48     | 81                          |
| 8                    | 40                | 72     | 83                          |

[a] Reaction conditions: **1a** (0.3 mmol), Pd(dba)<sub>2</sub> (10.0 mol%), **L5** (12.0 mol%), PIDA (1.5 equiv) in MeCN/AcOH (1:1) 1.0 mL at T °C for times (h) unless otherwise noted. [b] Isolated yield. N. D = Not detected. R. T = Room Temperature.

**Table S5** The effect of catalysts on the reaction

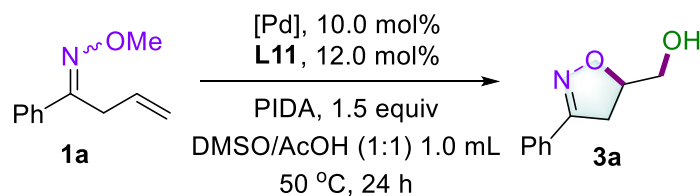

| Entry <sup>[a]</sup> | [Pd]                                  | 3a/Yield <sup>[b]</sup> (%) |
|----------------------|---------------------------------------|-----------------------------|
| 1                    | Pd(OAc) <sub>2</sub>                  | 71                          |
| 2                    | Pd(TFA) <sub>2</sub>                  | 84                          |
| 3                    | Pd(MeCN) <sub>2</sub> Cl <sub>2</sub> | 65                          |
| 4                    | Pd(acac) <sub>2</sub>                 | 53                          |
| 5                    | Pd <sub>2</sub> (dba) <sub>3</sub>    | 57                          |
| 6                    | Pd(dba) <sub>2</sub>                  | 55                          |
| 7                    | Pd(PPh <sub>3</sub> ) <sub>4</sub>    | 23                          |
| 8 <sup>c</sup>       | 10 mol% Pd(TFA) <sub>2</sub>          | 90                          |

[a] Reaction conditions: **1a** (0.3 mmol), [Pd] (5.0 mol%), **L11** (6.0 mol%), PIDA (1.5 equiv) in DMSO/AcOH 1.0 mL at 40 °C for 24 h unless otherwise noted. [b] Isolated yield. [c] 10 mol% Pd(TFA)<sub>2</sub>, 12 mol% **L11**. N. D. = Not detected.

**Table S6** The effect of Ligand on the reaction

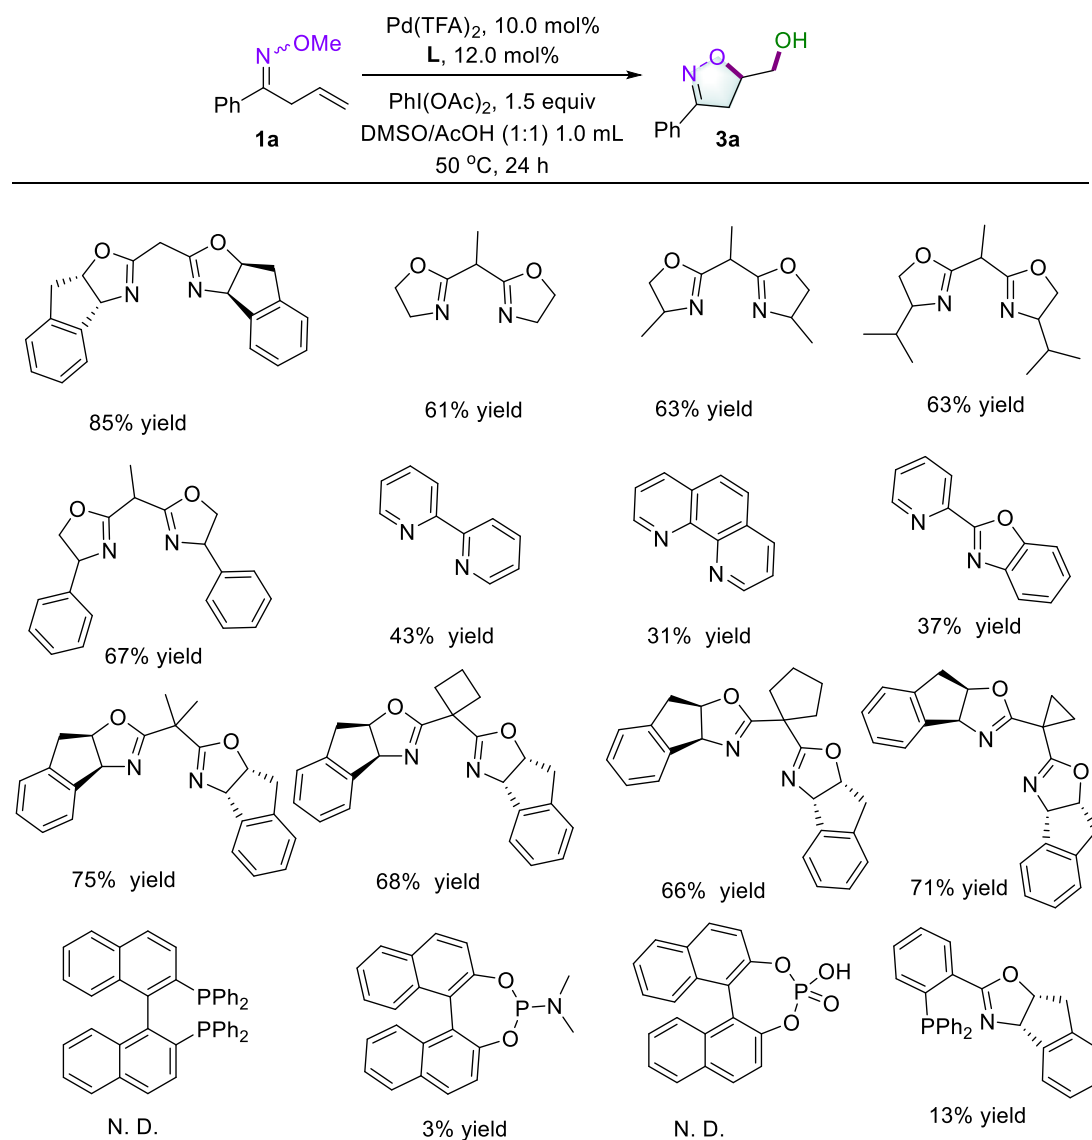

[a] Reaction conditions: **1a** (0.3 mmol), Pd(TFA)<sub>2</sub> (10.0 mol%), **L** (12.0 mol%), PIDA (1.5 equiv) in DMSO/AcOH (1:1) 1.0 mL at 50 °C for 24 h unless otherwise noted. [b] Isolated yield.

**Table S7** Optimization of temperature and time conditions

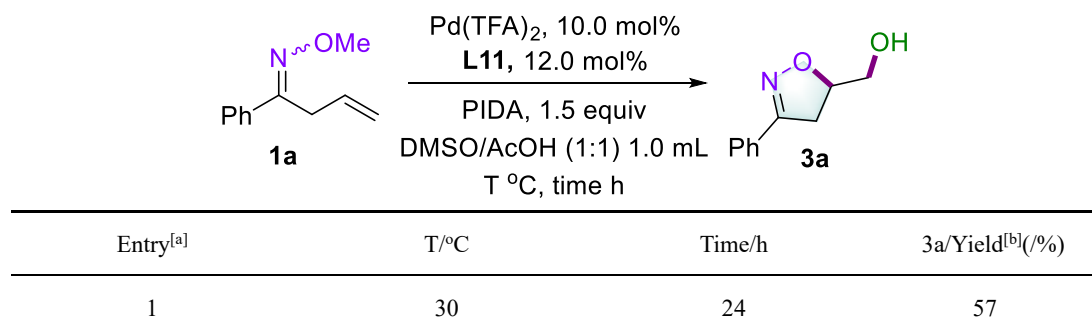

|                |    |    |    |
|----------------|----|----|----|
| 2              | 40 | 24 | 78 |
| 3              | 60 | 24 | 89 |
| 4              | 70 | 24 | 85 |
| 5              | 50 | 12 | 52 |
| 6              | 50 | 36 | 90 |
| 7              | 50 | 48 | 89 |
| 8 <sup>c</sup> | 50 | 72 | 88 |

[a] Reaction conditions: **1a** (0.3 mmol), Pd(TFA)<sub>2</sub> (10.0 mol%), **L11** (12.0 mol%), PIDA (1.5 equiv) in DMSO/AcOH (1:1) 1.0 mL at T °C for times (h) unless otherwise noted. [b] Isolated yield.

**Table S8** The effect of catalysts on the reaction

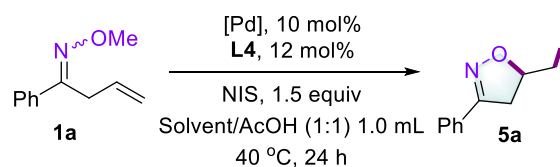

| Entry <sup>[a]</sup> | [Pd]                                  | Solvent/(1;1) | <b>5a</b> /Yield <sup>[b]</sup> (%) |
|----------------------|---------------------------------------|---------------|-------------------------------------|
| 1                    | Pd(OAc) <sub>2</sub>                  | MeCN/AcOH     | 27                                  |
| 2                    | Pd(MeCN) <sub>2</sub> Cl <sub>2</sub> | MeCN/AcOH     | 67                                  |
| 3                    | Pd(acac) <sub>2</sub>                 | MeCN/AcOH     | 49                                  |
| 4                    | Pd <sub>2</sub> (dba) <sub>3</sub>    | MeCN/AcOH     | 83                                  |
| 5                    | Pd(PPh <sub>3</sub> ) <sub>4</sub>    | MeCN/AcOH     | 14                                  |
| 6                    | 10 mol% Pd(dba) <sub>2</sub>          | DMSO/AcOH     | 13                                  |

[a] Reaction conditions: **1a** (0.3 mmol), [Pd] (10.0 mol%), **L4** (12.0 mol%), PIDA (1.5 equiv) in solvent/AcOH (1:1) 1.0 mL at 40 °C for 24 h unless otherwise noted. [b] Isolated yield.

**Table S9** The effect of Ligand on the reaction

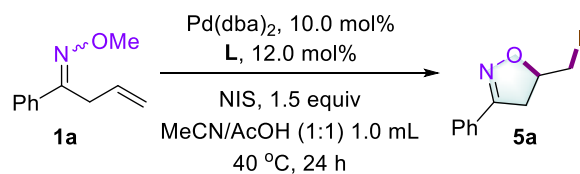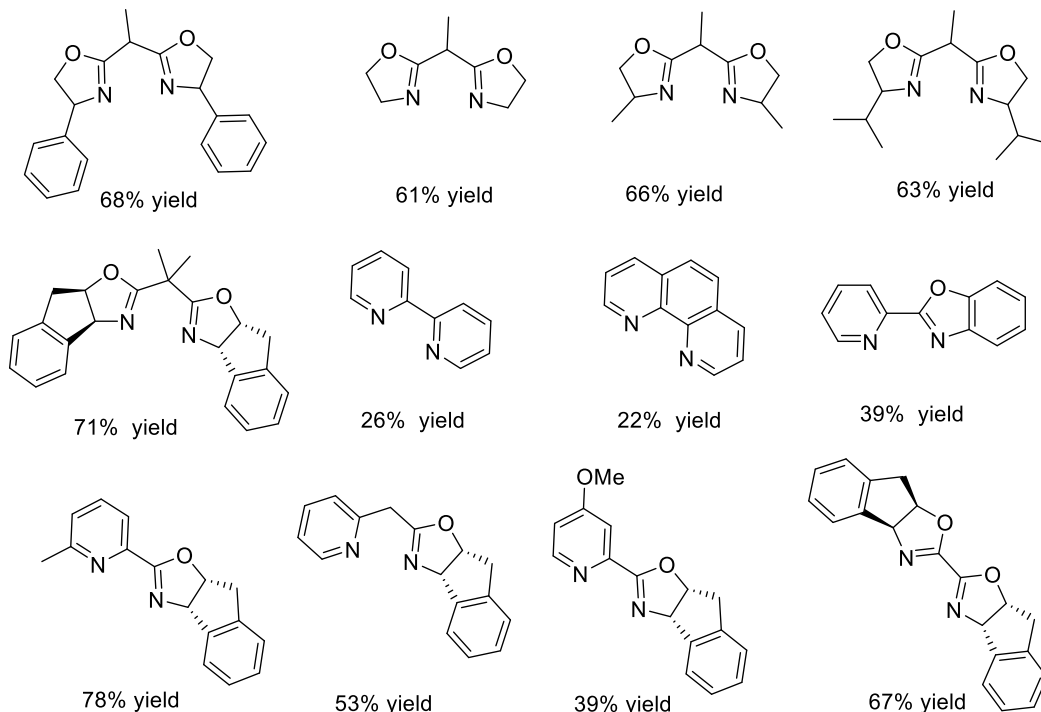

[a] Reaction conditions: **1a** (0.3 mmol), Pd(dba)<sub>2</sub> (10.0 mol%), **L** (12.0 mol%), NIS (1.5 equiv) in MeCN/AcOH (1:1) 1.0 mL at 40 °C for 24 h unless otherwise noted. [b] Isolated yield.

**Table S10** Optimization of temperature and time conditions

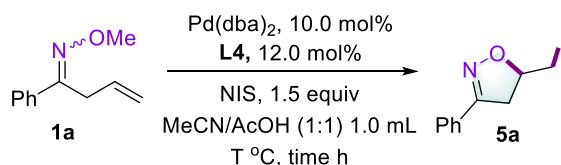

| Entry <sup>[a]</sup> | T/°C | Time/h | 3a/Yield <sup>[b]</sup> (%) |
|----------------------|------|--------|-----------------------------|
| 1                    | R. T | 24     | 79                          |
| 2                    | 50   | 24     | 80                          |
| 3                    | 60   | 24     | 69                          |
| 4                    | 40   | 12     | 71                          |
| 5                    | 50   | 36     | 94                          |
| 6                    | 50   | 48     | 95                          |

[a] Reaction conditions: **1a** (0.3 mmol), Pd(dba)<sub>2</sub> (10.0 mol%), **L4** (12.0 mol%), NIS (1.5 equiv) in MeCN/AcOH (1:1) 1.0 mL at T °C for times (h) unless otherwise noted. [b] Isolated yield. N. D = Not detected.



## 2.4 Synthesis of Products

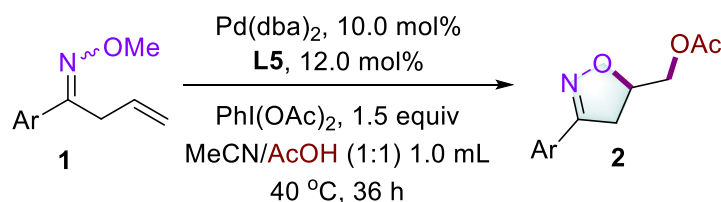

To a 25 ml reaction tube containing a stirring bar was added Pd(dba)<sub>2</sub> (10 mol%), **L5** (12 mol%) was added into 0.5 mL MeCN with stirring 10 min under room temperature. **1** (0.3 mmol), PIDA (1.5 equiv) and 0.5 mL AcOH sequentially. The tube was sealed and stirred at 40 °C for 36 h. After completion, the reaction mixture was concentrated and purified by silica gel column chromatography to provide the product **2**.

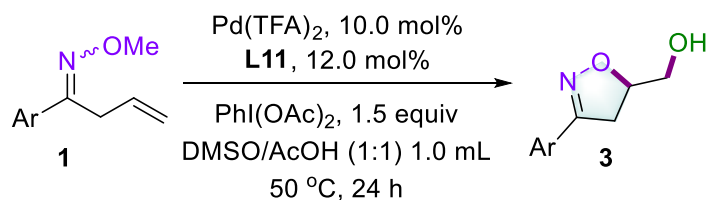

To a 25 ml reaction tube containing a stirring bar was added Pd(TFA)<sub>2</sub> (10 mol%), **L11** (12 mol%) was added into 0.5 mL DMSO with stirring 10 min under room temperature. **1** (0.3 mmol), PIDA (1.5 equiv) and 0.5 mL AcOH sequentially. The tube was sealed and stirred at 50 °C for 24 h. After completion, the reaction mixture was concentrated and purified by silica gel column chromatography to provide the product **3**.

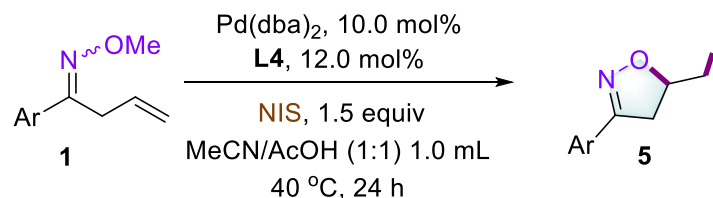

To a 25 ml reaction tube containing a stirring bar was added Pd(dba)<sub>2</sub> (10 mol%), **L4** (12 mol%) was added into 0.5 mL MeCN with stirring 10 min under room temperature. **1** (0.3 mmol), NIS (1.5 equiv) and 0.5 mL AcOH sequentially. The tube was sealed and stirred at 40 °C for 24 h. After completion, the reaction mixture was concentrated and purified by silica gel column chromatography to provide the product **5**.

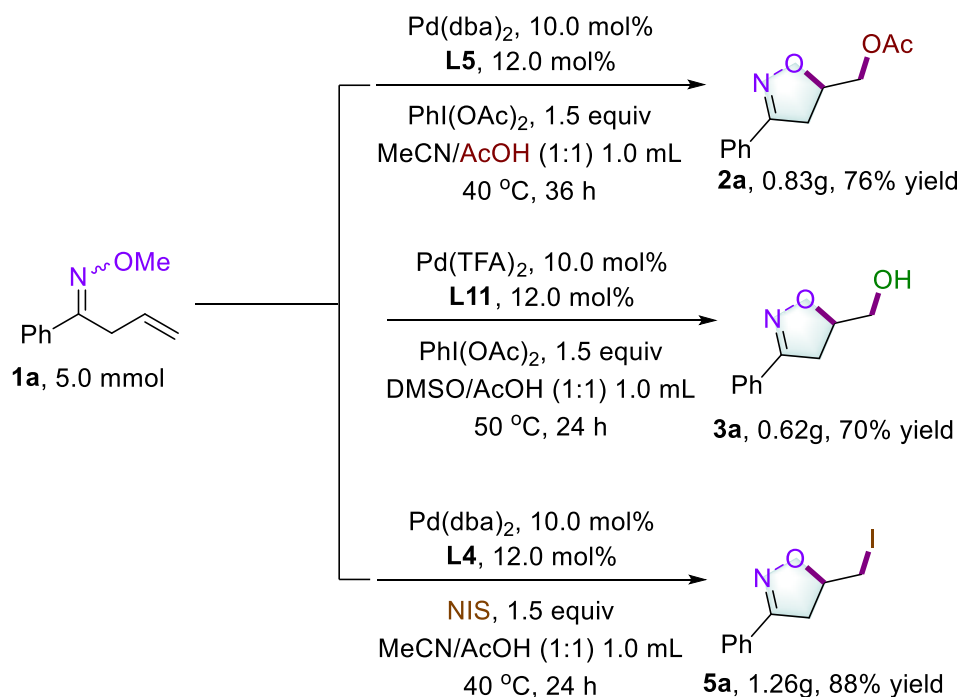

To a 100 ml round bottom flask containing a stirring bar was added  $\text{Pd}(\text{dba})_2$  (10 mol%), **L5** (12 mol%) was added into 10 mL MeCN with stirring 30 min under room temperature. **1a** (5.0 mmol), PIDA (1.5 equiv) and 10 mL AcOH sequentially. The tube was sealed and stirred at 40 °C for 36 h. After completion, the reaction mixture was concentrated and purified by silica gel column chromatography to provide the product **2a** in 76% yield (0.83g).

To a 100 ml round bottom flask containing a stirring bar was added  $\text{Pd}(\text{TFA})_2$  (10 mol%), **L11** (12 mol%) was added into 10 mL DMSO with stirring 30 min under room temperature. **1a** (5.0 mmol), PIDA (1.5 equiv) and 10 mL AcOH sequentially. The tube was sealed and stirred at 50 °C for 24 h. After completion, the reaction mixture was concentrated and purified by silica gel column chromatography to provide the product **3a** in 70% yield (0.62g).

To a 100 ml round bottom flask containing a stirring bar was added  $\text{Pd}(\text{dba})_2$  (10 mol%), **L4** (12 mol%) was added into 10 mL MeCN with stirring 30 min under room temperature. **1a** (5.0 mmol), NIS (1.5 equiv) and 10 mL AcOH sequentially. The tube was sealed and stirred at 40 °C for 24 h. After completion, the reaction mixture was concentrated and purified by silica gel column chromatography to provide the product **5a** in 88% yield (1.26g).

## 2.5 Further Synthetic Applications

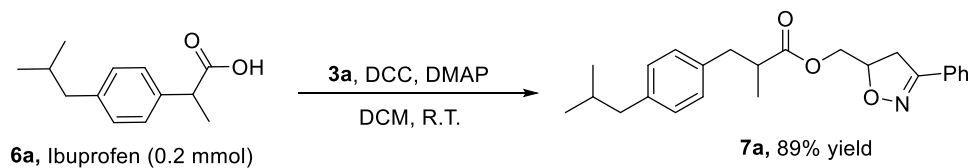

To a solution of **3a** (0.2 mmol, 1.0 equiv), DMAP (5.0 mol%) and **6a** (0.2 mmol, 1.0 equiv) in DCM (1.0 mL) was slowly added DCC (2.4 mmol, 1.2 equiv; in 1.0 mL DCM). Then, the mixture was stirred overnight at room temperature. The mixture was quenched by aq. NaCl and extracted with DCM. The organic layer was dried over Na<sub>2</sub>SO<sub>4</sub>. After completion, the reaction mixture was concentrated and purified by silica gel column chromatography to provide the product **7a** in 89% yield.

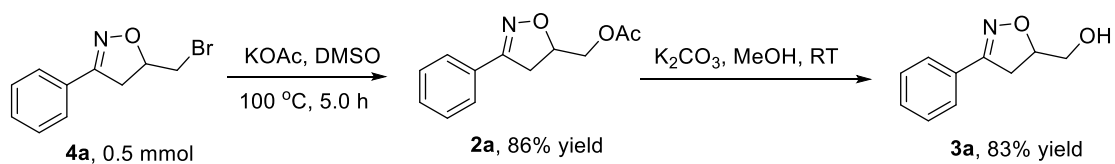

To a 25 ml reaction tube containing a stirring bar was added **4a** (0.5 mol) and KOAc (30 equiv) was added into 10 mL DMSO sequentially. The tube was sealed and stirred at 120 °C for 5 h. After completion, the reaction mixture was concentrated and purified by silica gel column chromatography to provide the product **2a** in 86% yield.

To a 25 ml reaction tube containing a stirring bar was added K<sub>2</sub>CO<sub>3</sub> (2.0 equiv), **2a** (0.3 mmol) and 5mL MeOH sequentially. The tube was sealed and stirred at room temperature for 2 h. After completion, the reaction mixture was concentrated and purified by silica gel column chromatography to provide the product **3a** in 83% yield.

## 2.6 Mechanism verification experiments

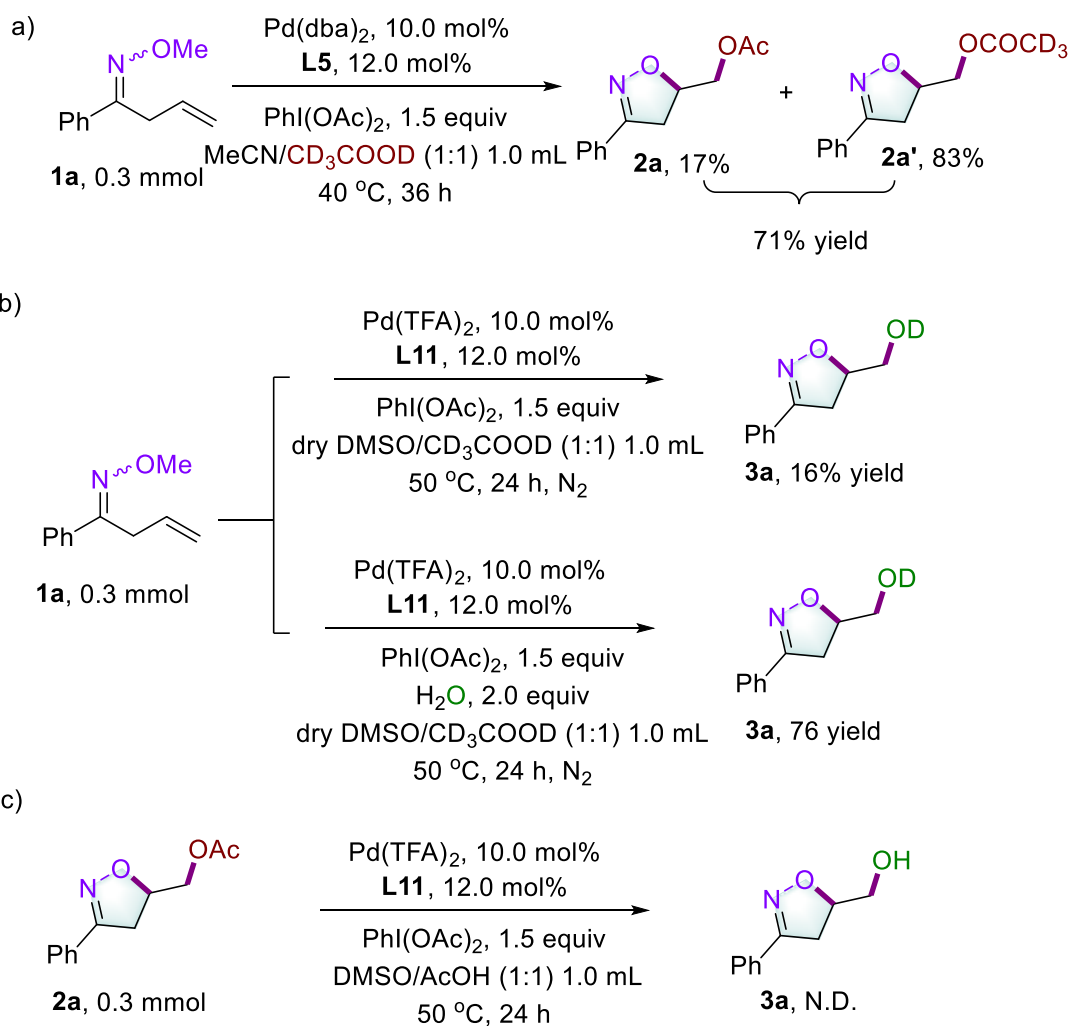

a) To a 25 ml flame-dried Schlenk tube containing a stirring bar was added  $\text{Pd}(\text{dba})_2$  (10 mol%), **L5** (12 mol%) was added into 0.5 mL MeCN with stirring 10 min under room temperature. **1a** (0.3 mmol), PIDA (1.5 equiv) and 0.5 mL  $\text{CD}_3\text{COOD}$  sequentially under  $\text{N}_2$ . The tube was sealed and stirred at 40 °C for 36 h. After completion, the reaction mixture was concentrated and purified by silica gel column chromatography to provide the product **2a/2a'** (17:83) in 71% yield.

b) To a 25 ml flame-dried Schlenk tube containing a stirring bar was added  $\text{Pd}(\text{TFA})_2$  (10 mol%), **L11** (12 mol%) was added into 0.5 mL anhydrous DMSO with stirring 10 min at room temperature under  $\text{N}_2$ . **1a** (0.3 mmol), PIDA (1.5 equiv) and 0.5 mL  $\text{CD}_3\text{COOD}$  sequentially under  $\text{N}_2$ . The tube was sealed and stirred at 50 °C for 24 h. After completion, the reaction mixture was concentrated and purified by silica gel column chromatography to provide the product **3a** in 16% yield.

To a 25 ml flame-dried Schlenk tube containing a stirring bar was added  $\text{Pd}(\text{TFA})_2$  (10 mol%), **L11** (12 mol%) was added into 0.5 mL anhydrous DMSO with stirring 10 min at room temperature under  $\text{N}_2$ . **1a** (0.3 mmol), PIDA (1.5 equiv),  $\text{H}_2\text{O}$  (2.0 equiv) and 0.5 mL  $\text{CD}_3\text{COOD}$  sequentially under

N<sub>2</sub>. The tube was sealed and stirred at 50 °C for 24 h. After completion, the reaction mixture was concentrated and purified by silica gel column chromatography to provide the product **3a** in 76% yield.

c) To a 25 ml reaction tube containing a stirring bar was added Pd(TFA)<sub>2</sub> (10 mol%), **L11** (12 mol%) was added into 0.5 mL DMSO with stirring 10 min under room temperature. **2a** (0.3 mmol), PIDA (1.5 equiv) and 0.5 mL AcOH sequentially. The tube was sealed and stirred at 40 °C for 24 h. After completion, The reaction did not detect the formation of products **3a**.

### 3. NMR Spectroscopic Data

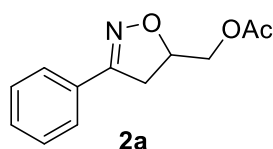

**(3-phenyl-4,5-dihydroisoxazol-5-yl)methyl acetate (2a)**. 54.6 mg, 83% yield, yellow solid, **M. P.** 79.3-82.1 °C. <sup>1</sup>H NMR (400 MHz, CDCl<sub>3</sub>) δ 7.69-7.65 (m, 2H), 7.42-7.38 (m, 3H), 5.01-4.93 (m, 1H), 4.24 (qd, *J* = 11.9, 5.0 Hz, 2H), 3.46 (dd, *J* = 16.7, 10.8 Hz, 1H), 3.16 (dd, *J* = 16.7, 7.3 Hz, 1H), 2.08 (s, 3H); <sup>13</sup>C NMR (100 MHz, CDCl<sub>3</sub>) δ 170.8, 156.2, 130.2, 129.1, 128.7, 126.6, 78.1, 64.8, 37.2, 20.7; *ν* (KBr)/cm<sup>-1</sup>: 3731.3, 2928.3, 2361.4, 1744.0, 1363.0, 1235.0, 900.5, 763.9, 691.5; HRMS (ESI) *m/z*: calcd for C<sub>12</sub>H<sub>14</sub>NO<sub>3</sub><sup>+</sup>, [M+H]<sup>+</sup>: 220.0968, found: 220.0965.

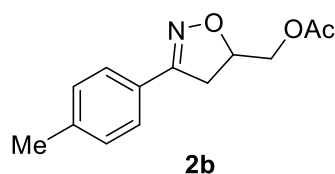

**(3-(p-tolyl)-4,5-dihydroisoxazol-5-yl)methyl acetate (2b)**. 56.7 mg, 81% yield, yellow solid, **M. P.** 89.8-91.8 °C. <sup>1</sup>H NMR (400 MHz, CDCl<sub>3</sub>) δ 7.56 (d, *J* = 8.3 Hz, 2H), 7.21 (d, *J* = 7.7 Hz, 2H), 4.98-4.91 (m, 1H), 4.23 (qd, *J* = 11.8, 5.1 Hz, 2H), 3.44 (dd, *J* = 16.7, 10.8 Hz, 1H), 3.14 (dd, *J* = 16.7, 7.2 Hz, 1H), 2.38 (s, 3H), 2.08 (s, 3H); <sup>13</sup>C NMR (100 MHz, CDCl<sub>3</sub>) δ 170.8, 156.1, 140.5, 129.4, 126.6, 126.3, 77.9, 64.9, 37.3, 21.4, 20.7; *ν* (KBr)/cm<sup>-1</sup>: 2921.9, 1739.7, 1513.4, 1446.7, 1239.9, 1045.8, 894.5, 817.1, 749.3; HRMS (ESI) *m/z*: calcd for C<sub>13</sub>H<sub>16</sub>NO<sub>3</sub><sup>+</sup>, [M+H]<sup>+</sup>: 234.1125, found: 234.1122.

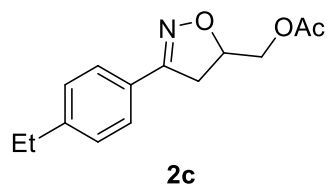

**(3-(4-ethylphenyl)-4,5-dihydroisoxazol-5-yl)methyl acetate (2c).** 57.9 mg, 78% yield, yellow solid, **M. P.** 81.2-83.8 °C. <sup>1</sup>H NMR (400 MHz, CDCl<sub>3</sub>) δ 7.59 (d, *J* = 8.3 Hz, 2H), 7.24 (d, *J* = 8.2 Hz, 2H), 4.99-4.92 (m, 1H), 4.23 (qd, *J* = 11.8, 5.1 Hz, 2H), 3.44 (dd, *J* = 16.7, 10.8 Hz, 1H), 3.14 (dd, *J* = 16.7, 7.2 Hz, 1H), 2.68 (q, *J* = 7.6 Hz, 2H), 2.08 (s, 3H), 1.25 (t, *J* = 7.6 Hz, 3H); <sup>13</sup>C NMR (100 MHz, CDCl<sub>3</sub>) δ 170.7, 156.1, 146.7, 128.2, 126.7, 126.5, 77.9, 64.8, 37.3, 28.7, 20.7, 15.3; **ν (KBr)/cm<sup>-1</sup>:** 3446.9, 2964.9, 2361.0, 1736.9, 1443.8, 1241.1, 1046.5, 898.2, 838.0, 553.7; **HRMS (ESI) m/z: calcd for C<sub>14</sub>H<sub>18</sub>NO<sub>3</sub><sup>+</sup>, [M+H]<sup>+</sup>: 248.1281, found: 248.1276.**

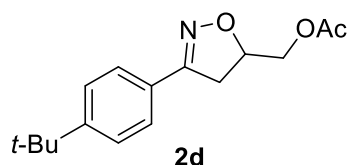

**(3-(4-(tert-butyl)phenyl)-4,5-dihydroisoxazol-5-yl)methyl acetate (2d).** 70.2 mg, 85% yield, white solid, **M. P.** 89.3-92.1 °C. <sup>1</sup>H NMR (400 MHz, CDCl<sub>3</sub>) δ 7.62-7.59 (m, 2H), 7.45-7.41 (m, 2H), 4.99-4.92 (m, 1H), 4.23 (qd, *J* = 11.8, 5.0 Hz, 2H), 3.45 (dd, *J* = 16.7, 10.8 Hz, 1H), 3.15 (dd, *J* = 16.7, 7.2 Hz, 1H), 2.08 (s, 3H), 1.33 (s, 9H); <sup>13</sup>C NMR (100 MHz, CDCl<sub>3</sub>) δ 170.7, 156.0, 153.6, 126.5, 126.2, 125.6, 77.9, 64.8, 37.3, 34.8, 31.1, 20.7; **ν (KBr)/cm<sup>-1</sup>:** 3460.7, 2960.6, 2361.5, 1743.5, 1363.1, 1236.1, 1046.3, 899.5, 832.5, 568.1; **HRMS (ESI) m/z: calcd for C<sub>16</sub>H<sub>22</sub>NO<sub>3</sub><sup>+</sup>, [M+H]<sup>+</sup>: 276.1594, found: 276.1589.**

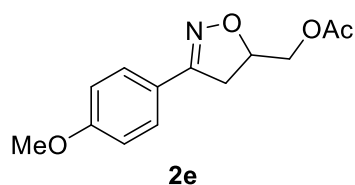

**(3-(4-methoxyphenyl)-4,5-dihydroisoxazol-5-yl)methyl acetate (2e).** 33.7 mg, 45% yield, white solid, **M. P.** 125.3-127.6 °C. <sup>1</sup>H NMR (400 MHz, CDCl<sub>3</sub>) δ 7.63-7.59 (m, 2H), 6.94-6.90 (m, 2H), 4.97-4.90 (m, 1H), 4.27-4.18 (m, 2H), 3.84 (s, 3H), 3.43 (dd, *J* = 16.6, 10.8 Hz, 1H), 3.13 (dd, *J* = 16.6, 7.2 Hz, 1H), 2.09 (s, 3H); <sup>13</sup>C NMR (100 MHz, CDCl<sub>3</sub>) δ 170.8, 161.1, 155.8, 128.2,

121.7, 114.1, 77.9, 64.9, 55.3, 37.5, 20.7;  $\nu$  (KBr)/ $\text{cm}^{-1}$ : 3434.8, 2988.8, 2362.1, 1744.5, 1603.9, 1367.3, 1243.4, 1048.6, 828.3; HRMS (ESI)  $m/z$ : calcd for  $\text{C}_{13}\text{H}_{16}\text{NO}_4^+$ ,  $[\text{M}+\text{H}]^+$ : 250.1074, found: 250.1069.

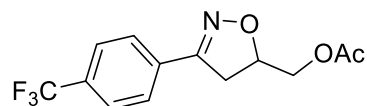

**2f**

(3-(4-(trifluoromethyl)phenyl)-4,5-dihydroisoxazol-5-yl)methyl acetate (**2f**). 31.9 mg, 31% yield, white solid, **M. P.** 88.2-90.3 °C.  $^1\text{H}$  NMR (400 MHz,  $\text{CDCl}_3$ )  $\delta$  7.71 (d,  $J = 8.2$  Hz, 2H), 7.59 (d,  $J = 8.1$  Hz, 2H), 4.99-4.92 (m, 1H), 4.24-4.13 (m, 2H), 3.40 (dd,  $J = 16.8, 11.0$  Hz, 1H), 3.11 (dd,  $J = 16.8, 7.5$  Hz, 1H), 2.01 (s, 3H);  $^{13}\text{C}$  NMR (100 MHz,  $\text{CDCl}_3$ )  $\delta$  170.7, 155.2, 132.6, 131.8 (q,  $J = 32.6$  Hz), 126.9, 125.7 (q,  $J = 3.7$  Hz), 123.7 (q,  $J = 270.6$  Hz), 78.8, 64.7, 36.8, 20.7;  $\nu$  (KBr)/ $\text{cm}^{-1}$ : 2947.7, 2394.9, 1745.3, 1407.5, 1240.1, 1165.7, 905.6, 838.9, 599.8; HRMS (ESI)  $m/z$ : calcd for  $\text{C}_{13}\text{H}_{13}\text{F}_3\text{NO}_3^+$ ,  $[\text{M}+\text{H}]^+$ : 288.0842, found: 288.0837.

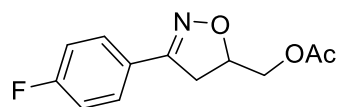

**2g**

(3-(4-fluorophenyl)-4,5-dihydroisoxazol-5-yl)methyl acetate (**2g**). 34.9 mg, 49% yield, yellow oil.  $^1\text{H}$  NMR (400 MHz,  $\text{CDCl}_3$ )  $\delta$  7.68-7.64 (m, 2H), 7.13-7.08 (m, 2H), 5.01-4.94 (m, 1H), 4.24 (qd,  $J = 11.8, 4.2$  Hz 2H), 3.44 (dd,  $J = 16.6, 10.8$  Hz, 1H), 3.14 (dd,  $J = 16.6, 7.3$  Hz, 1H), 2.09 (s, 3H);  $^{13}\text{C}$  NMR (100 MHz,  $\text{CDCl}_3$ )  $\delta$  170.8, 163.8 (d,  $J = 249.6$  Hz), 155.2, 128.6 (d,  $J = 8.3$  Hz), 125.4 (d,  $J = 3.4$  Hz), 115.9 (d,  $J = 22$  Hz), 78.3, 64.8, 37.3, 20.7;  $\nu$  (KBr)/ $\text{cm}^{-1}$ : 2921.5, 2359.8, 1742.4, 1508.6, 1237.8, 1047.1, 898.5, 832.1, 597.6; HRMS (ESI)  $m/z$ : calcd for  $\text{C}_{12}\text{H}_{13}\text{FNO}_3^+$ ,  $[\text{M}+\text{H}]^+$ : 238.0874, found: 238.0869.

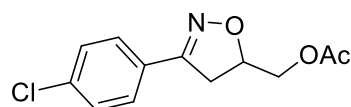

**2h**

(3-(4-chlorophenyl)-4,5-dihydroisoxazol-5-yl)methyl acetate (**2h**). 43.4 mg, 57% yield, yellow oil.  $^1\text{H}$  NMR (400 MHz,  $\text{CDCl}_3$ )  $\delta$  7.62-7.59 (m, 2H), 7.40-7.37 (m, 2H), 5.02-4.95 (m, 1H), 4.24

(qd,  $J = 11.8, 4.3$  Hz 2H), 3.43 (dd,  $J = 16.6, 10.8$  Hz, 1H), 3.13 (dd,  $J = 16.6, 7.3$  Hz, 1H), 2.09 (s, 3H);  $^{13}\text{C}$  NMR (100 MHz,  $\text{CDCl}_3$ )  $\delta$  170.7, 155.3, 136.2, 129.0, 127.9, 127.6, 78.4, 64.7, 37.0, 20.7;  $\nu$  (KBr)/ $\text{cm}^{-1}$ : 3445.3, 2988.9, 2361.8, 1761.0, 1601.6, 1369.2, 1241.9, 1052.6, 907.4, 825.5; HRMS (ESI)  $m/z$ : calcd for  $\text{C}_{12}\text{H}_{13}\text{ClNO}_3^+$ ,  $[\text{M}+\text{H}]^+$ : 254.0578, found: 254.0573.

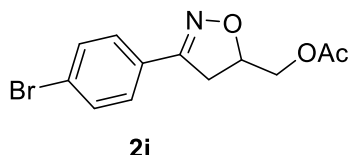

(3-(4-bromophenyl)-4,5-dihydroisoxazol-5-yl)methyl acetate (**2i**). 60.8 mg, 68% yield, white solid, **M. P.** 103.2-105.4 °C.  $^1\text{H}$  NMR (400 MHz,  $\text{CDCl}_3$ )  $\delta$  7.56-7.28 (m, 4H), 5.02-4.95 (m, 1H), 4.24 (qd,  $J = 11.8, 4.3$  Hz, 2H), 3.43 (dd,  $J = 16.7, 10.9$  Hz, 1H), 3.13 (dd,  $J = 16.7, 7.3$  Hz, 1H), 2.08 (s, 3H);  $^{13}\text{C}$  NMR (100 MHz,  $\text{CDCl}_3$ )  $\delta$  170.7, 155.4, 131.9, 128.1, 128.0, 124.5, 78.4, 64.7, 36.9, 20.7;  $\nu$  (KBr)/ $\text{cm}^{-1}$ : 3448.4, 2923.3, 2361.1, 1742.1, 1386.7, 1241.9, 1049.6, 892.9, 819.3, 538.8; HRMS (ESI)  $m/z$ : calcd for  $\text{C}_{12}\text{H}_{13}\text{BrNO}_3^+$ ,  $[\text{M}+\text{H}]^+$ : 298.0073, found: 298.0068.

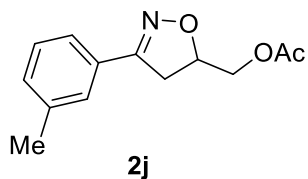

(3-(*m*-tolyl)-4,5-dihydroisoxazol-5-yl)methyl acetate (**2j**). 49.7 mg, 71% yield, yellow oil.  $^1\text{H}$  NMR (400 MHz,  $\text{CDCl}_3$ )  $\delta$  7.50 (s, 1H), 7.45 (d,  $J = 7.6$  Hz, 1H), 7.29 (t,  $J = 7.6$  Hz, 1H), 7.23 (d,  $J = 7.7$  Hz, 1H), 4.99-4.92 (m, 1H), 4.23 (qd,  $J = 11.8, 4.3$  Hz, 2H), 3.44 (dd,  $J = 16.7, 10.8$  Hz, 1H), 3.15 (dd,  $J = 16.7, 7.2$  Hz, 1H), 2.38 (s, 3H), 2.08 (s, 3H);  $^{13}\text{C}$  NMR (100 MHz,  $\text{CDCl}_3$ )  $\delta$  170.7, 156.3, 138.4, 131.0, 128.9, 128.5, 127.2, 123.8, 78.0, 64.8, 37.2, 21.2, 20.7;  $\nu$  (KBr)/ $\text{cm}^{-1}$ : 3734.5, 2926.8, 2361.6, 1743.2, 1608.2, 1368.5, 1240.1, 1047.8, 910.6, 778.7, 690.0; HRMS (ESI)  $m/z$ : calcd for  $\text{C}_{13}\text{H}_{16}\text{NO}_3^+$ ,  $[\text{M}+\text{H}]^+$ : 234.1125, found: 234.1120.

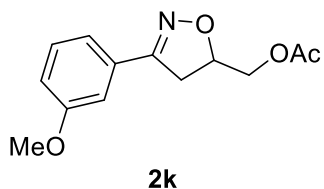

(3-(3-methoxyphenyl)-4,5-dihydroisoxazol-5-yl)methyl acetate (**2k**). 49.4 mg, 66% yield, yellow oil.  $^1\text{H}$  NMR (400 MHz,  $\text{CDCl}_3$ )  $\delta$  7.32 (t,  $J = 7.8$  Hz, 1H), 7.28-7.27 (m, 1H), 7.18 (d,  $J = 7.6$  Hz,



1H), 6.97 (dd,  $J = 8.3, 2.2$  Hz, 1H), 5.00-4.93 (m, 1H), 4.23 (qd,  $J = 11.7, 4.2$  Hz, 2H), 3.83 (s, 3H), 3.45 (dd,  $J = 16.8, 10.8$  Hz, 1H), 3.14 (dd,  $J = 16.8, 7.2$  Hz, 1H), 2.08 (s, 3H);  $^{13}\text{C}$  NMR (100 MHz,  $\text{CDCl}_3$ )  $\delta$  170.7, 159.6, 156.2, 130.3, 129.7, 119.3, 116.5, 111.3, 78.2, 64.8, 55.3, 37.2, 20.7;  $\nu$  (KBr)/ $\text{cm}^{-1}$ : 3733.6, 2928.4, 2361.0, 1741.8, 1565.2, 1431.9, 1369.2, 1237.8, 1042.2, 910.9, 777.0, 684.0; HRMS (ESI)  $m/z$ : calcd for  $\text{C}_{13}\text{H}_{16}\text{NO}_4^+$ ,  $[\text{M}+\text{H}]^+$ : 250.1074, found: 250.1069.

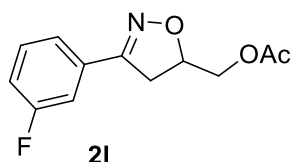

(3-(3-fluorophenyl)-4,5-dihydroisoxazol-5-yl)methyl acetate (**2l**). 46.3 mg, 65% yield, yellow oil.  $^1\text{H}$  NMR (400 MHz,  $\text{CDCl}_3$ )  $\delta$  7.43-7.36 (m, 3H), 7.15-7.10 (m, 1H), 5.04-4.97 (m, 1H), 4.25 (qd,  $J = 11.8, 4.1$  Hz, 2H), 3.44 (dd,  $J = 16.7, 10.9$  Hz, 1H), 3.15 (dd,  $J = 16.9, 7.5$  Hz, 1H), 2.09 (s, 3H);  $^{13}\text{C}$  NMR (100 MHz,  $\text{CDCl}_3$ )  $\delta$  170.7, 162.7 (d,  $J = 244.8$  Hz), 155.4 (d,  $J = 2.9$  Hz), 131.2 (d,  $J = 8.0$  Hz), 130.3 (d,  $J = 8.1$  Hz), 122.4 (d,  $J = 3.0$  Hz), 117.2 (d,  $J = 21.3$  Hz), 113.5 (d,  $J = 23.0$  Hz), 78.5, 64.7, 37.0, 20.7;  $\nu$  (KBr)/ $\text{cm}^{-1}$ : 3458.2, 2988.8, 2361.7, 1745.7, 1377.4, 1241.3, 1049.0, 917.4, 792.7; HRMS (ESI)  $m/z$ : calcd for  $\text{C}_{12}\text{H}_{13}\text{FNO}_3^+$ ,  $[\text{M}+\text{H}]^+$ : 238.0874, found: 238.0869.

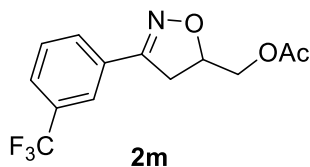

(3-(3-(trifluoromethyl)phenyl)-4,5-dihydroisoxazol-5-yl)methyl acetate (**2m**). 31.9 mg, 37% yield, yellow oil.  $^1\text{H}$  NMR (400 MHz,  $\text{CDCl}_3$ )  $\delta$  7.89 (d,  $J = 7.2$  Hz, 2H), 7.68 (d,  $J = 7.9$  Hz, 1H), 7.55 (d,  $J = 7.9$  Hz, 1H), 5.07-5.00 (m, 1H), 4.26 (qd,  $J = 11.8, 4.3$  Hz, 2H), 3.49 (dd,  $J = 16.7, 10.9$  Hz, 1H), 3.20 (dd,  $J = 16.7, 7.4$  Hz, 1H), 2.10 (s, 3H);  $^{13}\text{C}$  NMR (100 MHz,  $\text{CDCl}_3$ )  $\delta$  170.7, 155.2, 131.3 (q,  $J = 32.5$  Hz), 130.1, 129.7, 129.3, 126.7 (q,  $J = 3.6$  Hz), 123.7 (q,  $J = 270.6$  Hz), 123.4 (q,  $J = 3.7$  Hz), 78.7, 64.6, 36.9, 20.7;  $\nu$  (KBr)/ $\text{cm}^{-1}$ : 29227, 2359.8, 1744.0, 1239.3, 1167.0, 1047.4, 690.1; HRMS (ESI)  $m/z$ : calcd for  $\text{C}_{13}\text{H}_{13}\text{F}_3\text{NO}_3^+$ ,  $[\text{M}+\text{H}]^+$ : 288.0842, found: 288.0837.

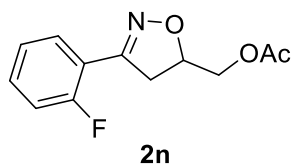

**(3-(2-fluorophenyl)-4,5-dihydroisoxazol-5-yl)methyl acetate (2n)**. 33.4 mg, 47% yield, yellow oil.  $^1\text{H NMR}$  (400 MHz,  $\text{CDCl}_3$ )  $\delta$  7.85 (td,  $J = 7.6, 1.5$  Hz, 1H), 7.44-7.38 (m, 1H), 7.21-7.10 (m, 1H), 5.02-4.95 (m, 1H), 4.24 (qd,  $J = 11.9, 4.2$  Hz, 2H), 3.55 (dd,  $J = 10.4, 2.8$  Hz, 1H), 3.25 (dd,  $J = 7.2, 2.3$  Hz, 1H), 2.10 (s, 3H);  $^{13}\text{C NMR}$  (100 MHz,  $\text{CDCl}_3$ )  $\delta$  170.8, 160.3 (d,  $J = 250.7$ ), 153.1 (d,  $J = 2.8$  Hz), 131.9 (d,  $J = 8.6$  Hz), 129.0 (d,  $J = 3.1$  Hz), 124.5 (d,  $J = 3.4$  Hz), 117.2 (d,  $J = 11.5$  Hz), 116.4 (d,  $J = 21.8$  Hz), 78.4 (d,  $J = 2.1$  Hz), 64.6, 38.9 (d,  $J = 7.2$  Hz), 20.7;  $\nu$  (KBr)/ $\text{cm}^{-1}$ : 3446.2, 2926.5, 2361.7, 1743.5, 1603.2, 1366.8, 1047.0, 911.3, 761.4, 551.9; **HRMS** (ESI)  $m/z$ : **calcd for**  $\text{C}_{12}\text{H}_{13}\text{FNO}_3^+$ ,  $[\text{M}+\text{H}]^+$ : 238.0874, **found**: 238.0870.

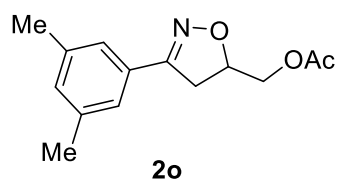

**(3-(3,5-dimethylphenyl)-4,5-dihydroisoxazol-5-yl)methyl acetate (2o)**. 50.4 mg, 68% yield, white solid, **M. P.** 91.3-93.1 °C.  $^1\text{H NMR}$  (400 MHz,  $\text{CDCl}_3$ )  $\delta$  7.29 (s, 2H), 7.05 (s, 1H), 4.98-4.91 (m, 1H), 4.22 (qd,  $J = 11.7, 4.3$  Hz, 2H), 3.43 (dd,  $J = 16.7, 10.8$  Hz, 1H), 3.25 (dd,  $J = 16.7, 7.2$  Hz, 1H), 2.33 (s, 6H), 2.08 (s, 3H);  $^{13}\text{C NMR}$  (100 MHz,  $\text{CDCl}_3$ )  $\delta$  170.7, 156.4, 138.2, 131.9, 128.8, 124.4, 77.9, 64.8, 37.3, 21.1, 20.7;  $\nu$  (KBr)/ $\text{cm}^{-1}$ : 3460.9, 2922.0, 1743.1, 1606.9, 1367.9, 1238.8, 1046.5, 910.0, 847.1, 792.0, 533.7; **HRMS** (ESI)  $m/z$ : **calcd for**  $\text{C}_{14}\text{H}_{18}\text{NO}_3^+$ ,  $[\text{M}+\text{H}]^+$ : 248.1281, **found**: 248.1277.

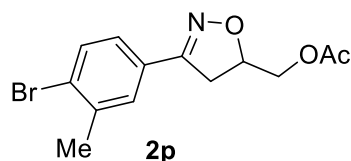

**(3-(4-bromo-3-methylphenyl)-4,5-dihydroisoxazol-5-yl)methyl acetate (2p)**. 51.5 mg, 55% yield, white solid, **M. P.** 113.3-115.7 °C.  $^1\text{H NMR}$  (400 MHz,  $\text{CDCl}_3$ )  $\delta$  7.49-7.46 (m, 2H), 7.24 (dd,  $J = 8.3, 1.9$  Hz, 1H), 4.93-4.86 (m, 1H), 4.16 (qd,  $J = 11.9, 4.3$  Hz, 2H), 3.35 (dd,  $J = 16.8, 10.9$  Hz, 1H), 3.05 (dd,  $J = 16.8, 7.3$  Hz, 1H), 2.34 (s, 3H), 2.01 (s, 3H);  $^{13}\text{C NMR}$  (100 MHz,  $\text{CDCl}_3$ )  $\delta$  170.7, 155.5, 138.5, 132.7, 128.7, 128.2, 127.0, 125.4, 78.3, 64.7, 37.0, 22.8, 20.7;  $\nu$  (KBr)/ $\text{cm}^{-1}$ : 3734.1, 3448.7, 2921.7, 2361.4, 1744.7, 1605.9, 1370.2, 1240.7, 1050.2, 913.3, 773.3, 681.2; **HRMS** (ESI)  $m/z$ : **calcd for**  $\text{C}_{13}\text{H}_{15}\text{BrNO}_3^+$ ,  $[\text{M}+\text{H}]^+$ : 312.0230, **found**: 312.0224.

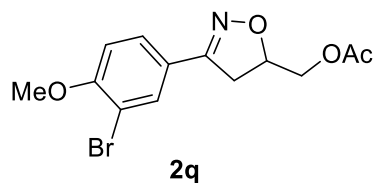

**(3-(3-bromo-4-methoxyphenyl)-4,5-dihydroisoxazol-5-yl)methyl acetate (2q).** 62.0 mg, 63% yield, white solid, **M. P.** 110.3-113.2 °C.  $^1\text{H NMR}$  (400 MHz,  $\text{CDCl}_3$ )  $\delta$  7.76 (d,  $J = 2.1$  Hz, 1H), 7.52 (dd,  $J = 8.6, 2.0$  Hz, 1H), 6.84 (d,  $J = 8.6$  Hz, 1H), 4.92-4.85 (m, 1H), 4.15 (qd,  $J = 11.8, 4.4$  Hz, 2H), 3.86 (s, 3H), 3.34 (dd,  $J = 16.7, 10.8$  Hz, 1H), 3.04 (dd,  $J = 16.6, 7.2$  Hz, 1H), 2.01 (s, 3H);  $^{13}\text{C NMR}$  (100 MHz,  $\text{CDCl}_3$ )  $\delta$  170.7, 157.2, 154.7, 131.6, 127.1, 122.9, 111.9, 111.7, 78.2, 64.7, 56.3, 37.2, 20.7;  $\nu$  (**KBr**)/ $\text{cm}^{-1}$ : 2921.5, 2359.8, 1742.4, 1508.6, 1385.9, 1345.0, 1237.8, 1047.1, 898.5, 832.1, 537.7; **HRMS** (ESI)  $m/z$ : **calcd for**  $\text{C}_{13}\text{H}_{15}\text{BrNO}_4^+$ , **[M+H]<sup>+</sup>**: 328.0179, **found**: 328.0173.

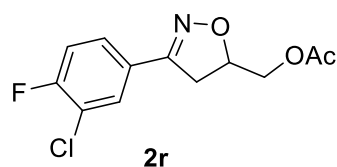

**(3-(3-chloro-4-fluorophenyl)-4,5-dihydroisoxazol-5-yl)methyl acetate (2r).** 52.4 mg, 52% yield, yellow solid, **M. P.** 90.8-93.2 °C.  $^1\text{H NMR}$  (400 MHz,  $\text{CDCl}_3$ )  $\delta$  7.49-7.36 (m, 3H), 5.05-4.98 (m, 1H), 4.25 (qd,  $J = 12.3, 4.3$  Hz, 2H), 3.42 (dd,  $J = 16.8, 11.0$  Hz, 1H), 3.12 (dd,  $J = 16.6, 7.3$  Hz, 1H), 2.09 (s, 3H);  $^{13}\text{C NMR}$  (100 MHz,  $\text{CDCl}_3$ )  $\delta$  170.7, 158.1 (d,  $J = 248.3$  Hz), 154.7 (d,  $J = 2.8$  Hz), 131.0, 129.6 (d,  $J = 7.2$  Hz), 123.0 (d,  $J = 17.8$  Hz), 123.0 (d,  $J = 3.6$  Hz), 114.6 (d,  $J = 22.6$  Hz), 78.8, 64.6, 36.8, 20.7;  $\nu$  (**KBr**)/ $\text{cm}^{-1}$ : 3447.5, 2924.2, 2363.7, 1745.2, 1557.2, 1370.7, 1241.6, 1049.4, 922.3, 810.7, 609.6; **HRMS** (ESI)  $m/z$ : **calcd for**  $\text{C}_{12}\text{H}_{12}\text{ClFNO}_3^+$ , **[M+H]<sup>+</sup>**: 272.0484, **found**: 272.0478.

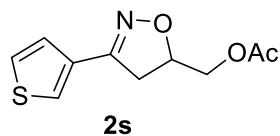

**(3-(thiophen-3-yl)-4,5-dihydroisoxazol-5-yl)methyl acetate (2s).** 27.7 mg, 41% yield, yellow oil.  $^1\text{H NMR}$  (400 MHz,  $\text{CDCl}_3$ )  $\delta$  7.50 (dd,  $J = 5.0, 1.0$  Hz, 1H), 7.46 (dd,  $J = 2.9, 1.1$  Hz, 1H), 7.37 (q,  $J = 2.7$  Hz, 1H), 4.97-4.90 (m, 1H), 4.23 (qd,  $J = 10.9, 4.3$  Hz, 2H), 3.44 (dd,  $J = 16.6, 10.7$  Hz, 1H), 3.14 (dd,  $J = 16.8, 7.5$  Hz, 1H), 2.09 (s, 3H);  $^{13}\text{C NMR}$  (100 MHz,  $\text{CDCl}_3$ )  $\delta$  170.8, 152.4,

131. 126.9, 125.6, 125.6, 77.9, 64.8, 37.9, 20.8;  $\nu$  (KBr)/ $\text{cm}^{-1}$ : 3729.3, 2919.9, 2361.8, 1744.7, 1518.1, 1240.1, 1048.8, 915.2, 778.4, 681.9; HRMS (ESI)  $m/z$ : calcd for  $\text{C}_{10}\text{H}_{12}\text{NO}_3\text{S}$ ,  $[\text{M}+\text{H}]^+$ : 226.0532, found: 226.0527.

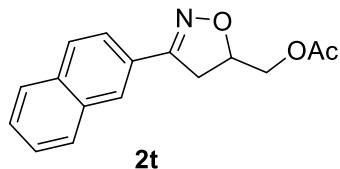

**(3-(naphthalen-2-yl)-4,5-dihydroisoxazol-5-yl)methyl acetate (2t)**. 61.4 mg, 76% yield, white solid, **M. P.** 98.8-100.3 °C.  $^1\text{H NMR}$  (400 MHz,  $\text{CDCl}_3$ )  $\delta$  7.95 (dd,  $J = 8.7, 1.6$  Hz, 1H), 7.87-7.81 (m, 4H), 7.54-7.48 (m, 2H), 5.04-4.97 (m, 1H), 4.26 (qd,  $J = 11.9, 4.3$  Hz, 2H), 3.53 (dd,  $J = 16.6, 10.8$  Hz, 1H), 3.26 (dd,  $J = 16.6, 7.3$  Hz, 1H), 2.08 (s, 3H);  $^{13}\text{C NMR}$  (100 MHz,  $\text{CDCl}_3$ )  $\delta$  170.7, 156.3, 134.0, 132.8, 128.5, 128.3, 127.8, 127.1, 126.9, 126.6, 123.4, 78.3, 64.8, 37.1, 20.7;  $\nu$  (KBr)/ $\text{cm}^{-1}$ : 3735.0, 2927.2, 2361.1, 1741.2, 1381.8, 1236.9, 1044.9, 907.8, 907.8, 812.7, 755.4, 683.2; HRMS (ESI)  $m/z$ : calcd for  $\text{C}_{16}\text{H}_{16}\text{NO}_3^+$ ,  $[\text{M}+\text{H}]^+$ : 270.1125, found: 270.1120.

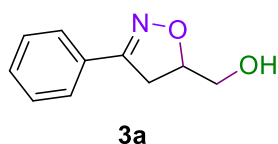

**(3-phenyl-4,5-dihydroisoxazol-5-yl)methanol (3a)**. 47.9 mg, 90% yield, white solid, **M. P.** 69.3-72.1 °C.  $^1\text{H NMR}$  (400 MHz,  $\text{CDCl}_3$ )  $\delta$  7.68-7.63 (m, 2H), 7.43-7.36 (m, 3H), 4.90-4.83 (m, 1H), 3.87 (dd,  $J = 12.2, 3.1$  Hz, 1H), 3.68 (dd,  $J = 12.2, 4.6$  Hz, 1H), 3.38 (dd,  $J = 16.7, 10.8$  Hz, 1H), 3.27 (dd,  $J = 16.6, 7.9$  Hz, 1H), 2.39 (s, 1H);  $^{13}\text{C NMR}$  (100 MHz,  $\text{CDCl}_3$ )  $\delta$  170.7, 156.3, 134.0, 132.8, 128.5, 128.3, 127.8, 127.1, 126.9, 126.6, 123.4, 78.3, 64.8, 37.1;  $\nu$  (KBr)/ $\text{cm}^{-1}$ : 3445.0, 2922.0, 1763.5, 1385.0, 1243.0, 1053.5, 904.5, 753.0, 691.9; HRMS (ESI)  $m/z$ : calcd for  $\text{C}_{10}\text{H}_{12}\text{NO}_2^+$ ,  $[\text{M}+\text{H}]^+$ : 178.0863, found: 178.0859.

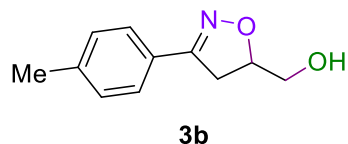

**(3-(p-tolyl)-4,5-dihydroisoxazol-5-yl)methanol (3b)**. 49.9 mg, 87% yield, white solid, **M. P.** 107.3-109.6 °C.  $^1\text{H NMR}$  (400 MHz,  $\text{CDCl}_3$ )  $\delta$  7.54 (d,  $J = 8.1$  Hz, 2H), 7.19 (d,  $J = 7.9$  Hz, 2H), 4.87-4.80 (m, 1H), 3.84 (dd,  $J = 12.1, 3.2$  Hz, 1H), 3.67 (dd,  $J = 12.1, 4.6$  Hz, 1H), 3.31 (qd,  $J = 19.4, 10.7$  Hz, 2H), 2.37 (s, 3H);  $^{13}\text{C NMR}$  (100 MHz,  $\text{CDCl}_3$ )  $\delta$  157.0, 140.4, 129.3, 126.6, 126.4,

81.0, 63.6, 36.4, 21.4;  $\nu$  (KBr)/ $\text{cm}^{-1}$ : 3445.8, 2926.1, 1747.3, 1603.3, 1464.2, 1242.4, 1168.1, 1047.5, 819.1, 542.5; HRMS (ESI)  $m/z$ : calcd for  $\text{C}_{11}\text{H}_{14}\text{NO}_2^+$ ,  $[\text{M}+\text{H}]^+$ : 192.1019, found: 192.1016.

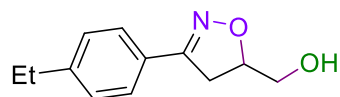

**3c**

**(3-(4-ethylphenyl)-4,5-dihydroisoxazol-5-yl)methanol (3c)**. 52.4 mg, 85% yield, white solid, **M. P.** 81.3-83.9 °C.  $^1\text{H NMR}$  (400 MHz,  $\text{CDCl}_3$ )  $\delta$  7.57 (d,  $J = 8.2$  Hz, 2H), 7.22 (d,  $J = 8.4$  Hz, 2H), 4.87-4.81 (m, 1H), 3.84 (dd,  $J = 12.3, 3.2$  Hz, 1H), 3.67 (dd,  $J = 12.3, 4.7$  Hz, 1H), 3.36 (qd,  $J = 19.2, 10.7$  Hz, 2H), 2.66 (q,  $J = 7.6$  Hz, 2H), 2.46 (s, 1H), 1.24 (t,  $J = 7.6$  Hz, 3H);  $^{13}\text{C NMR}$  (100 MHz,  $\text{CDCl}_3$ )  $\delta$  157.0, 146.7, 128.2, 126.7, 126.6, 81.0, 63.6, 36.4, 28.7, 15.3;  $\nu$  (KBr)/ $\text{cm}^{-1}$ : 3780.5, 3398.1, 2959.2, 1746.5, 1602.7, 1464.0, 1404.0, 1359.0, 1102.4, 1047.1, 902.1, 833.6, 567.7; HRMS (ESI)  $m/z$ : calcd for  $\text{C}_{12}\text{H}_{16}\text{NO}_2^+$ ,  $[\text{M}+\text{H}]^+$ : 206.1176, found: 206.1173.

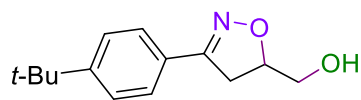

**3d**

**(3-(4-(tert-butyl)phenyl)-4,5-dihydroisoxazol-5-yl)methanol (3d)**. 60.2 mg, 86% yield, white solid, **M. P.** 79.3-82.5 °C.  $^1\text{H NMR}$  (400 MHz,  $\text{CDCl}_3$ )  $\delta$  7.61-7.59 (m, 2H), 7.43-7.40 (m, 2H), 4.87-4.81 (m, 1H), 3.84 (dd,  $J = 12.2, 3.4$  Hz, 1H), 3.67 (dd,  $J = 12.2, 4.8$  Hz, 1H), 3.32 (qd,  $J = 19.2, 10.5$  Hz, 2H), 2.49 (s, 1H), 1.32 (s, 9H);  $^{13}\text{C NMR}$  (100 MHz,  $\text{CDCl}_3$ )  $\delta$  156.9, 153.5, 126.5, 126.4, 125.6, 81.0, 63.6, 36.4, 34.8, 31.1;  $\nu$  (KBr)/ $\text{cm}^{-1}$ : 3347.4, 2963.0, 2924.1, 1739.2, 1598.1, 1364.3, 1243.1, 1048.7, 828.4, 778.5, 551.1; HRMS (ESI)  $m/z$ : calcd for  $\text{C}_{14}\text{H}_{20}\text{NO}_2^+$ ,  $[\text{M}+\text{H}]^+$ : 234.1489, found: 234.1484.

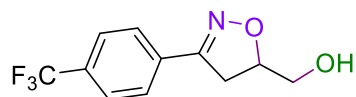

**3e**

**(3-(4-(trifluoromethyl)phenyl)-4,5-dihydroisoxazol-5-yl)methanol (3e)**. 41.9 mg, 57% yield, white solid, **M. P.** 72.6-75.3 °C.  $^1\text{H NMR}$  (400 MHz,  $\text{CDCl}_3$ )  $\delta$  7.70 (d,  $J = 8.1$  Hz, 2H), 7.58 (d,  $J = 8.2$  Hz, 2H), 4.89-4.80 (m, 1H), 3.84 (dd,  $J = 12.3, 3.1$  Hz, 1H), 3.63 (dd,  $J = 12.4, 4.4$  Hz, 1H),

3.28 (qd,  $J = 16.6, 9.4$  Hz, 2H), 1.91 (s, 1H);  $^{13}\text{C}$  NMR (100 MHz,  $\text{CDCl}_3$ )  $\delta$  156.0, 132.7, 131.8 (q,  $J = 32.7$  Hz), 126.9, 125.7 (q,  $J = 3.8$  Hz), 123.8 (q,  $J = 270.5$  Hz), 81.9, 64.1, 34.2;  $\nu$  (KBr)/ $\text{cm}^{-1}$ : 3436.1, 2926.4, 1762.7, 1604.7, 1324.2, 1243.7, 1061.1, 908.9, 839.8, 599.3; HRMS (ESI)  $m/z$ : calcd for  $\text{C}_{11}\text{H}_{11}\text{F}_3\text{NO}_2^+$ ,  $[\text{M}+\text{H}]^+$ : 246.0736, found: 246.0732.

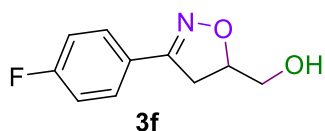

**(3-(4-fluorophenyl)-4,5-dihydroisoxazol-5-yl)methanol (3f)**. 39.2 mg, 67% yield, yellow oil.  $^1\text{H}$  NMR (400 MHz,  $\text{CDCl}_3$ )  $\delta$  7.67-7.64 (m, 2H), 7.11-7.07 (m, 2H), 4.91-4.84 (m, 1H), 3.88 (dd,  $J = 12.2, 3.1$  Hz, 1H), 3.53 (dd,  $J = 12.2, 4.4$  Hz, 1H), 3.40-3.24 (m, 2H), 2.09 (s, 1H);  $^{13}\text{C}$  NMR (100 MHz,  $\text{CDCl}_3$ )  $\delta$  163.8 (d,  $J = 246.5$  Hz), 156.1, 128.6 (d,  $J = 8.4$  Hz), 125.5, 115.8 (d,  $J = 21.8$  Hz), 81.3, 63.6, 36.3;  $\nu$  (KBr)/ $\text{cm}^{-1}$ : 3771.0, 3348.6, 2922.6, 1756.4, 1598.5, 1436.9, 1242.8, 1049.9, 825.3, 540.9; HRMS (ESI)  $m/z$ : calcd for  $\text{C}_{10}\text{H}_{11}\text{NO}_2\text{F}$ ,  $[\text{M}+\text{H}]^+$ : 196.0768, found: 196.0767.

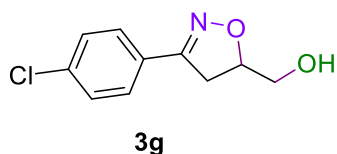

**(3-(4-chlorophenyl)-4,5-dihydroisoxazol-5-yl)methanol (3g)**. 45.0 mg, 71% yield, yellow oil,  $^1\text{H}$  NMR (400 MHz,  $\text{CDCl}_3$ )  $\delta$  7.57 (d,  $J = 8.4$  Hz, 2H), 7.36 (d,  $J = 8.4$  Hz, 2H), 4.91-4.84 (m, 1H), 3.88 (dd,  $J = 12.3, 3.2$  Hz, 1H), 3.68 (dd,  $J = 12.3, 4.4$  Hz, 1H), 3.31 (qd,  $J = 17.1, 10.7$  Hz, 2H), 2.27 (s, 1H);  $^{13}\text{C}$  NMR (100 MHz,  $\text{CDCl}_3$ )  $\delta$  156.1, 136.1, 128.9, 127.9, 127.8, 81.5, 63.5, 36.1;  $\nu$  (KBr)/ $\text{cm}^{-1}$ : 3351.1, 2923.7, 1745.9, 1597.6, 1400.5, 1361.7, 1097.4, 1049.9, 899.1, 826.3, 543.0; HRMS (ESI)  $m/z$ : calcd for  $\text{C}_{10}\text{H}_{11}\text{ClNO}_2^+$ ,  $[\text{M}+\text{H}]^+$ : 212.0473, found: 212.0469.

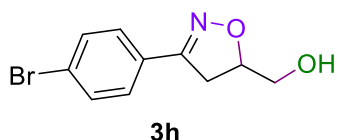

**(3-(4-bromophenyl)-4,5-dihydroisoxazol-5-yl)methanol (3h)**. 61.5 mg, 80% yield, white solid, **M. P.** 103.9-105.7  $^\circ\text{C}$ .  $^1\text{H}$  NMR (400 MHz,  $\text{CDCl}_3$ )  $\delta$  7.54-7.49 (m, 4H), 4.91-4.84 (m, 1H), 3.88 (dd,  $J = 12.4, 3.2$  Hz, 1H), 3.68 (dd,  $J = 12.4, 4.4$  Hz, 1H), 3.31 (qd,  $J = 17.1, 10.7$  Hz, 2H), 2.34 (s, 1H);  $^{13}\text{C}$  NMR (100 MHz,  $\text{CDCl}_3$ )  $\delta$  156.2, 131.9, 128.2, 128.1, 124.4, 81.5, 63.5, 36.0;  $\nu$

(KBr)/cm<sup>-1</sup>: 3338.0, 2923.5, 1912.6, 1736.2, 1595.6, 1362.7, 1049.8, 898.9, 541.8; HRMS (ESI) m/z: calcd for C<sub>10</sub>H<sub>11</sub>BrNO<sub>2</sub><sup>+</sup>, [M+H]<sup>+</sup>: 255.9968, found: 255.9965.

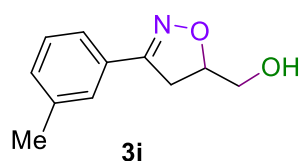

**(3-(m-tolyl)-4,5-dihydroisoxazol-5-yl)methanol (3i)**. 52.8 mg, 92% yield, yellow solid, **M. P.** 73.9-76.1 °C. <sup>1</sup>H NMR (400 MHz, CDCl<sub>3</sub>) δ 7.49 (s, 1H), 7.43 (d, *J* = 7.8 Hz, 1H), 7.28 (t, *J* = 7.6 Hz, 1H), 7.21 (d, *J* = 7.5 Hz, 1H), 4.88-4.82 (m, 1H), 3.85 (dd, *J* = 12.3, 3.2 Hz, 1H), 3.68 (dd, *J* = 12.3, 4.7 Hz, 1H), 3.32 (qd, *J* = 18.9, 10.8 Hz, 2H), 2.37 (s, 1H); <sup>13</sup>C NMR (100 MHz, CDCl<sub>3</sub>) δ 157.1, 138.4, 130.9, 129.1, 128.5, 127.2, 123.8, 81.1, 63.6, 36.3, 21.3; ν (KBr)/cm<sup>-1</sup>: 3770.8, 3395.36, 2922.7, 1733.5, 1575.8, 1439.0, 1092.0, 1045.5, 913.2, 791.9, 692.2, 525.3; HRMS (ESI) m/z: calcd for C<sub>11</sub>H<sub>14</sub>NO<sub>2</sub><sup>+</sup>, [M+H]<sup>+</sup>: 192.1019, found: 192.1016.

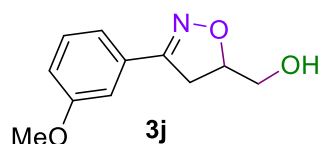

**(3-(3-methoxyphenyl)-4,5-dihydroisoxazol-5-yl)methanol (3j)**. 41.0 mg, 66% yield, yellow solid, **M. P.** 99.3-102.7 °C. <sup>1</sup>H NMR (400 MHz, CDCl<sub>3</sub>) δ 7.32-7.25 (m, 2H), 7.19-7.17 (m, 1H), 6.97-6.94 (m, 1H), 4.90-4.83 (m, 1H), 3.86 (dd, *J* = 12.3, 3.2 Hz, 1H), 3.83 (s, 3H), 3.68 (dd, *J* = 12.2, 4.7 Hz, 1H), 3.32 (qd, *J* = 19.4, 10.7 Hz, 2H), 2.26 (s, 1H); <sup>13</sup>C NMR (100 MHz, CDCl<sub>3</sub>) δ 159.6, 157.0, 130.5, 129.7, 119.3, 116.4, 111.3, 81.3, 63.6, 55.3, 36.3; ν (KBr)/cm<sup>-1</sup>: 3399.6, 2926.2, 1760.4, 1602.9, 1574.7, 1356.4, 1219.3, 1040.4, 790.9, 688.0, 564.9; HRMS (ESI) m/z: calcd for C<sub>11</sub>H<sub>14</sub>NO<sub>3</sub><sup>+</sup>, [M+H]<sup>+</sup>: 208.0968, found: 208.0967.

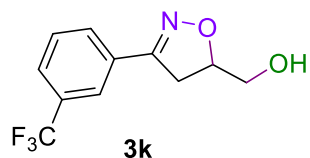

**(3-(3-(trifluoromethyl)phenyl)-4,5-dihydroisoxazol-5-yl)methanol (3k)**. 53.0 mg, 72% yield, yellow solid, **M. P.** 75.8-79.0 °C. <sup>1</sup>H NMR (400 MHz, CDCl<sub>3</sub>) δ 7.89 (s, 1H), 7.86 (d, *J* = 7.9 Hz, 1H), 7.66 (d, *J* = 7.9 Hz, 1H), 7.53 (t, *J* = 7.8 Hz, 1H), 4.96-4.89 (m, 1H), 3.92 (dd, *J* = 12.3, 3.1 Hz, 1H), 3.70 (dd, *J* = 12.4, 4.3 Hz, 1H), 3.37 (qd, *J* = 16.6, 10.7 Hz, 2H), 2.27 (s, 1H); <sup>13</sup>C

**NMR** (100 MHz, CDCl<sub>3</sub>)  $\delta$  156.0, 131.2 (q,  $J = 32.6$  Hz), 130.2, 129.7, 129.3, 126.6 (q,  $J = 3.6$  Hz), 123.5 (q,  $J = 270.8$  Hz), 123.4 (q,  $J = 3.8$  Hz), 81.8, 63.5, 35.9;  $\nu$  (KBr)/cm<sup>-1</sup>: 3428.6, 2928.2, 1763.8, 1603.3, 1367.8, 1313.8, 1243.2, 1051.9, 915.3, 693.0; **HRMS** (ESI) m/z: **calcd for** C<sub>11</sub>H<sub>11</sub>F<sub>3</sub>NO<sub>2</sub><sup>+</sup>, **[M+H]<sup>+</sup>**: 246.0736, **found**: 246.0732.

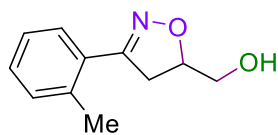

**3l**

**(3-(o-tolyl)-4,5-dihydroisoxazol-5-yl)methanol (3l)**. 36.1 mg, 63% yield, yellow solid, **M. P.** 78.3-81.1 °C. <sup>1</sup>H NMR (400 MHz, CDCl<sub>3</sub>)  $\delta$  7.35-7.22 (m, 4H), 4.85-4.78 (m, 1H), 3.87 (dd,  $J = 12.3, 3.2$  Hz, 1H), 3.69 (dd,  $J = 12.2, 4.7$  Hz, 1H), 3.38 (qd,  $J = 21.3, 10.6$  Hz, 2H), 2.55 (s, 3H), 2.09 (s, 1H); <sup>13</sup>C NMR (100 MHz, CDCl<sub>3</sub>)  $\delta$  158.0, 137.9, 131.5, 129.4, 128.8, 128.4, 125.8, 80.1, 63.7, 39.0, 22.8;  $\nu$  (KBr)/cm<sup>-1</sup>: 2991.2, 2389.8, 1763.9, 1531.1, 1399.2, 1243.0, 1053.3, 909.2, 751.5; **HRMS** (ESI) m/z: **calcd for** C<sub>11</sub>H<sub>14</sub>NO<sub>2</sub><sup>+</sup>, **[M+H]<sup>+</sup>**: 192.1019, **found**: 192.1015.

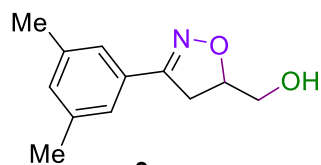

**3m**

**(3-(3,5-dimethylphenyl)-4,5-dihydroisoxazol-5-yl)methanol (3m)**. 51.1 mg, 83% yield, yellow solid, **M. P.** 132.1-135.2 °C. <sup>1</sup>H NMR (400 MHz, CDCl<sub>3</sub>)  $\delta$  7.28 (s, 2H), 7.05 (s, 1H), 4.86-4.81 (m, 1H), 3.84 (dd,  $J = 12.1, 2.9$  Hz, 1H), 3.67 (dd,  $J = 12.2, 4.7$  Hz, 1H), 3.30 (qd,  $J = 19.7, 10.7$  Hz, 2H), 2.32 (s, 7H); <sup>13</sup>C NMR (100 MHz, CDCl<sub>3</sub>)  $\delta$  157.2, 138.2, 131.8, 129.0, 124.5, 81.0, 63.7, 36.5, 21.1;  $\nu$  (KBr)/cm<sup>-1</sup>: 3359.3, 2919.2, 1733.6, 1436.9, 1097.0, 1047.2, 943.1, 626.4; **HRMS** (ESI) m/z: **calcd for** C<sub>12</sub>H<sub>16</sub>NO<sub>2</sub><sup>+</sup>, **[M+H]<sup>+</sup>**: 206.1176, **found**: 206.1175.

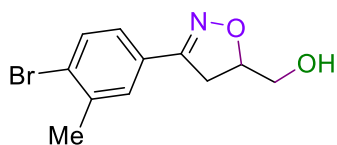

**3n**

**(3-(4-bromo-3-methylphenyl)-4,5-dihydroisoxazol-5-yl)methanol (3n)**. 56.7 mg, 70% yield, yellow solid, **M. P.** 109.3-112.1 °C. <sup>1</sup>H NMR (400 MHz, CDCl<sub>3</sub>)  $\delta$  7.54-7.52 (m, 2H), 7.14 (dd,  $J = 10.2, 2.0$  Hz, 1H), 4.90-4.83 (m, 1H), 3.87 (dd,  $J = 12.3, 3.1$  Hz, 1H), 3.68 (dd,  $J = 12.3, 4.5$  Hz,



1H), 3.30 (qd,  $J = 17.1, 9.8$  Hz, 2H), 2.40 (s, 4H);  $^{13}\text{C}$  NMR (100 MHz,  $\text{CDCl}_3$ )  $\delta$  156.4, 138.4, 132.6, 128.7, 128.4, 126.9, 125.4, 81.4, 63.5, 36.1, 22.8;  $\nu$  (KBr)/ $\text{cm}^{-1}$ : 3391.6, 2923.1, 2390.7, 1745.8, 1243.6, 1029.4, 915.9, 810.2, 539.4; HRMS (ESI)  $m/z$ : calcd for  $\text{C}_{11}\text{H}_{13}\text{BrNO}_2^+$ ,  $[\text{M}+\text{H}]^+$ : 270.0124, found: 270.0119.

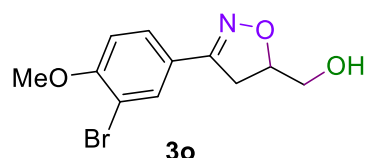

(3-(3-bromo-4-methoxyphenyl)-4,5-dihydroisoxazol-5-yl)methanol (**3o**). 30.9 mg, 36% yield, yellow solid, **M. P.** 119.2-121.5 °C.  $^1\text{H}$  NMR (400 MHz,  $\text{CDCl}_3$ )  $\delta$  7.83 (d,  $J = 2.1$  Hz, 1H), 7.56 (dd,  $J = 8.6, 2.1$  Hz, 1H), 6.89 (d,  $J = 8.6$  Hz, 1H), 4.88-4.81 (m, 1H), 3.92 (s, 3H), 3.86 (dd,  $J = 12.3, 3.2$  Hz, 1H), 3.67 (dd,  $J = 12.3, 4.6$  Hz, 1H), 3.28 (qd,  $J = 17.8, 10.6$  Hz, 2H), 2.34 (s, 1H);  $^{13}\text{C}$  NMR (100 MHz,  $\text{CDCl}_3$ )  $\delta$  157.2, 155.5, 131.6, 127.1, 123.2, 111.9, 111.6, 81.3, 63.5, 56.3, 36.2;  $\nu$  (KBr)/ $\text{cm}^{-1}$ : 3391.4, 2927.8, 1734.9, 1598.9, 1553.4, 1348.9, 1049.7, 905.6, 682.5, 591.6; HRMS (ESI)  $m/z$ : calcd for  $\text{C}_{11}\text{H}_{13}\text{BrNO}_3^+$ ,  $[\text{M}+\text{H}]^+$ : 286.0073, found: 286.0072.

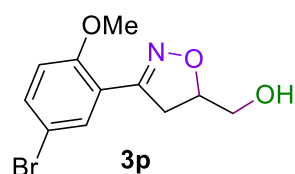

(3-(5-bromo-2-methoxyphenyl)-4,5-dihydroisoxazol-5-yl)methanol (**3p**). 45.0 mg, 52% yield, yellow solid, **M. P.** 110.3-112.5 °C.  $^1\text{H}$  NMR (400 MHz,  $\text{CDCl}_3$ )  $\delta$  7.76 (d,  $J = 2.5$  Hz, 1H), 7.38 (dd,  $J = 8.9, 2.6$  Hz, 1H), 6.74 (d,  $J = 8.9$  Hz, 1H), 4.78-4.71 (m, 1H), 3.78-3.74 (m, 4H), 3.60 (dd,  $J = 12.2, 4.9$  Hz, 1H), 3.39 (dd,  $J = 17.4, 10.7$  Hz, 1H), 3.30 (dd,  $J = 17.4, 7.9$  Hz, 1H), 2.03 (s, 1H);  $^{13}\text{C}$  NMR (100 MHz,  $\text{CDCl}_3$ )  $\delta$  156.6, 155.6, 133.8, 131.8, 120.3, 113.1, 113.0, 81.4, 63.7, 55.8, 38.7;  $\nu$  (KBr)/ $\text{cm}^{-1}$ : 3477.6, 2972.8, 1831.9, 1601.9, 1599.4, 1356.9, 1051.7, 935.6, 703.5, 603.6; HRMS (ESI)  $m/z$ : calcd for  $\text{C}_{11}\text{H}_{13}\text{BrNO} + 3$ ,  $[\text{M}+\text{H}]^+$ : 286.0073, found: 286.0072.

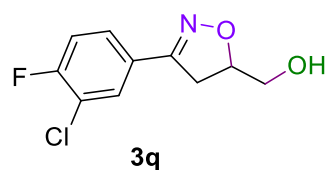

**(3-(3-chloro-4-fluorophenyl)-4,5-dihydroisoxazol-5-yl)methanol (3q)**. 61.3 mg, 89% yield, yellow solid, **M. P.** 112.0-115.2 °C.  $^1\text{H NMR}$  (400 MHz,  $\text{CDCl}_3$ )  $\delta$  7.45-7.40 (m, 2H), 7.34 (dd,  $J = 8.4, 1.5$  Hz, 1H), 4.94-4.87 (m, 1H), 3.90 (dd,  $J = 12.0, 3.0$  Hz, 1H), 3.69 (dd,  $J = 12.4, 4.2$  Hz, 1H), 3.30 (qd,  $J = 16.3, 10.8$  Hz, 2H), 2.25 (s, 1H);  $^{13}\text{C NMR}$  (100 MHz,  $\text{CDCl}_3$ )  $\delta$  168.0 (d,  $J = 248.2$  Hz), 155.5 (d,  $J = 2.7$  Hz), 130.9, 129.8 (d,  $J = 7.2$  Hz), 123.0 (d,  $J = 3.8$  Hz), 122.9 (d,  $J = 17.9$  Hz), 114.6 (d,  $J = 22.8$  Hz), 81.9, 63.4, 35.8;  $\nu$  (**KBr**)/ $\text{cm}^{-1}$ : 3409.2, 2923.8, 2390.7, 1763.4, 1243.2, 1052.8, 922.6, 809.9, 749.2; **HRMS** (ESI)  $m/z$ : **calcd for**  $\text{C}_{10}\text{H}_{10}\text{ClFNO}_2^+$ , **[M+H]<sup>+</sup>**: 230.0379, **found**: 230.0374.

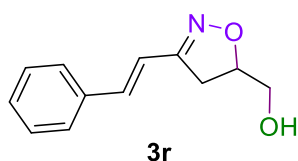

**(E)-3-styryl-4,5-dihydroisoxazol-5-yl)methanol (3r)**. 47.5 mg, 78% yield, white solid, **M. P.** 96.7-99.2 °C.  $^1\text{H NMR}$  (400 MHz,  $\text{CDCl}_3$ )  $\delta$  7.47-7.45 (m, 2H), 7.38-7.30 (m, 3H), 7.05 (d,  $J = 16.3$  Hz, 1H), 6.76 (d,  $J = 16.3$  Hz, 1H), 4.85-4.79 m, 1H), 3.86 (dd,  $J = 12.1, 3.1$  Hz, 1H), 3.66 (dd,  $J = 12.4, 4.6$  Hz, 1H), 3.25 (dd,  $J = 16.3, 10.8$  Hz, 1H), 3.13 (dd,  $J = 16.3, 7.7$  Hz, 1H), 2.10 (s, 1H);  $^{13}\text{C NMR}$  (100 MHz,  $\text{CDCl}_3$ )  $\delta$  158.2, 136.9, 135.6, 129.0, 128.8, 127.0, 117.6, 81.3, 63.7, 34.9;  $\nu$  (**KBr**)/ $\text{cm}^{-1}$ : 3346.9, 2921.9, 2397.2, 1761.7, 1457.2, 1242.9, 1051.5, 958.2, 913.5, 692.9; **HRMS** (ESI)  $m/z$ : **calcd for**  $\text{C}_{12}\text{H}_{14}\text{NO}_2^+$ , **[M+H]<sup>+</sup>**: 204.1019, **found**: 204.1016.

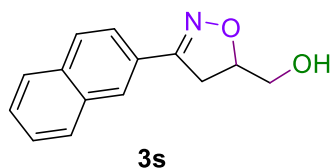

**(3-(naphthalen-2-yl)-4,5-dihydroisoxazol-5-yl)methanol (3s)**. 45.0 mg, 66% yield, white solid, **M. P.** 154.3-156.2 °C.  $^1\text{H NMR}$  (400 MHz,  $\text{CDCl}_3$ )  $\delta$  7.95-7.83 (m, 5H), 7.52-7.50 (m, 2H), 4.92 (d,  $J = 2.5$  Hz, 1H), 3.91 (d,  $J = 10.5$  Hz, 1H), 3.73 (dd,  $J = 12.0, 4.1$  Hz, 1H), 3.45 (qd,  $J = 18.3, 10.7$  Hz, 2H), 2.13 (s, 1H);  $^{13}\text{C NMR}$  (100 MHz,  $\text{CDCl}_3$ )  $\delta$  157.2, 134.0, 132.9, 128.5, 128.4, 127.8, 127.1, 127.0, 126.9, 126.7, 123.5, 81.4, 63.7, 36.3;  $\nu$  (**KBr**)/ $\text{cm}^{-1}$ : 3467.3, 2926.1, 1736.4, 1242.6, 1052.9, 918.9, 799.7, 647.3; **HRMS** (ESI)  $m/z$ : **calcd for**  $\text{C}_{14}\text{H}_{14}\text{NO}_2^+$ , **[M+H]<sup>+</sup>**: 228.1019, **found**: 228.1015.

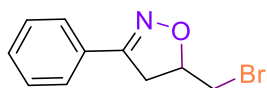

**4a**

**5-(bromomethyl)-3-phenyl-4,5-dihydroisoxazole (4a).** 54.7 mg, 74% yield, white solid, **M. P.** 69.8-73.2 °C.  $^1\text{H NMR}$  (400 MHz,  $\text{CDCl}_3$ )  $\delta$  7.69-7.64 (m, 2H), 7.43-7.38 (m, 3H), 5.03-4.96 (m, 1H), 3.91 (d,  $J = 10.5$  Hz, 1H), 3.57 (dd,  $J = 10.3, 4.3$  Hz, 1H), 3.50 (dd,  $J = 17.0, 10.4$  Hz, 1H), 3.41 (dd,  $J = 10.2, 8.1$  Hz, 1H), 3.32 (dd,  $J = 17.1, 6.5$  Hz, 1H);  $^{13}\text{C NMR}$  (100 MHz,  $\text{CDCl}_3$ )  $\delta$  156.0, 130.3, 128.9, 128.7, 1, 79.6, 39.5, 33.2;  $\nu$  (**KBr**)/ $\text{cm}^{-1}$ : 3447.6, 2923.7, 1747.7, 1603.5, 1362.5, 1243.1, 1050.9, 896.9, 752.9, 540.7; **HRMS** (ESI)  $m/z$ : **calcd for**  $\text{C}_{10}\text{H}_{11}\text{BrNO}^+$ , **[M+H] $^+$** : 240.0019, **found**: 240.0014.

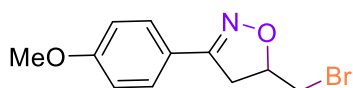

**4b**

**5-(bromomethyl)-3-(4-methoxyphenyl)-4,5-dihydroisoxazole (4b).** 29.2 mg, 36% yield, yellow solid, **M.P.** 59.3-62.1 °C.  $^1\text{H NMR}$  (400 MHz,  $\text{CDCl}_3$ )  $\delta$  7.55-7.52 (m, 2H), 5.87-6.83 (m, 2H), 4.93-4.86 (m, 1H), 3.77 (s, 3H), 3.50 (dd,  $J = 10.3, 4.2$  Hz, 1H), 3.41 (dd,  $J = 17.0, 10.4$  Hz, 1H), 3.32 (dd,  $J = 10.2, 8.4$  Hz, 1H), 3.22 (dd,  $J = 17.0, 6.4$  Hz, 1H);  $^{13}\text{C NMR}$  (100 MHz,  $\text{CDCl}_3$ )  $\delta$  161.2, 155.6, 128.3, 121.5, 114.1, 79.4, 55.3, 39.8, 33.2;  $\nu$  (**KBr**)/ $\text{cm}^{-1}$ : 2990.8, 1761.3, 1513.0, 1244.6, 1050.1, 831.8, 749.3; **HRMS** (ESI)  $m/z$ : **calcd for**  $\text{C}_{11}\text{H}_{13}\text{BrNO}_2^+$ , **[M+H] $^+$** : 270.0124, **found**: 270.0118.

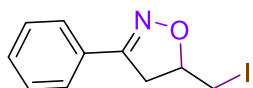

**5a**

**5-(iodomethyl)-3-phenyl-4,5-dihydroisoxazole (5a).** 81.8 mg, 95% yield, yellow solid, **M. P.** 69.3.-73.1 °C.  $^1\text{H NMR}$  (400 MHz,  $\text{CDCl}_3$ )  $\delta$  7.62-7.57 (m, 2H), 7.37-7.30 (m, 3H), 4.89-4.81 (m, 1H), 3.44 (dd,  $J = 16.9, 10.3$  Hz, 1H), 3.34 (dd,  $J = 10.0, 4.0$  Hz, 1H), 3.18-3.13 (m, 2H);  $^{13}\text{C NMR}$  (100 MHz,  $\text{CDCl}_3$ )  $\delta$  155.8, 130.3, 129.0, 128.7, 126.7, 80.3, 41.0, 7.6;  $\nu$  (**KBr**)/ $\text{cm}^{-1}$ : 3449.6, 2991.2, 1763.4, 1362.9, 1243.3, 1054.3, 898.1, 753.6, 689.5; **HRMS** (ESI)  $m/z$ : **calcd for**  $\text{C}_{10}\text{H}_{11}\text{INO}^+$ , **[M+H] $^+$** : 287.9880, **found**: 287.9874.

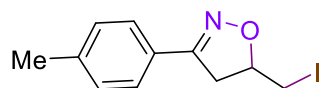

**5b**

**5-(iodomethyl)-3-(p-tolyl)-4,5-dihydroisoxazole (5b).** 63.2 mg, 70% yield, yellow solid, **M. P.** 108.3-112.1 °C.  $^1\text{H NMR}$  (400 MHz,  $\text{CDCl}_3$ )  $\delta$  7.96 (d,  $J = 8.1$  Hz, 2H), 7.13 (d,  $J = 8.0$  Hz, 2H), 4.86-4.78 (m, 1H), 3.42 (dd,  $J = 17.0, 10.3$  Hz, 1H), 3.33 (dd,  $J = 10.3, 4.1$  Hz, 1H), 3.17-3.10 (m, 2H), 2.30 (s, 3H);  $^{13}\text{C NMR}$  (100 MHz,  $\text{CDCl}_3$ )  $\delta$  155.8, 130.3, 129.0, 128.7, 126.7, 80.3, 41.0, 7.6;  $\nu$  (**KBr**)/ $\text{cm}^{-1}$ : 3445.8, 2926.1, 1747.3, 1603.3, 1364.2, 1324.4, 1242.4, 1047.5, 898.9, 542.5; **HRMS** (ESI)  $m/z$ : **calcd for**  $\text{C}_{11}\text{H}_{13}\text{INO}^+$ , **[M+H]<sup>+</sup>**: 302.0036, **found**: 302.0031.

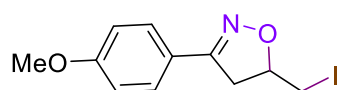

**5c**

**5-(iodomethyl)-3-(4-methoxyphenyl)-4,5-dihydroisoxazole (5c).** 47.6 mg, 50% yield, yellow solid, **M. P.** 86.8-90.2 °C.  $^1\text{H NMR}$  (400 MHz,  $\text{CDCl}_3$ )  $\delta$  7.55-7.51 (m, 2H), 6.87-6.83 (m, 2H), 4.85-4.76 (m, 1H), 3.77 (s, 3H), 3.42 (dd,  $J = 17.0, 10.3$  Hz, 1H), 3.33 (dd,  $J = 10.0, 4.1$  Hz, 1H), 3.17-3.10 (m, 2H);  $^{13}\text{C NMR}$  (100 MHz,  $\text{CDCl}_3$ )  $\delta$  161.2, 155.3, 128.3, 121.6, 114.1, 80.1, 55.3, 41.2, 7.7;  $\nu$  (**KBr**)/ $\text{cm}^{-1}$ : 2925.6, 2392.4, 1746.3, 1513.6, 1248.0, 1044.2, 896.5, 754.4, 610.3; **HRMS** (ESI)  $m/z$ : **calcd for**  $\text{C}_{11}\text{H}_{13}\text{INO}_2^+$ , **[M+H]<sup>+</sup>**: 317.9985, **found**: 317.9980.

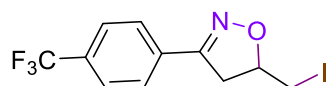

**5d**

**5-(iodomethyl)-3-(4-(trifluoromethyl)phenyl)-4,5-dihydroisoxazole (5d).** 75.6 mg, 71% yield, yellow solid, **M. P.** 76.5-79.3 °C.  $^1\text{H NMR}$  (400 MHz,  $\text{CDCl}_3$ )  $\delta$  7.70 (d,  $J = 8.3$  Hz, 2H), 7.58 (d,  $J = 8.4$  Hz, 2H), 4.92-4.85 (m, 1H), 3.45 (dd,  $J = 17.0, 10.5$  Hz, 1H), 3.37 (dd,  $J = 10.1, 4.0$  Hz, 1H), 3.21-3.12 (m, 2H);  $^{13}\text{C NMR}$  (100 MHz,  $\text{CDCl}_3$ )  $\delta$  154.7, 132.5, 131.7 (q,  $J = 32.5$  Hz), 126.9, 125.7 (q,  $J = 3.7$  Hz), 123.7 (q,  $J = 270.6$  Hz), 80.8, 40.7, 7.2;  $\nu$  (**KBr**)/ $\text{cm}^{-1}$ : 3447.1, 2926.5, 1758.2, 1605.3, 1325.4, 1243.5, 1125.1, 1067.8, 840.1, 694.0; **HRMS** (ESI)  $m/z$ : **calcd for**  $\text{C}_{11}\text{H}_{10}\text{F}_3\text{INO}^+$ , **[M+H]<sup>+</sup>**: 355.9754, **found**: 355.9748.

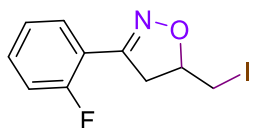

**5e**

**3-(2-fluorophenyl)-5-(iodomethyl)-4,5-dihydroisoxazole (5e).** 89.7 mg, 98% yield, yellow solid, **M. P.** 79.3-82.5 °C.  $^1\text{H NMR}$  (400 MHz,  $\text{CDCl}_3$ )  $\delta$  7.76 (td,  $J = 7.6, 1.7$  Hz, 1H), 7.35-7.29 (m, 1H), 7.12-7.01 (m, 2H), 4.87-4.79 (m, 1H), 3.52 (ddd,  $J = 17.6, 10.3, 2.4$  Hz, 1H), 3.32 (dd,  $J = 10.2, 4.2$  Hz, 1H), 3.25-3.15 (m, 2H);  $^{13}\text{C NMR}$  (100 MHz,  $\text{CDCl}_3$ )  $\delta$  161.3 (d,  $J = 251.0$  Hz), 152.6 (d,  $J = 3.0$  Hz), 131.9 (d,  $J = 8.6$  Hz), 129.0 (d,  $J = 2.9$  Hz), 124.4 (d,  $J = 3.4$  Hz), 117.2 (d,  $J = 11.6$  Hz), 116.4 (d,  $J = 21.8$  Hz), 80.4 (d,  $J = 2.1$  Hz), 42.6 (d,  $J = 6.9$  Hz) 7.3;  $\nu$  (KBr)/ $\text{cm}^{-1}$ : 2927.4, 2360.6, 1756.4, 1599.3, 1449.7, 1239.0, 908.9, 757.8, 507.4; **HRMS** (ESI)  $m/z$ : **calcd for**  $\text{C}_{10}\text{H}_{10}\text{FINO}^+$ , **[M+H]<sup>+</sup>**: 305.9786, **found**: 305.9780.

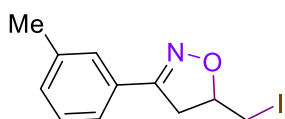

**5f**

**5-(iodomethyl)-3-(m-tolyl)-4,5-dihydroisoxazole (5f).** 86.7 mg, 96% yield, yellow solid, **M. P.** 92.3-95.4 °C.  $^1\text{H NMR}$  (400 MHz,  $\text{CDCl}_3$ )  $\delta$  7.4 (s, 1H), 7.36 (d,  $J = 7.6$  Hz, 1H), 7.20 (t,  $J = 7.6$  Hz, 1H), 7.14 (d,  $J = 7.6$  Hz, 1H), 4.84-4.77 (m, 1H), 3.40 (dd,  $J = 17.7, 10.5$  Hz, 1H), 3.31 (dd,  $J = 10.0, 4.0$  Hz, 1H), 3.16-3.09 (m, 2H), 2.29 (s, 3H);  $^{13}\text{C NMR}$  (100 MHz,  $\text{CDCl}_3$ )  $\delta$  155.8, 138.4, 131.0, 128.8, 128.5, 127.2, 123.8, 80.2, 40.9, 21.3, 7.6;  $\nu$  (KBr)/ $\text{cm}^{-1}$ : 2990.3, 2392.7, 1762.9, 1545.7, 1242.8, 1053.2, 902.6, 692.0; **HRMS** (ESI)  $m/z$ : **calcd for**  $\text{C}_{11}\text{H}_{13}\text{INO}^+$ , **[M+H]<sup>+</sup>**: 302.0036, **found**: 302.0030.

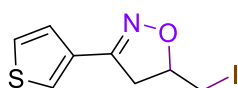

**5g**

**5-(iodomethyl)-3-(thiophen-3-yl)-4,5-dihydroisoxazole (5g).** 84.4 mg, 96% yield, yellow solid, **M. P.** 86.3-89.1 °C.  $^1\text{H NMR}$  (400 MHz,  $\text{CDCl}_3$ )  $\delta$  7.41-7.9 (m, 2H), 7.29 (d,  $J = 5.0, 3.1$  Hz, 1H), 4.85-4.77 (m, 1H), 3.42 (dd,  $J = 16.9, 10.3$  Hz, 1H), 3.33 (dd,  $J = 10.1, 4.1$  Hz, 1H), 3.16-3.10 (m, 2H);  $^{13}\text{C NMR}$  (100 MHz,  $\text{CDCl}_3$ )  $\delta$  151.9, 130.8, 126.9, 125.8, 125.5, 80.0, 41.6, 7.5;  $\nu$

(KBr)/cm<sup>-1</sup>: 3447.5, 2921.0, 1763.7, 1605.1, 1243.2, 1055.1, 786.9, 623.9; HRMS (ESI) m/z: calcd for C<sub>8</sub>H<sub>9</sub>INOS<sup>+</sup>, [M+H]<sup>+</sup>: 293.9444, found: 293.9438.

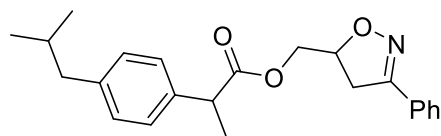

**7a**

**(3-phenyl-4,5-dihydroisoxazol-5-yl)methyl 3-(4-isobutylphenyl)-2-methylpropanoate (7a).**

67.6 mg, 89% yield, yellow solid, **M. P.** 102.1-105.2 °C. <sup>1</sup>H NMR (400 MHz, CDCl<sub>3</sub>) δ 7.66-7.61 (m, 2H), 7.47-7.40 (m, 3H), 7.17 (dd, J = 17.4, 7.9 Hz, 1H), 7.20 (dd, J = 19.1, 7.9 Hz, 1H), 4.97-4.90 (m, 1H), 4.30-4.22 (m, 2H), 3.78-3.72 (m, 1H), 3.33 (td, J = 16.6, 11.0 Hz, 1H), 3.05-2.94 (m, 1H), 2.42 (t, J = 6.8 Hz, 2H), 1.89-1.78 (m, 1H), 1.50 (dd, J = 7.2, 2.4 Hz, 3H), 0.91 (d, J = 6.6 Hz, 6H); <sup>13</sup>C NMR (100 MHz, CDCl<sub>3</sub>) δ 174.4(174.4), 156.1(156.1), 140.6(140.5), 137.3(137.2), 130.2(130.1), 129.3 (129.2), 128.7(128.6), 127.1(127.1), 126.6, 78.1(78.1), 64.8, 45.0, 44.9(44.8), 37.0(36.8), 30.1, 22.3, 18.2(17.9); ν (KBr)/cm<sup>-1</sup>: 2927.1, 2358.8, 1744.8, 1602.7, 1365.4, 1237.0, 1048.5, 758.1, 545.9; HRMS (ESI) m/z: calcd for C<sub>24</sub>H<sub>30</sub>NO<sub>3</sub><sup>+</sup>, [M+H]<sup>+</sup>: 380.2220, found: 380.2217.

## 4. X-ray Crystallographic Analysis

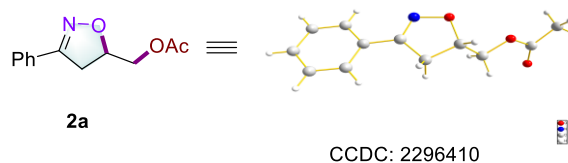

**Table 1 Crystal data and structure refinement for 2a.**

| Identification code                         | 2a                                                            |
|---------------------------------------------|---------------------------------------------------------------|
| Empirical formula                           | C <sub>12</sub> H <sub>13</sub> NO <sub>3</sub>               |
| Formula weight                              | 219.23                                                        |
| Temperature/K                               | 100                                                           |
| Crystal system                              | monoclinic                                                    |
| Space group                                 | P2 <sub>1</sub> /c                                            |
| a/Å                                         | 25.4531(15)                                                   |
| b/Å                                         | 5.4653(3)                                                     |
| c/Å                                         | 7.6438(4)                                                     |
| α/°                                         | 90                                                            |
| β/°                                         | 95.309(2)                                                     |
| γ/°                                         | 90                                                            |
| Volume/Å <sup>3</sup>                       | 1058.76(10)                                                   |
| Z                                           | 4                                                             |
| ρ <sub>calc</sub> /cm <sup>3</sup>          | 1.375                                                         |
| μ/mm <sup>-1</sup>                          | 0.099                                                         |
| F(000)                                      | 464.0                                                         |
| Crystal size/mm <sup>3</sup>                | 0.11 × 0.04 × 0.02                                            |
| Radiation                                   | MoKα (λ = 0.71073)                                            |
| 2θ range for data collection/°              | 4.822 to 52.752                                               |
| Index ranges                                | -31 ≤ h ≤ 31, -6 ≤ k ≤ 6, -9 ≤ l ≤ 9                          |
| Reflections collected                       | 9339                                                          |
| Independent reflections                     | 2123 [R <sub>int</sub> = 0.0791, R <sub>sigma</sub> = 0.0673] |
| Data/restraints/parameters                  | 2123/0/146                                                    |
| Goodness-of-fit on F <sup>2</sup>           | 1.088                                                         |
| Final R indexes [I ≥ 2σ(I)]                 | R <sub>1</sub> = 0.0522, wR <sub>2</sub> = 0.1065             |
| Final R indexes [all data]                  | R <sub>1</sub> = 0.0867, wR <sub>2</sub> = 0.1236             |
| Largest diff. peak/hole / e Å <sup>-3</sup> | 0.20/-0.26                                                    |

## 5. $^1\text{H}$ NMR and $^{13}\text{C}$ NMR Spectra of Compounds

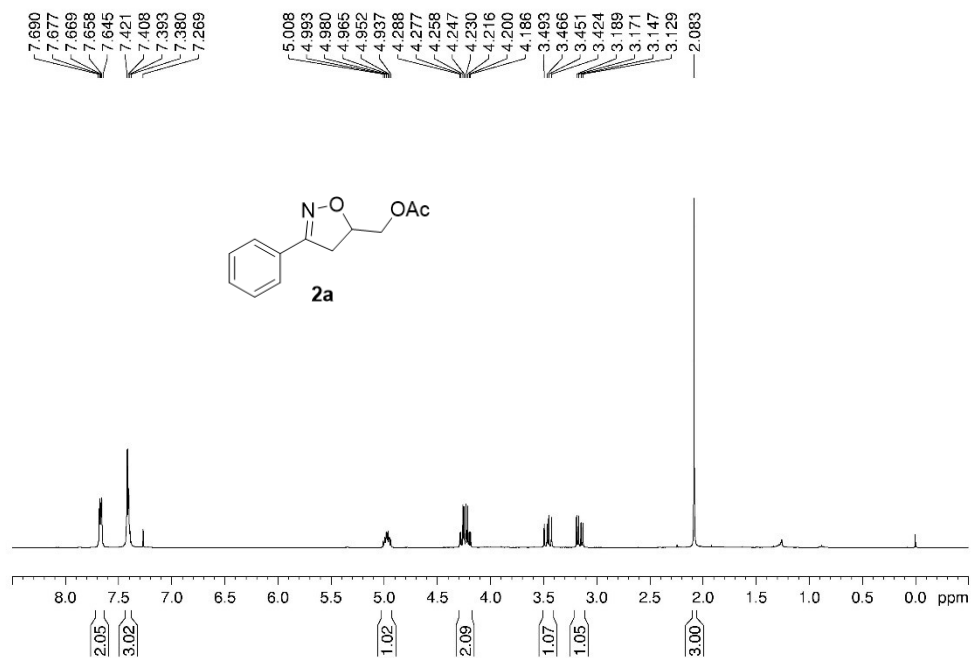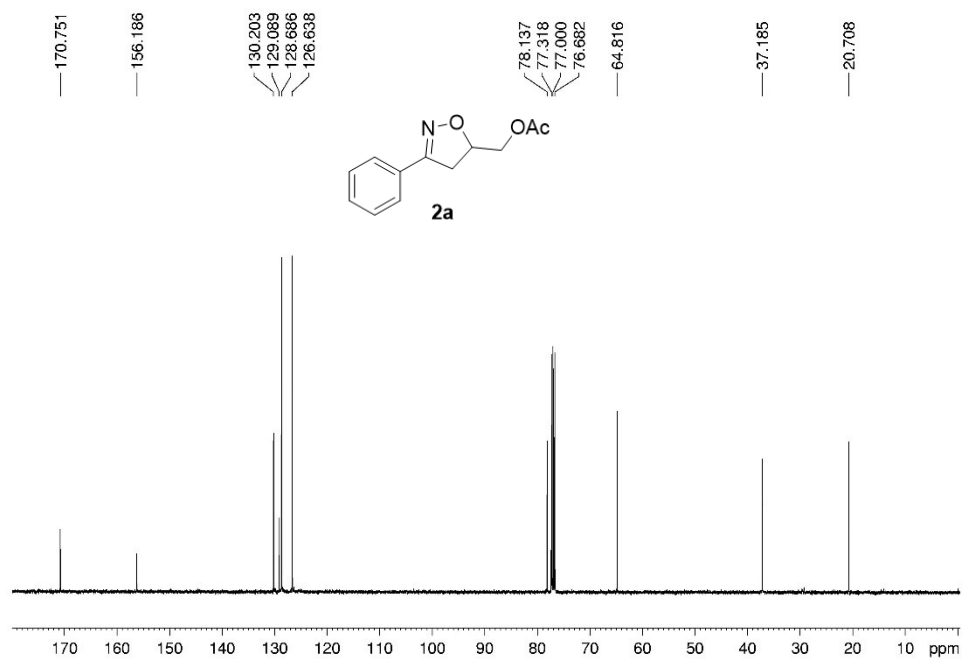



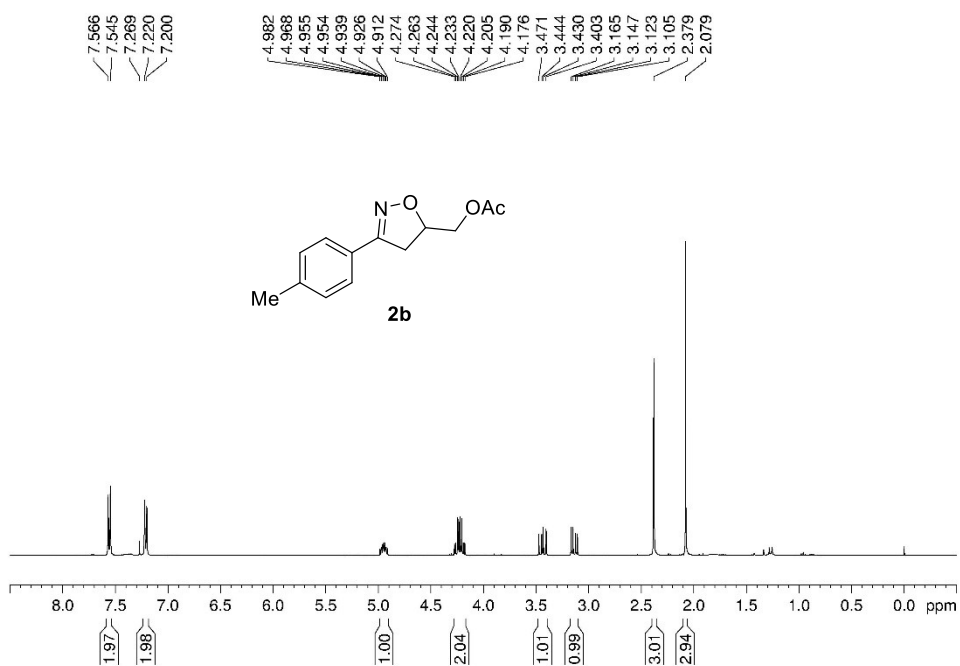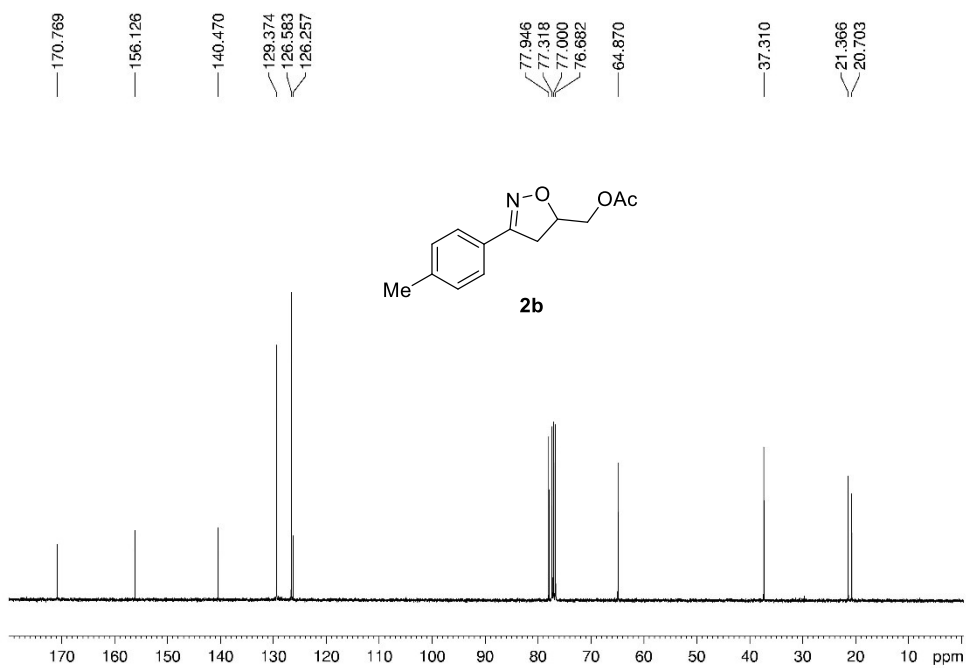

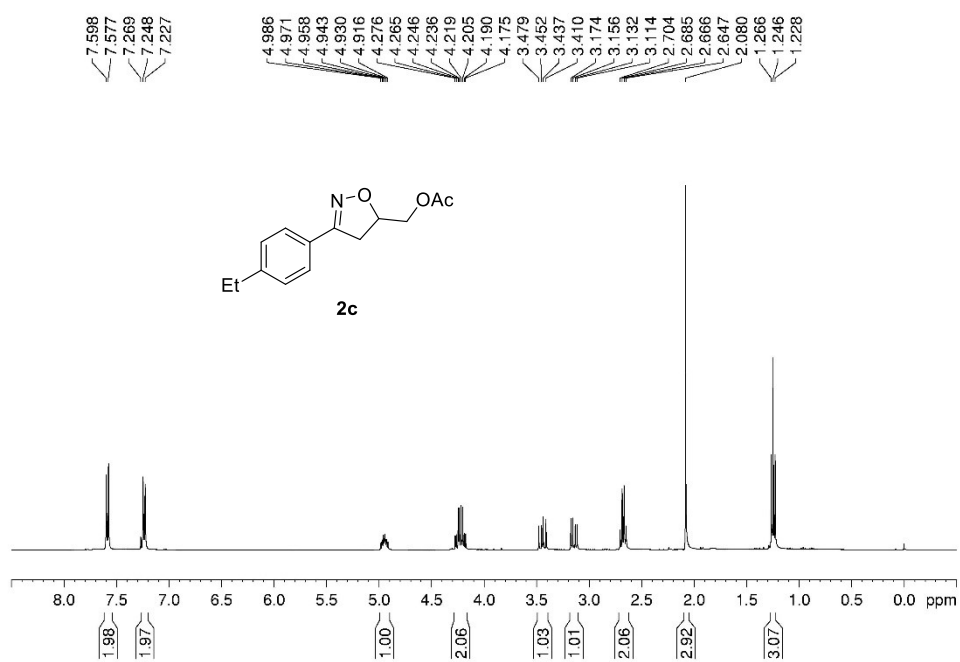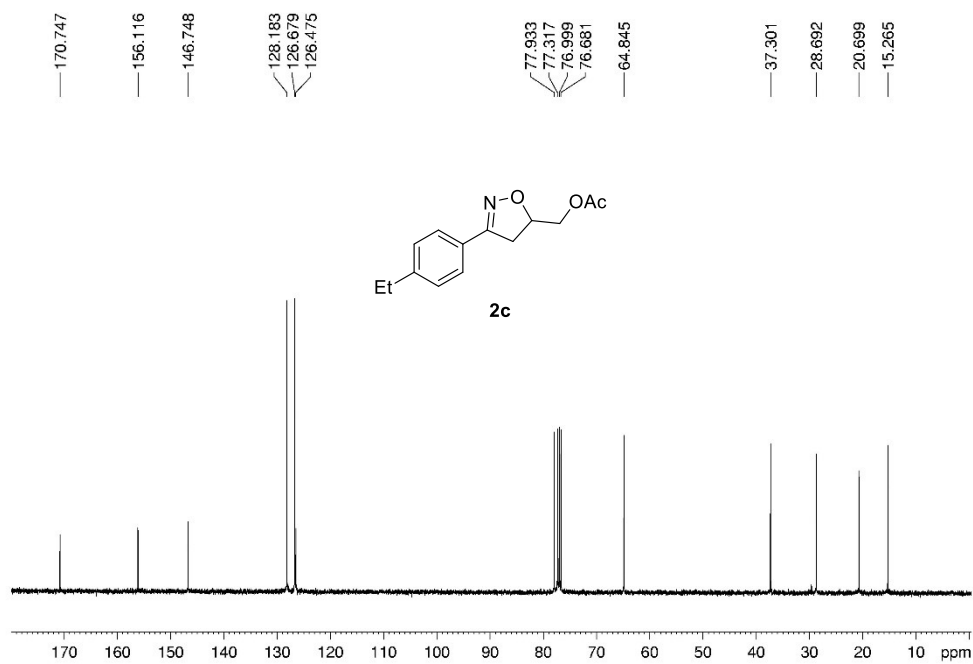

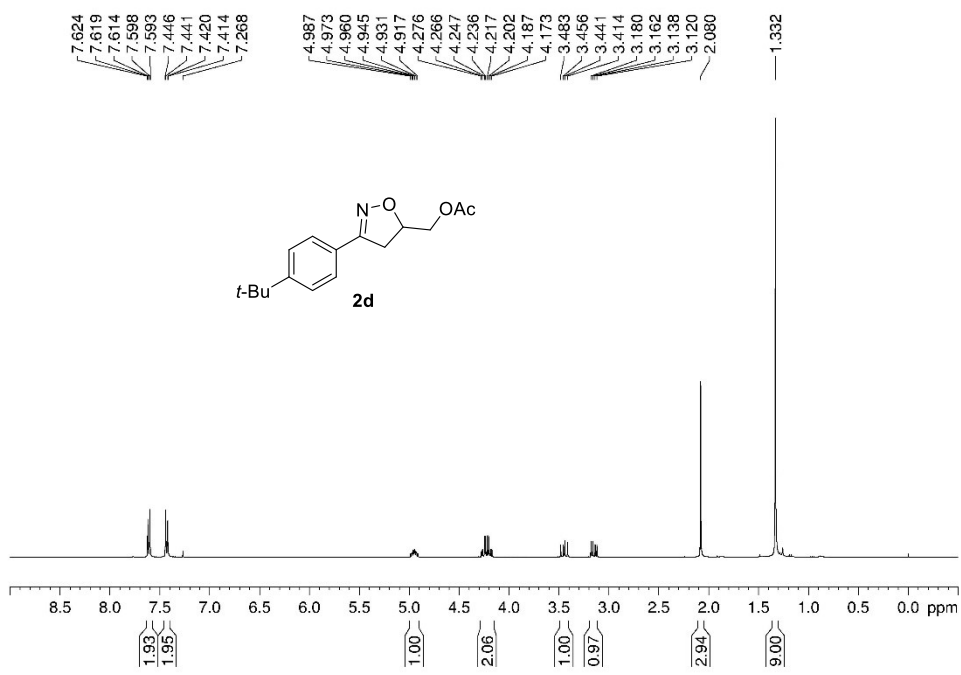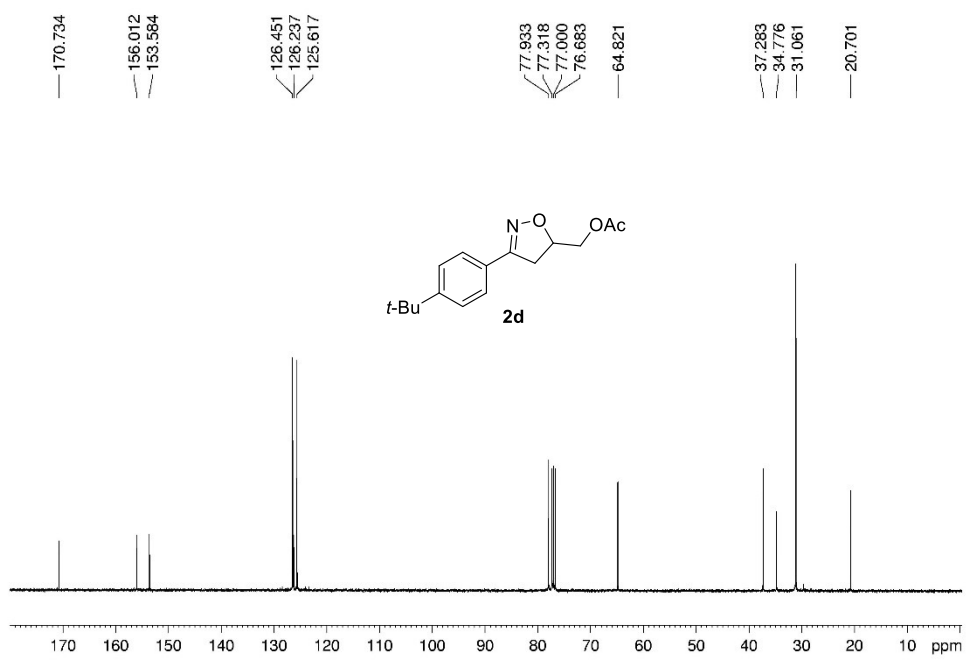

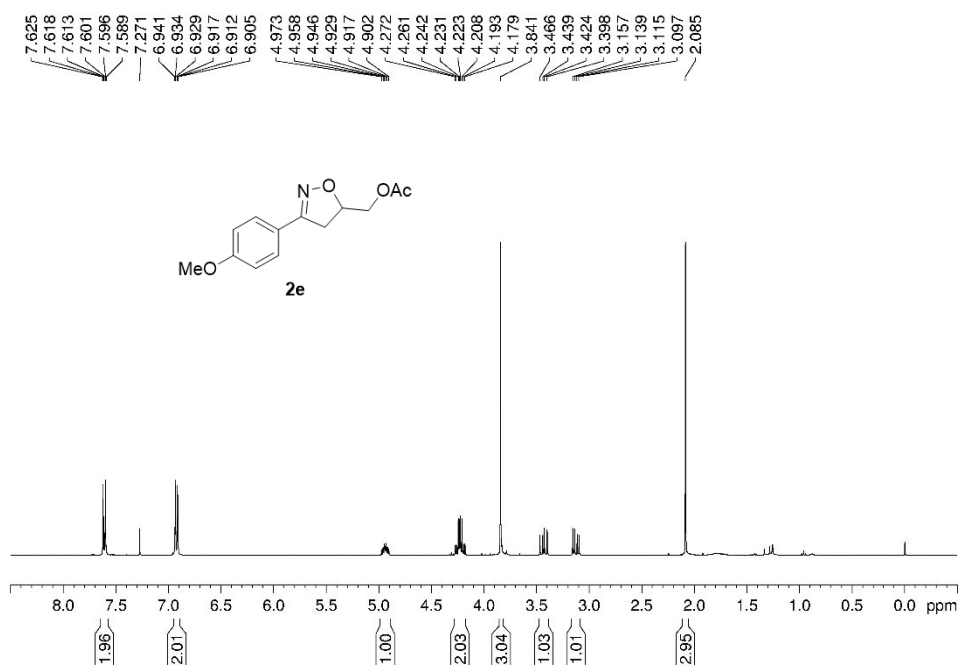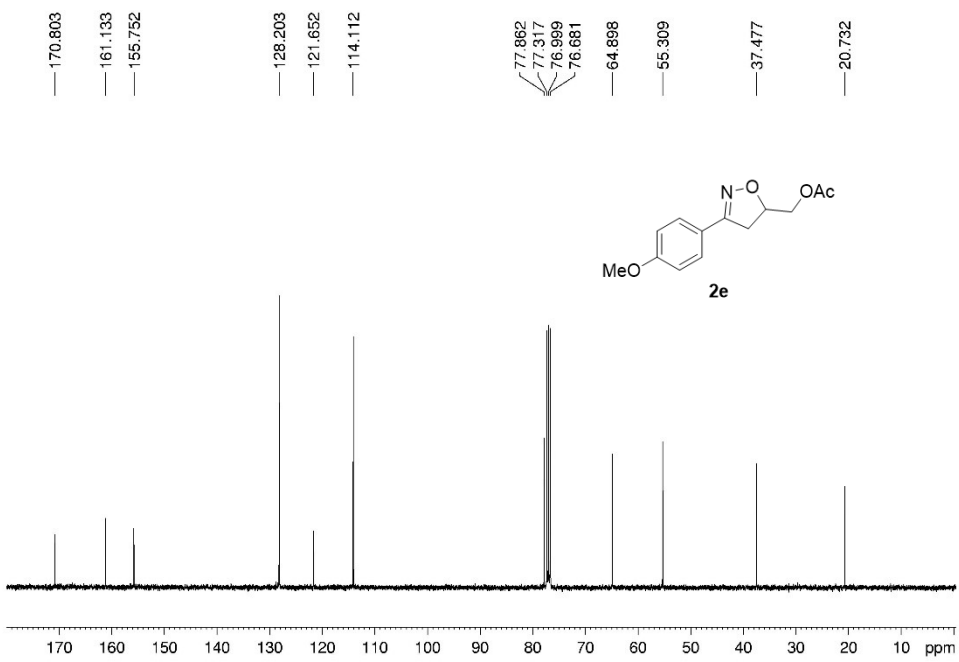

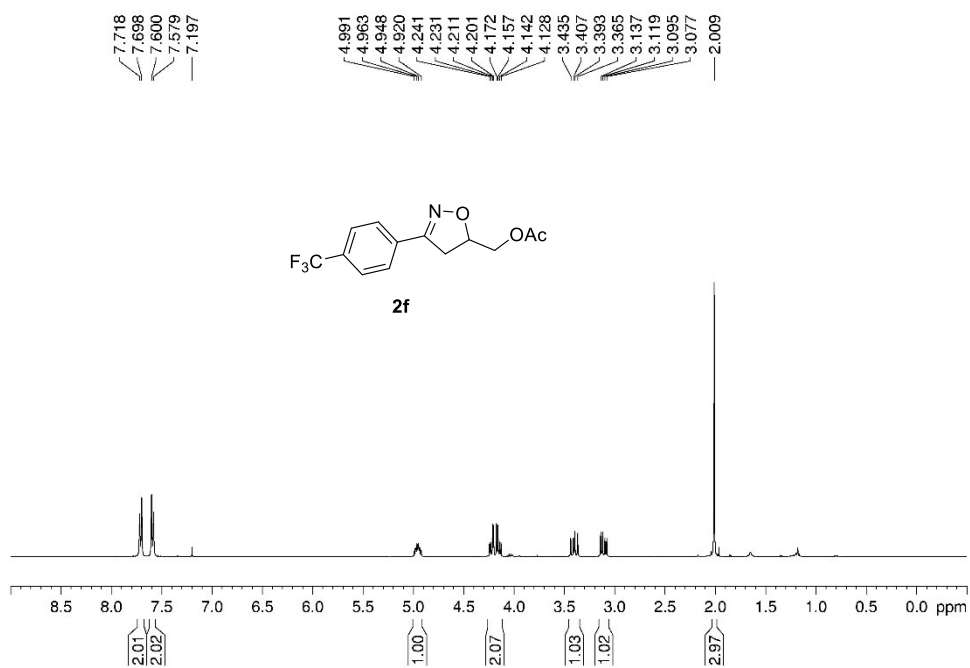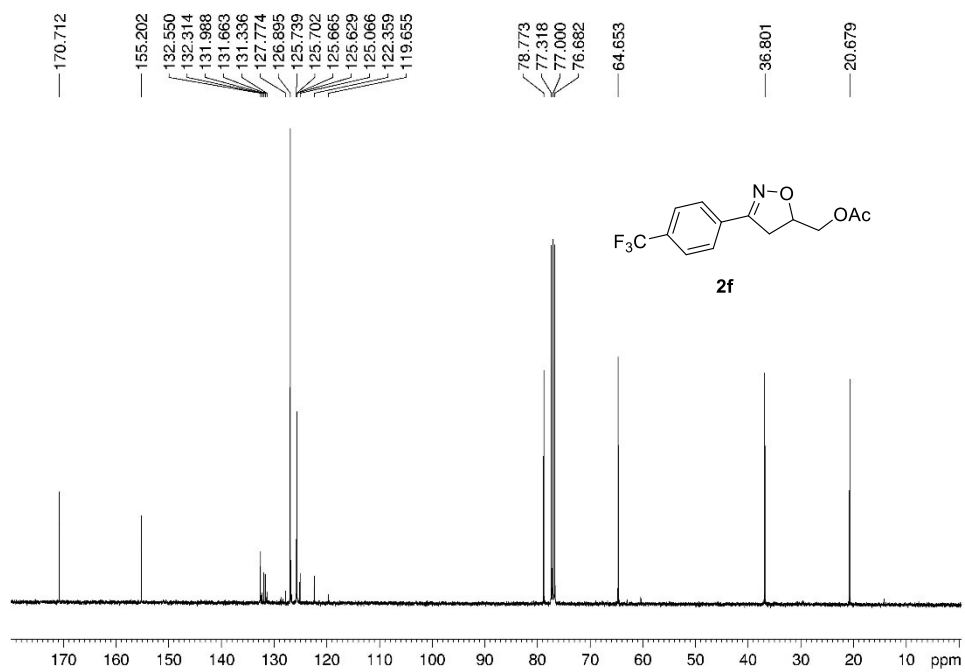

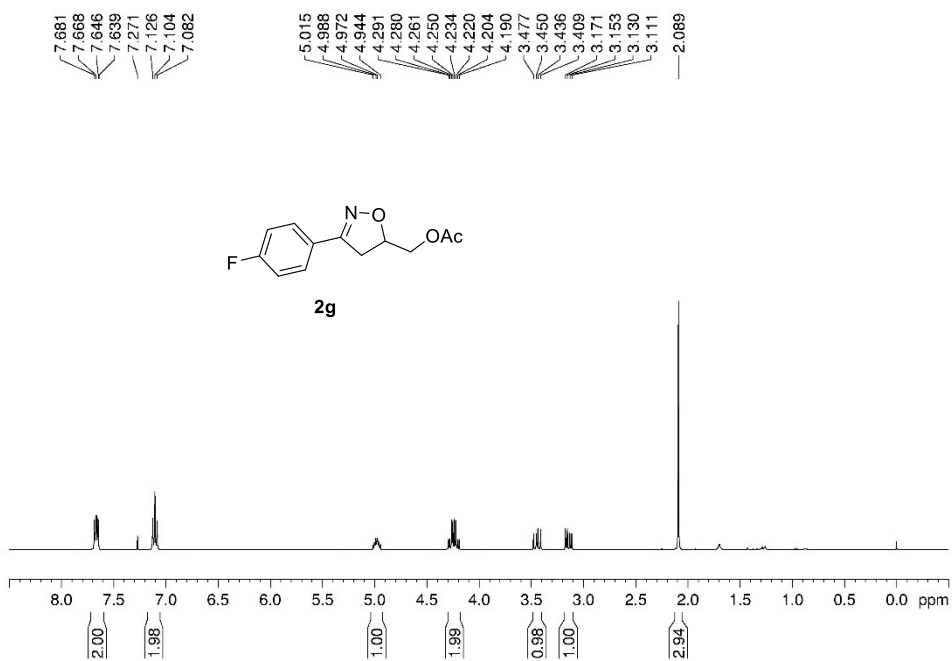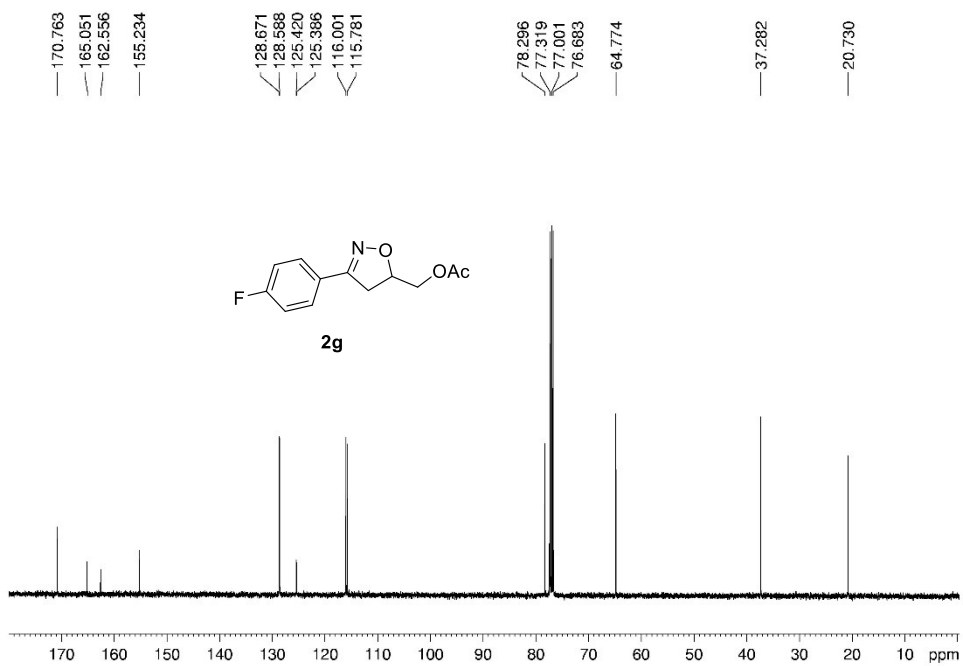

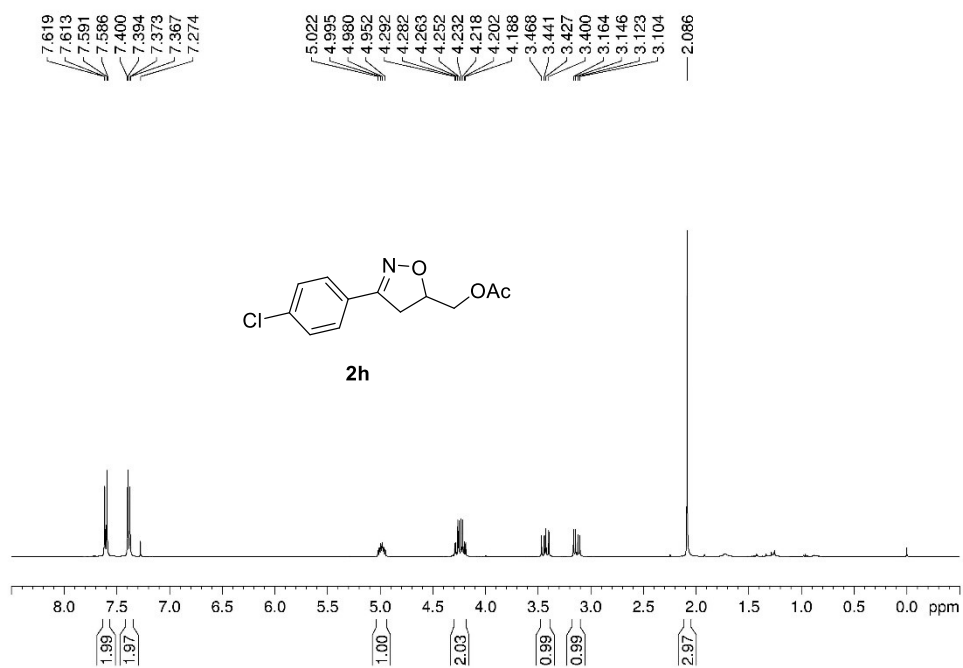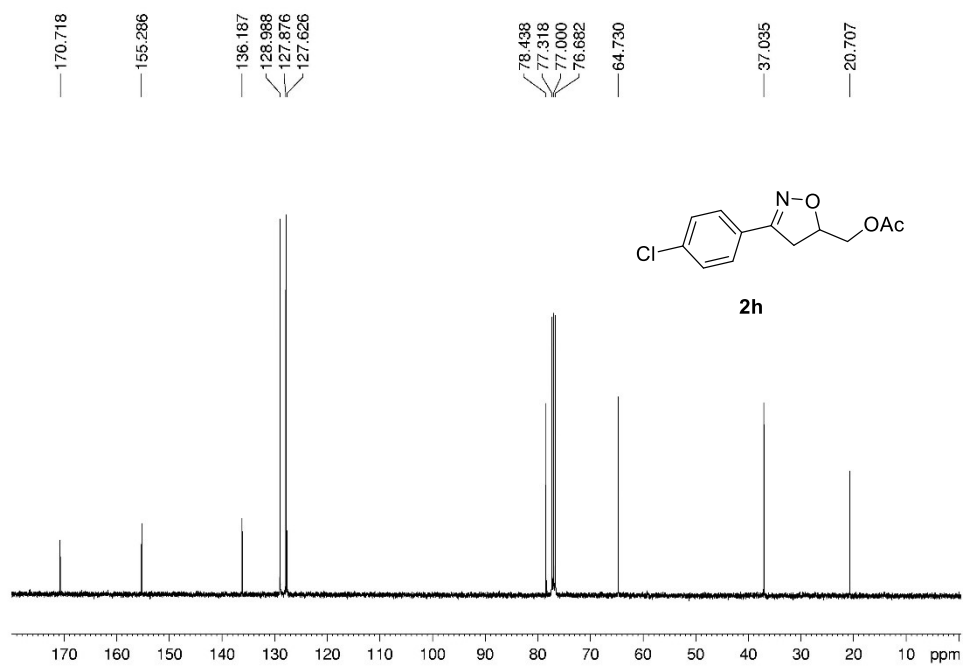

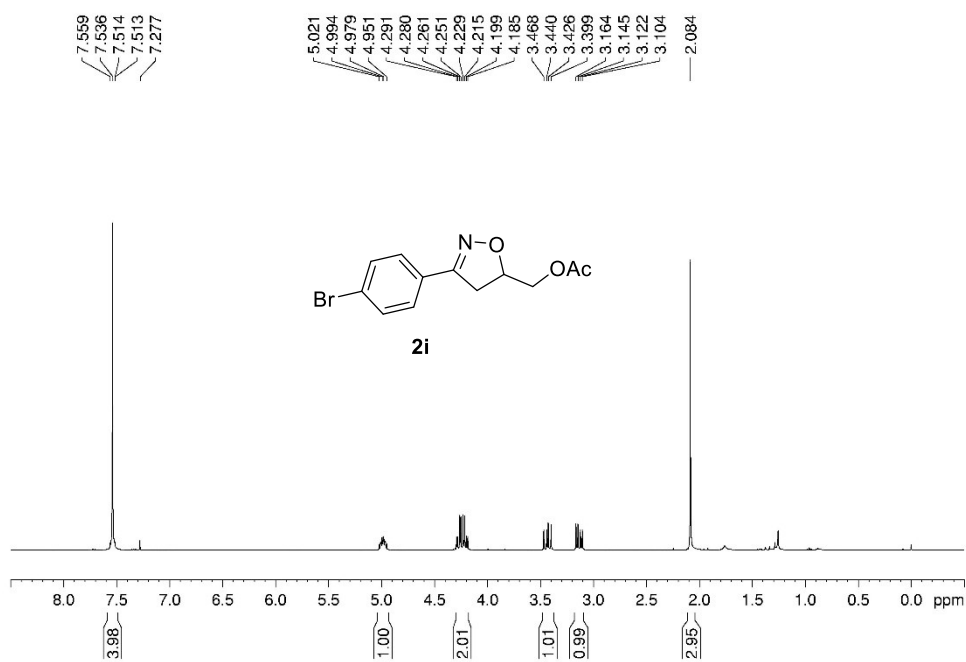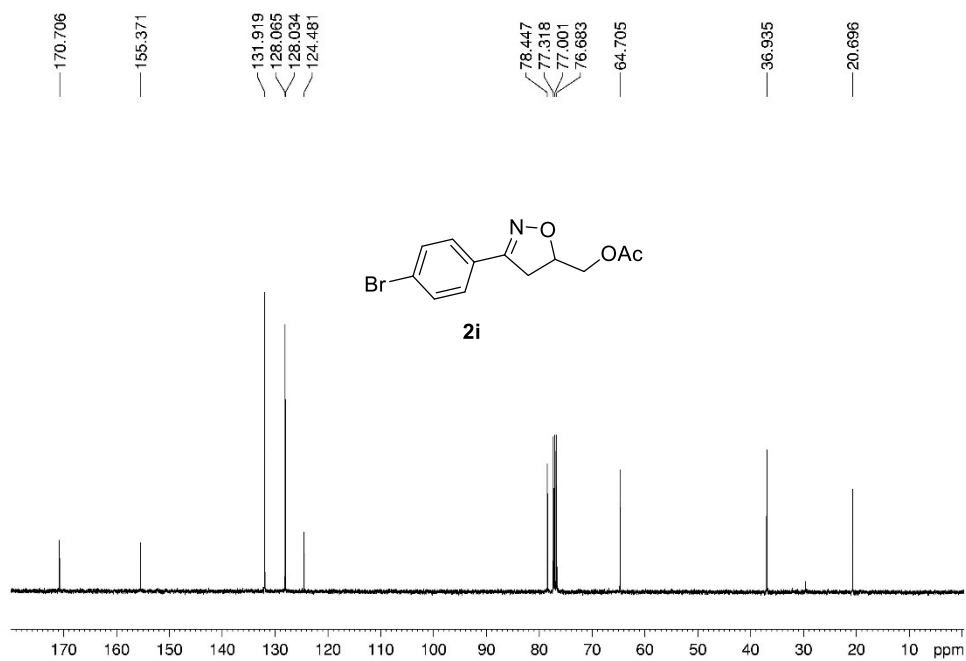



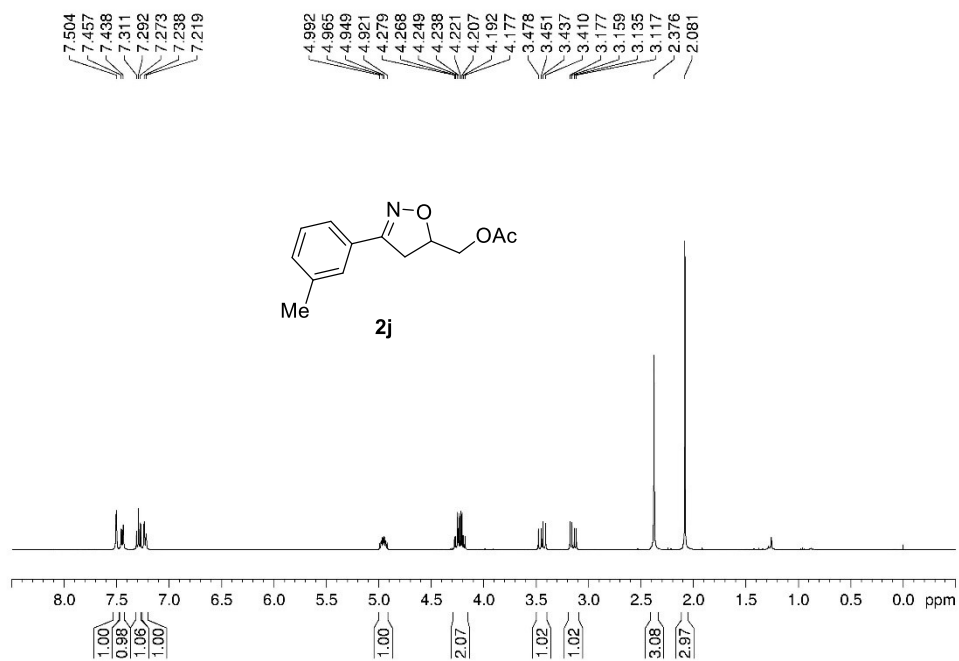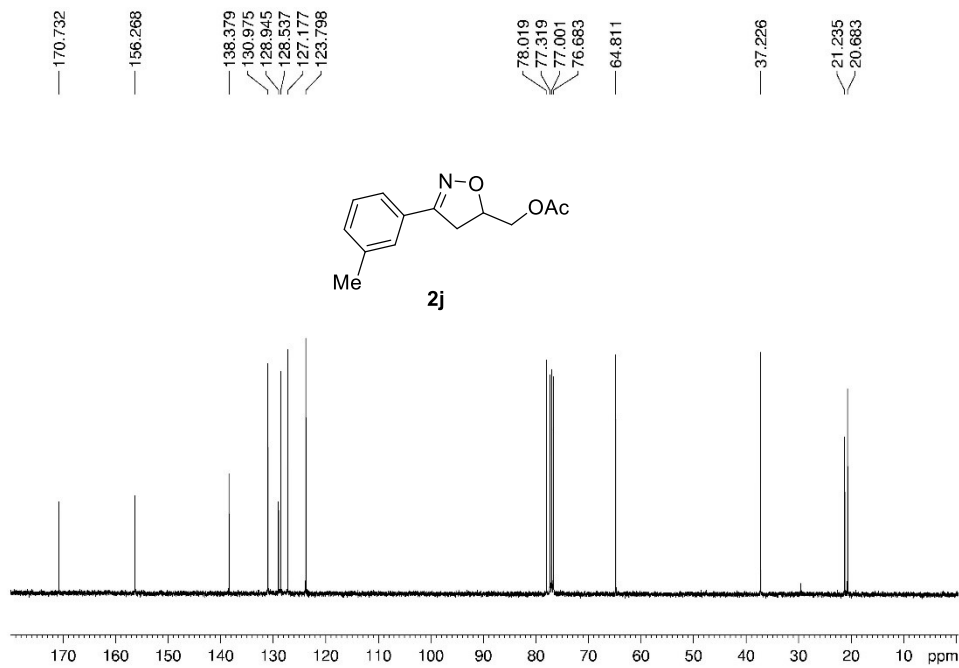

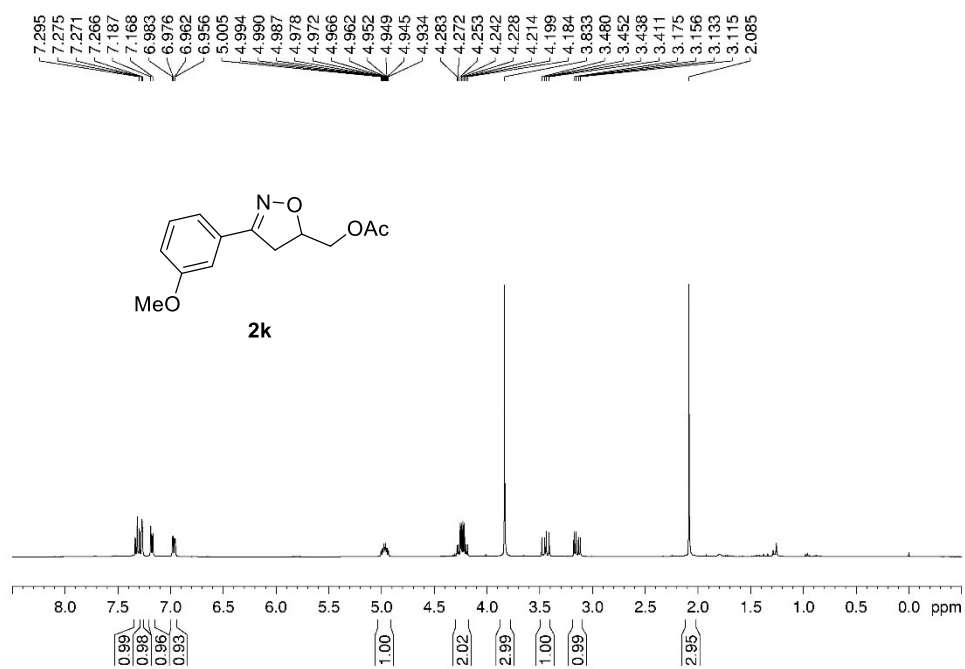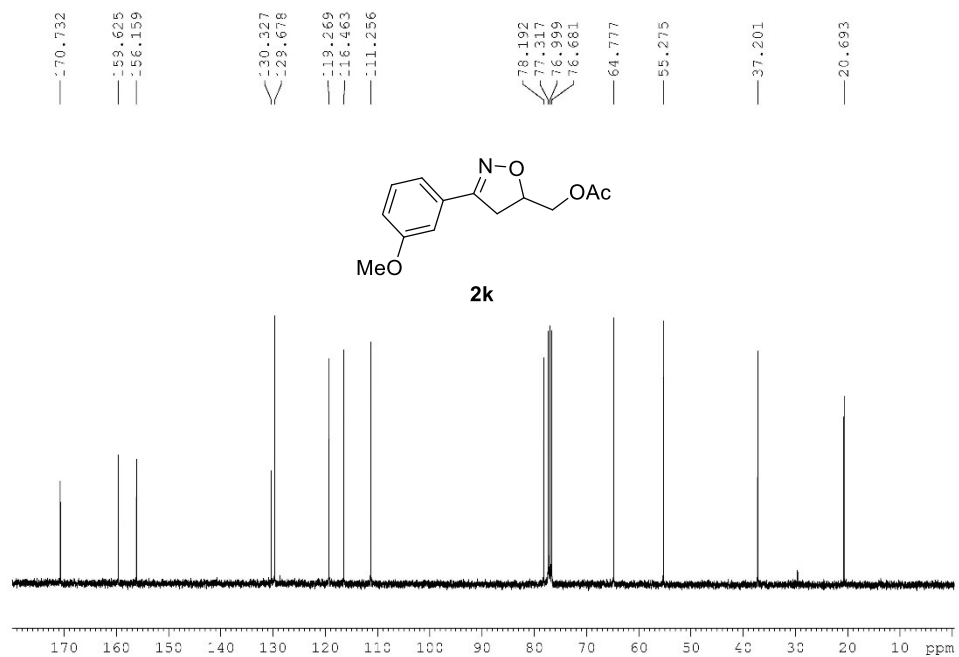

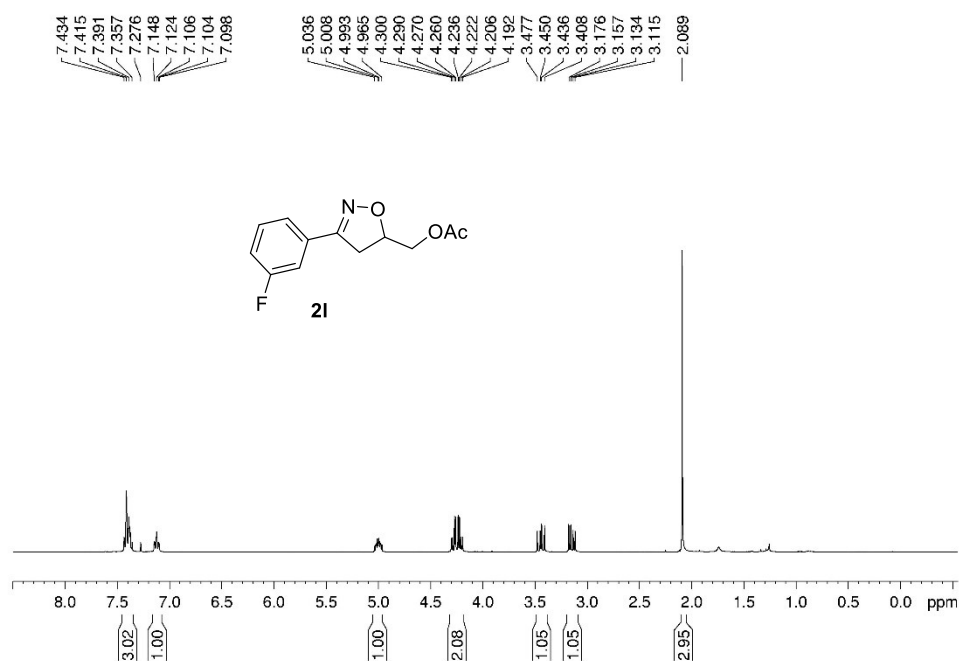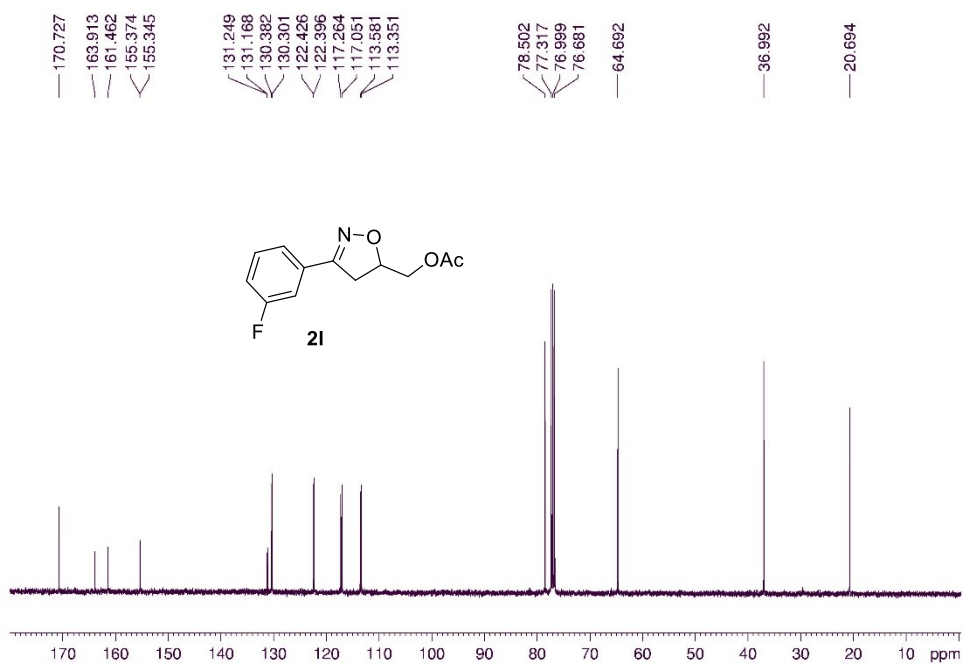

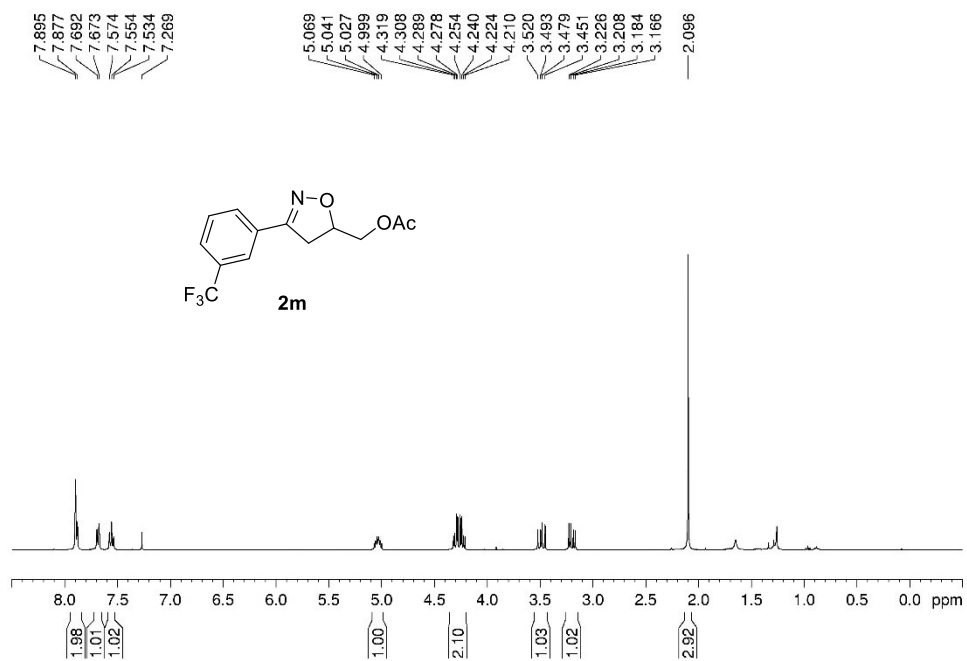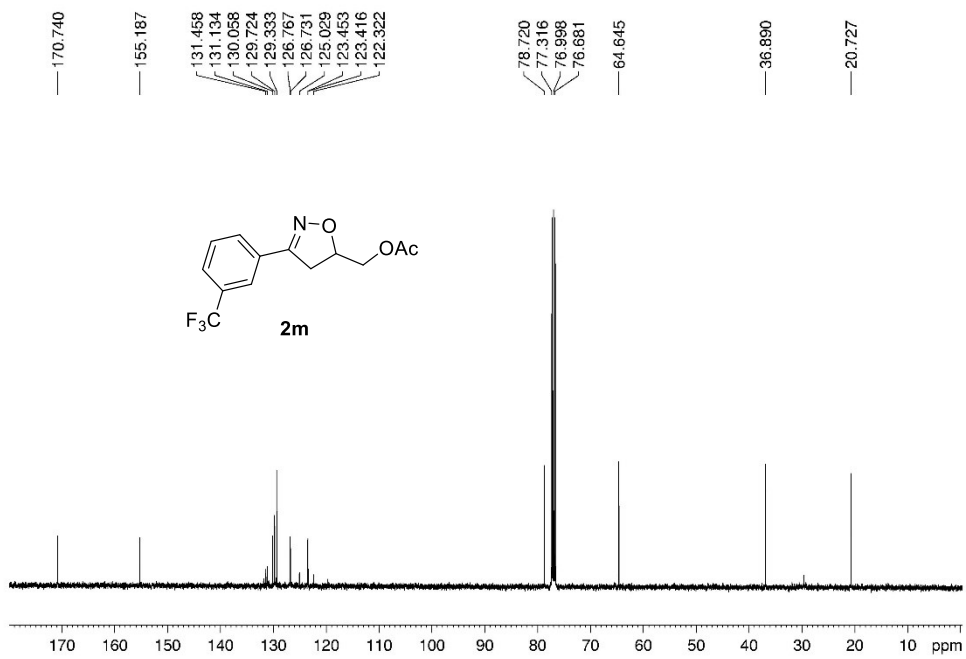

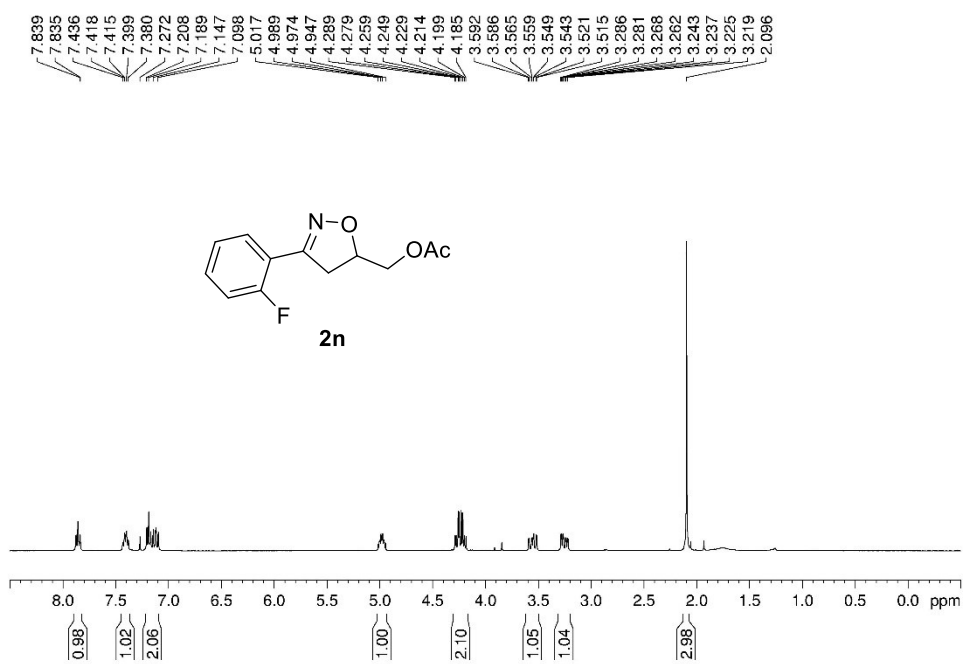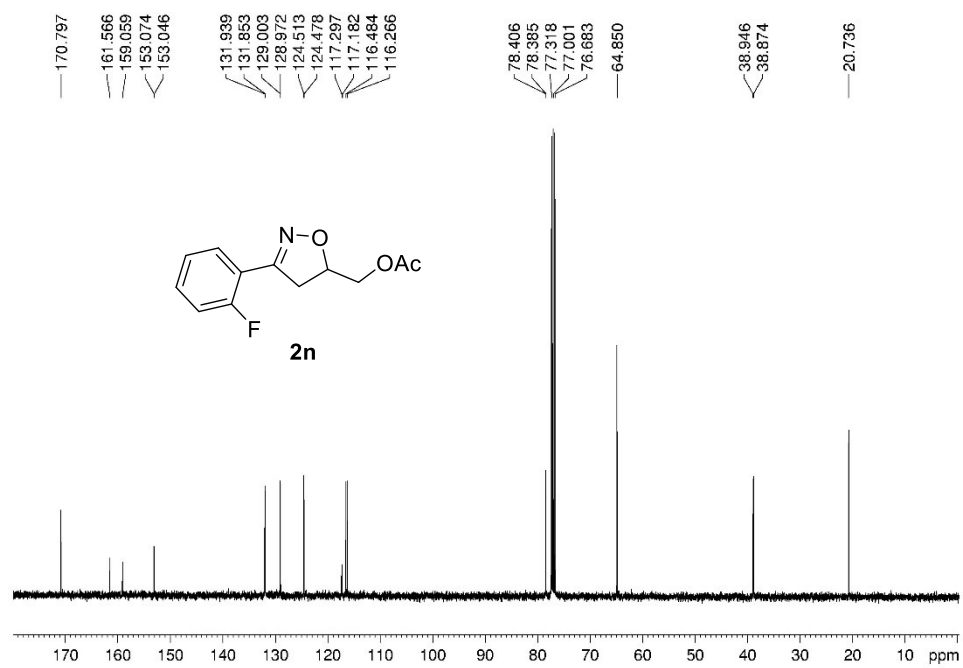

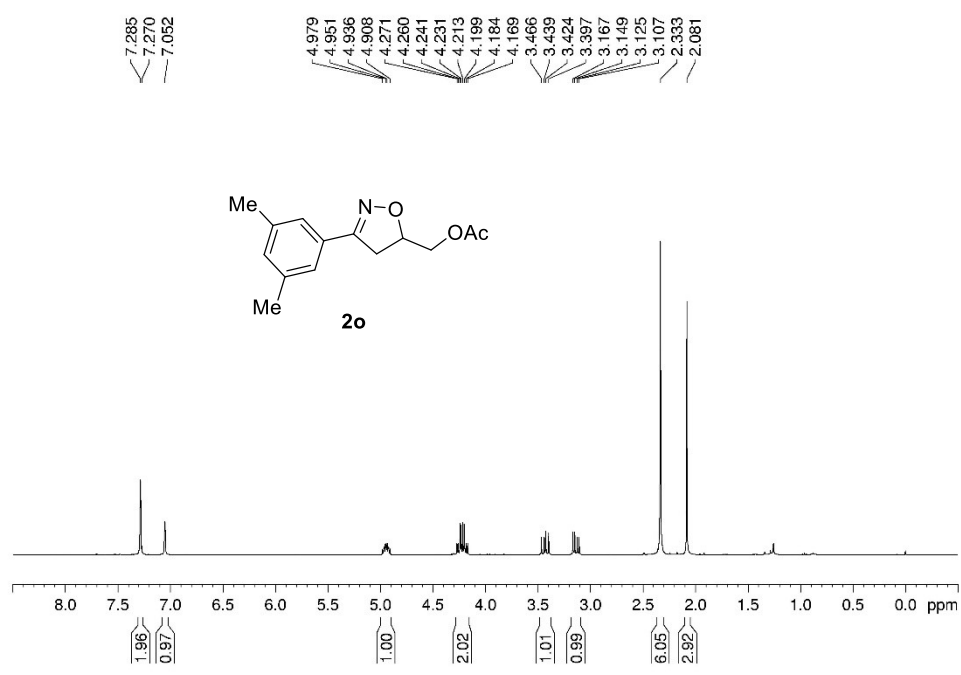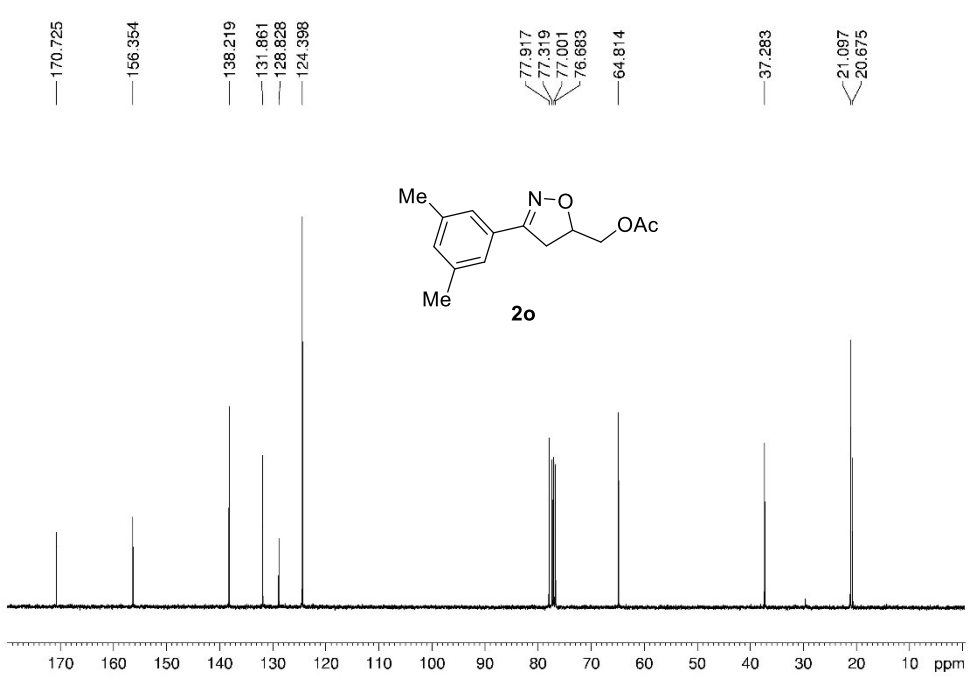

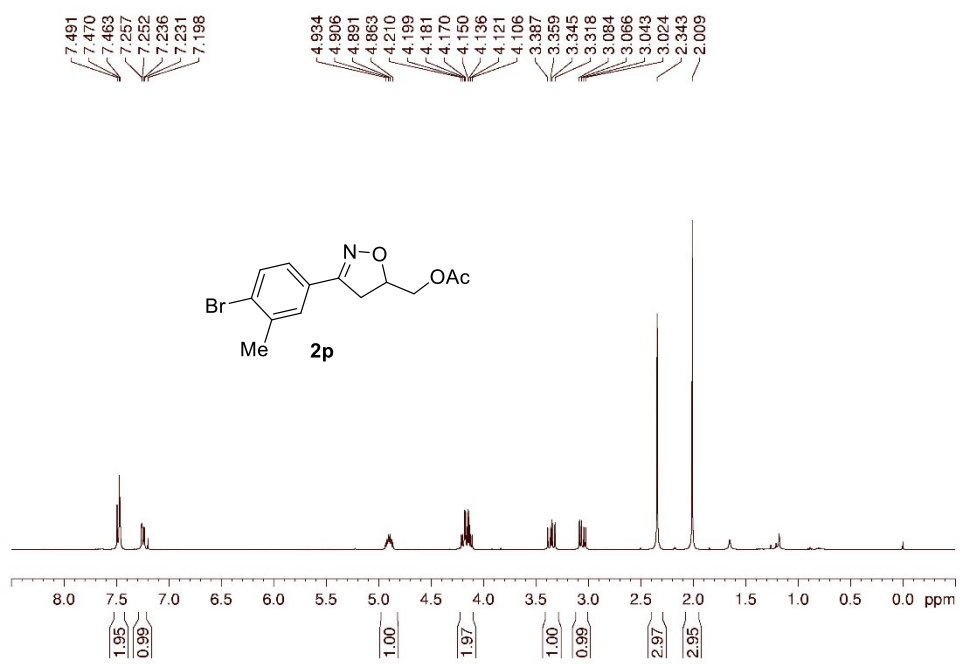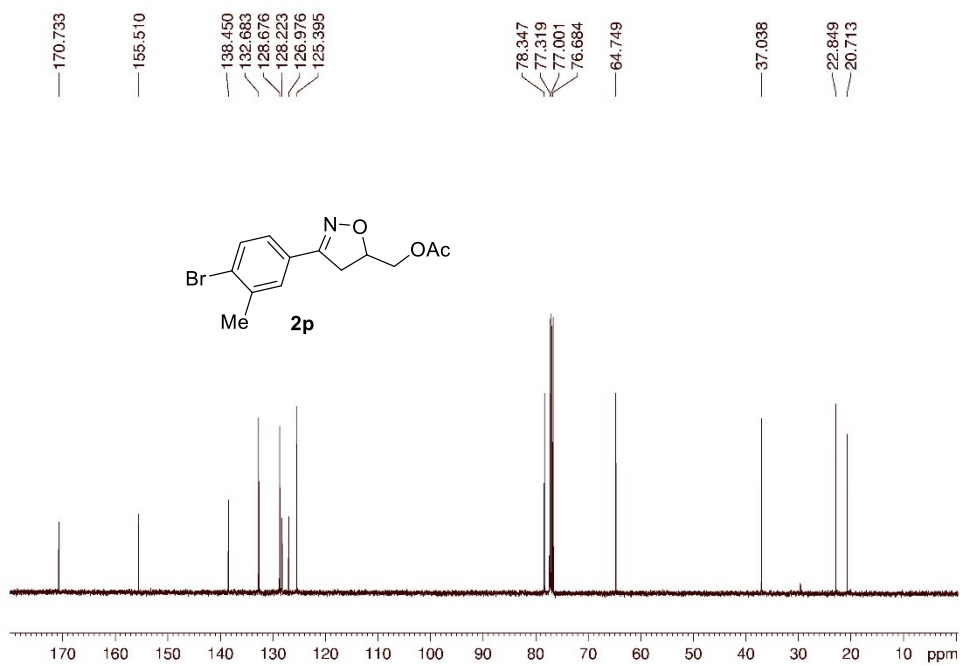

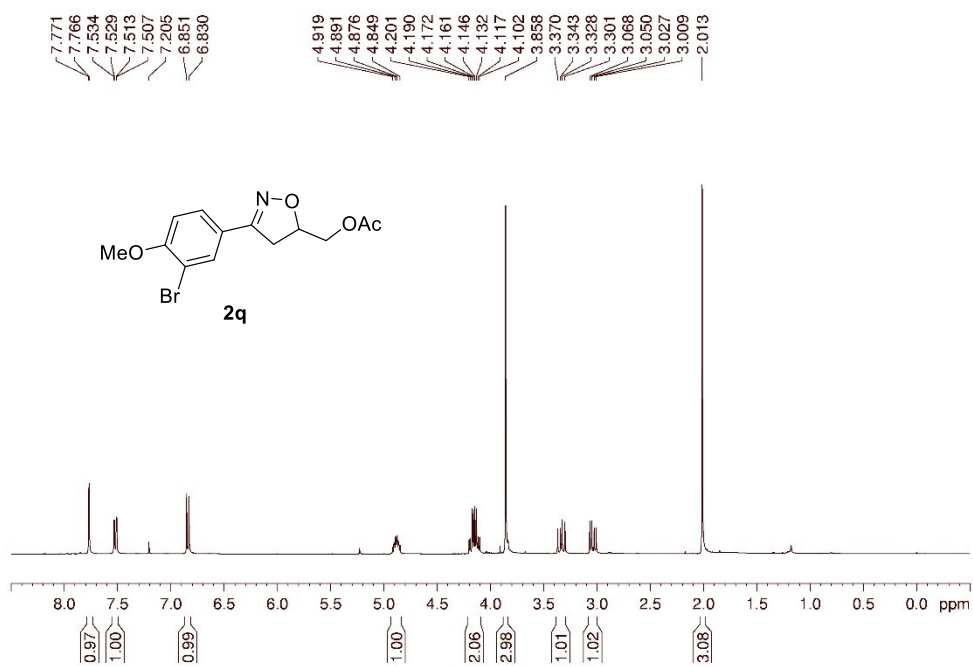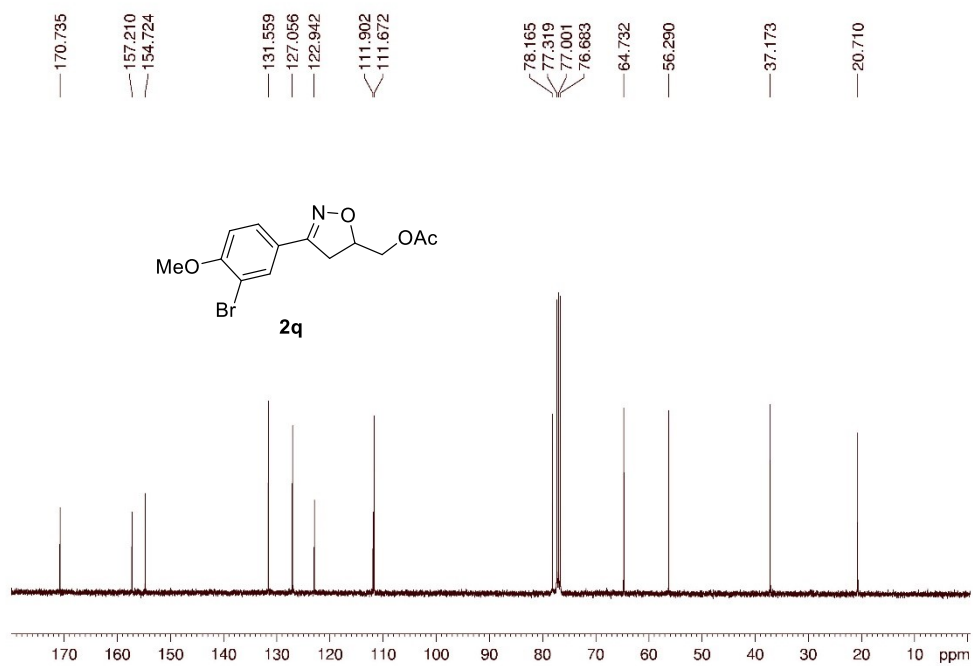



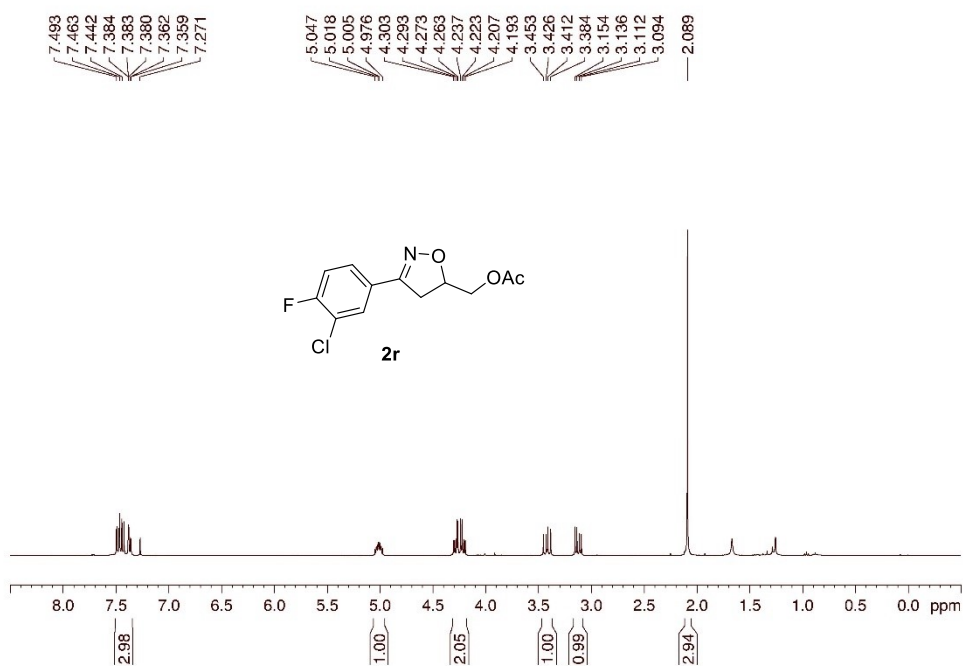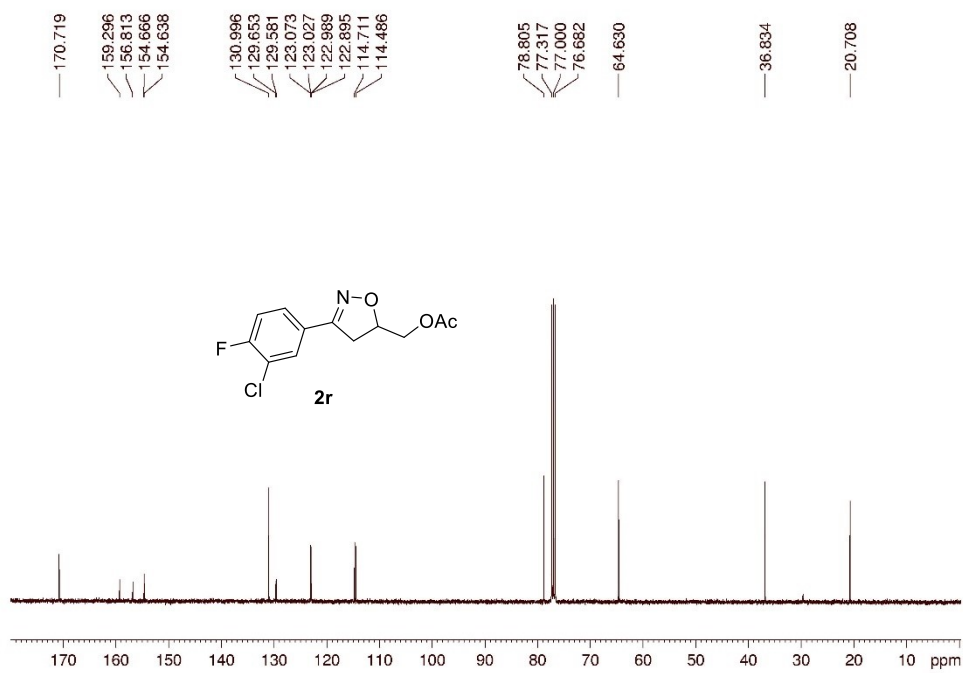

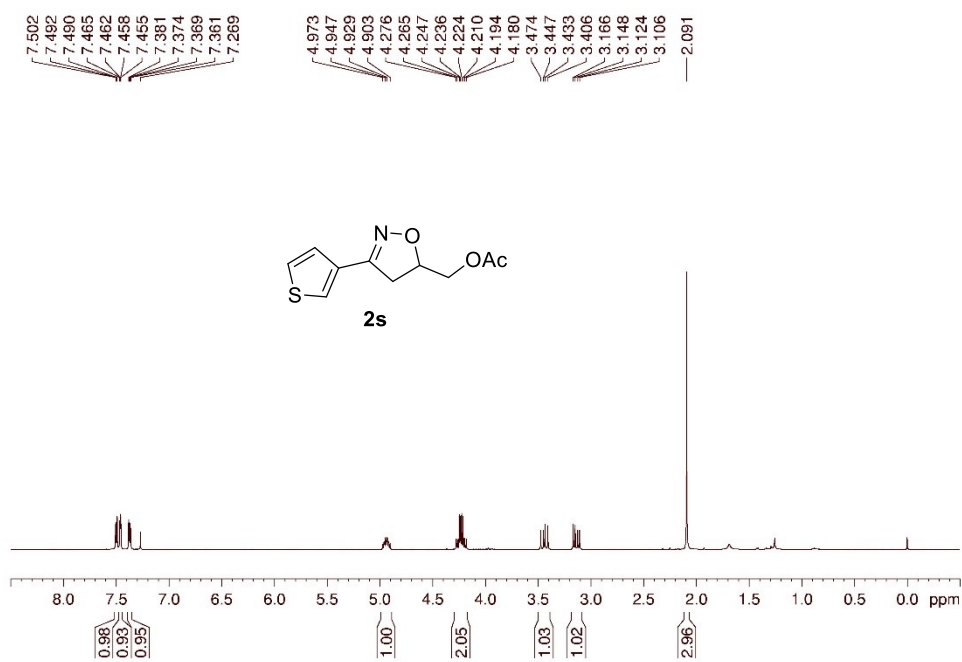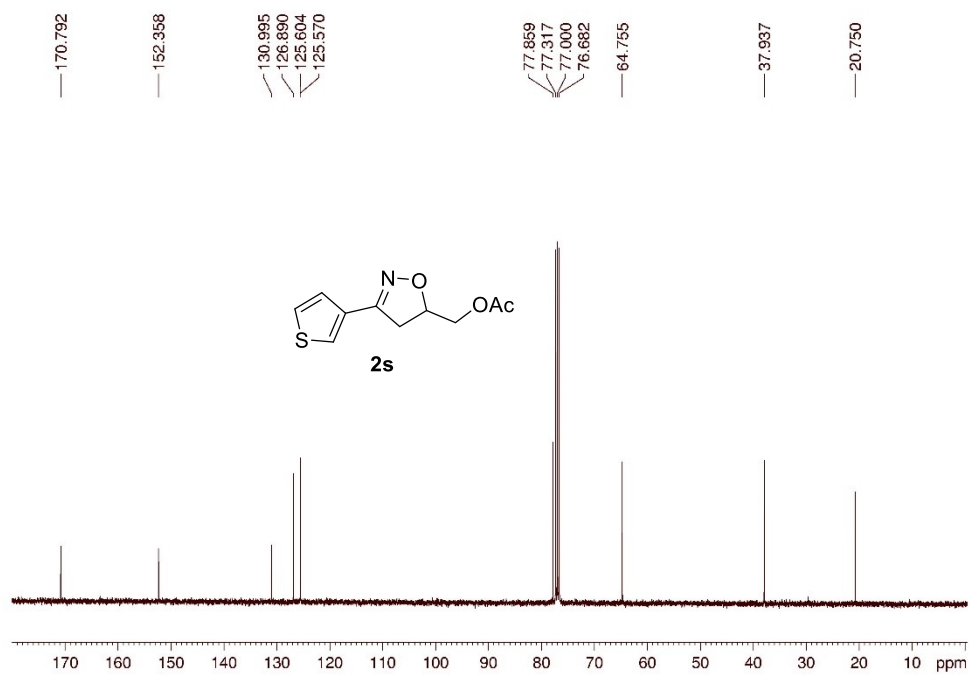

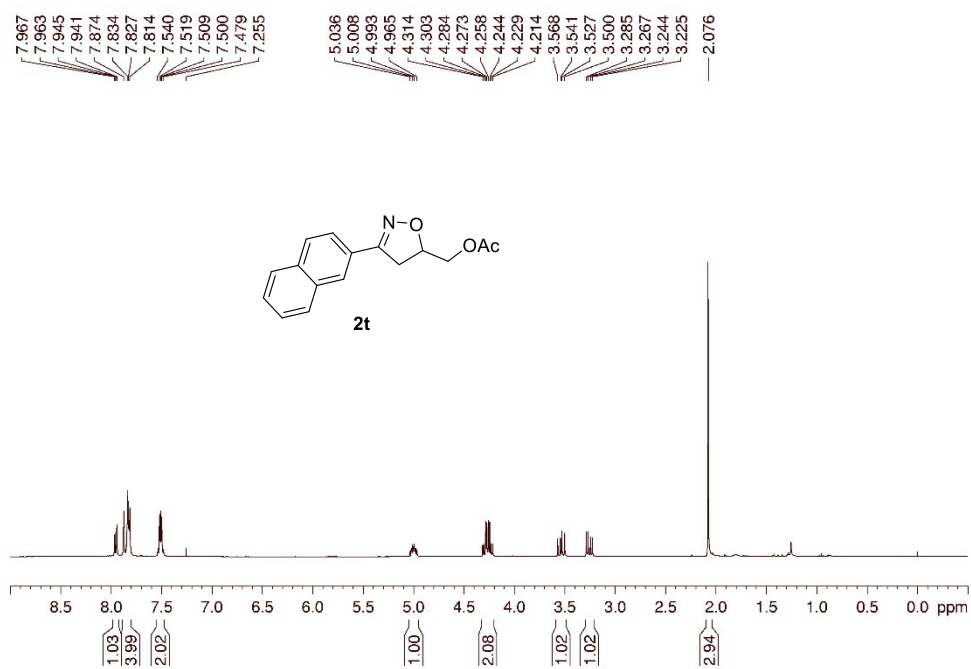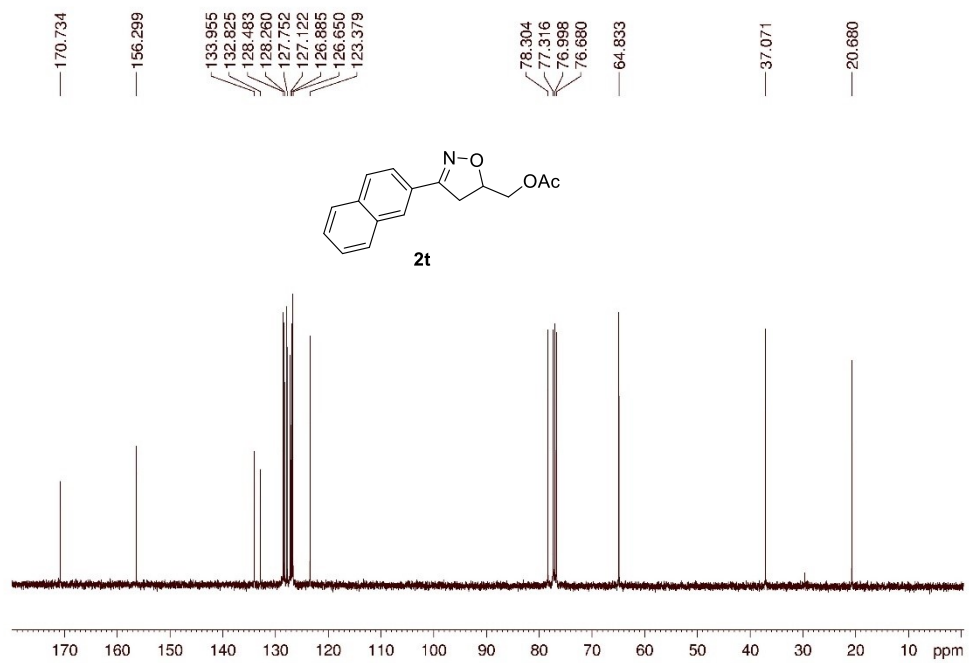

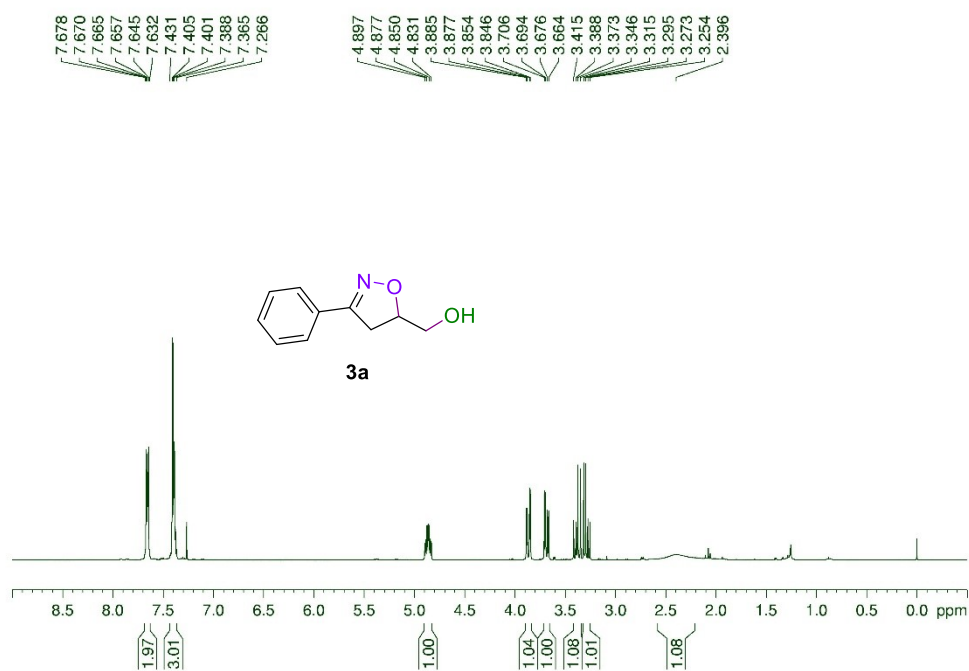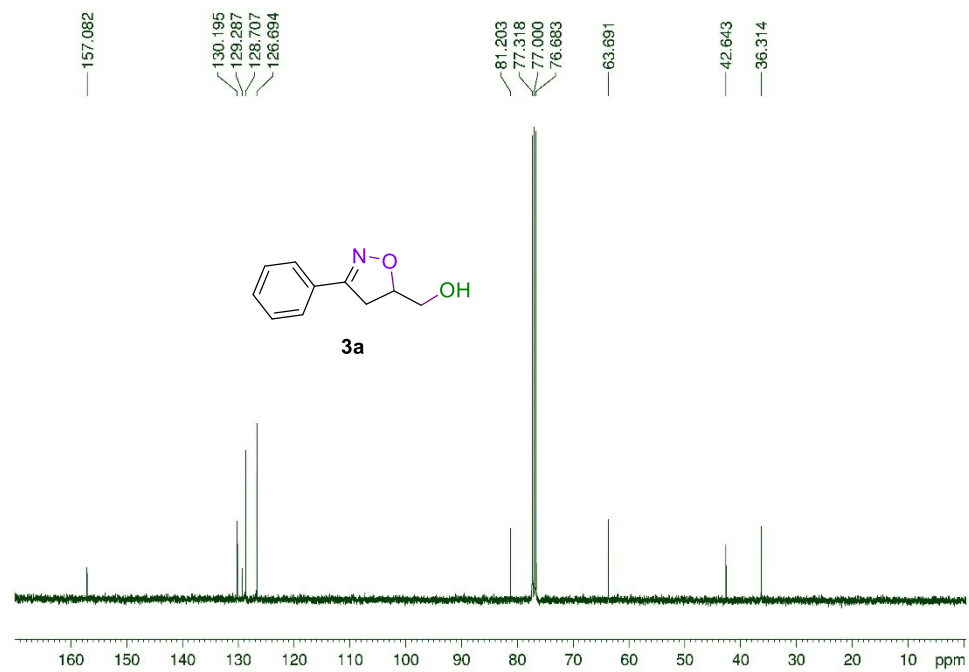

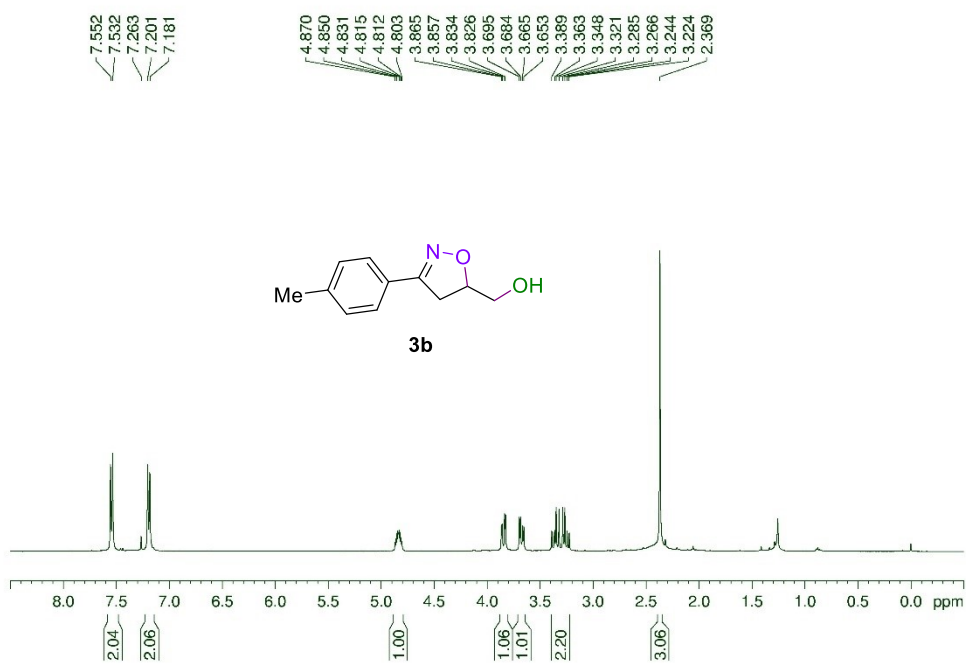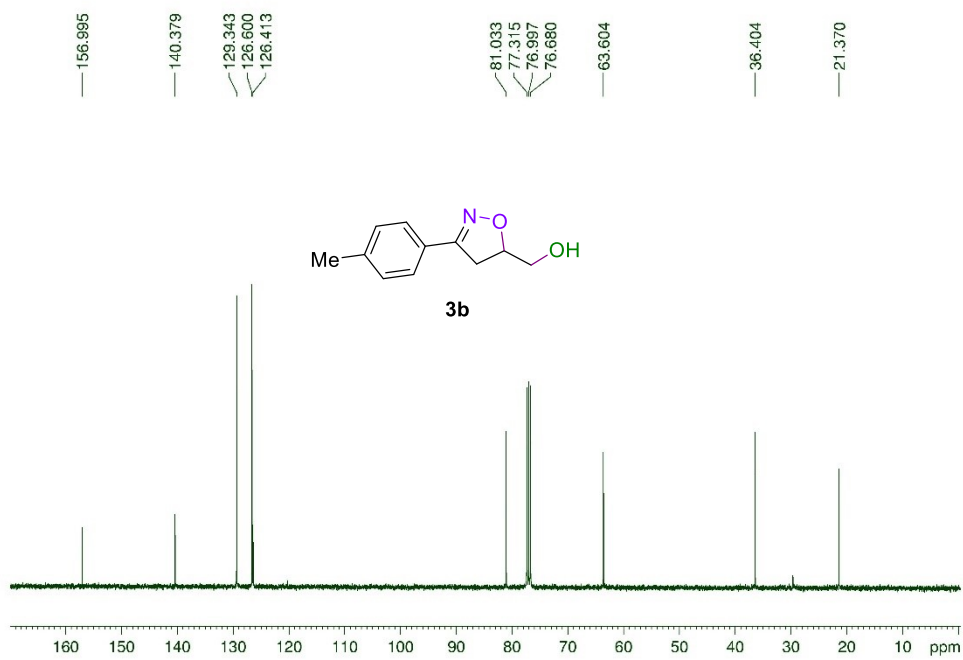

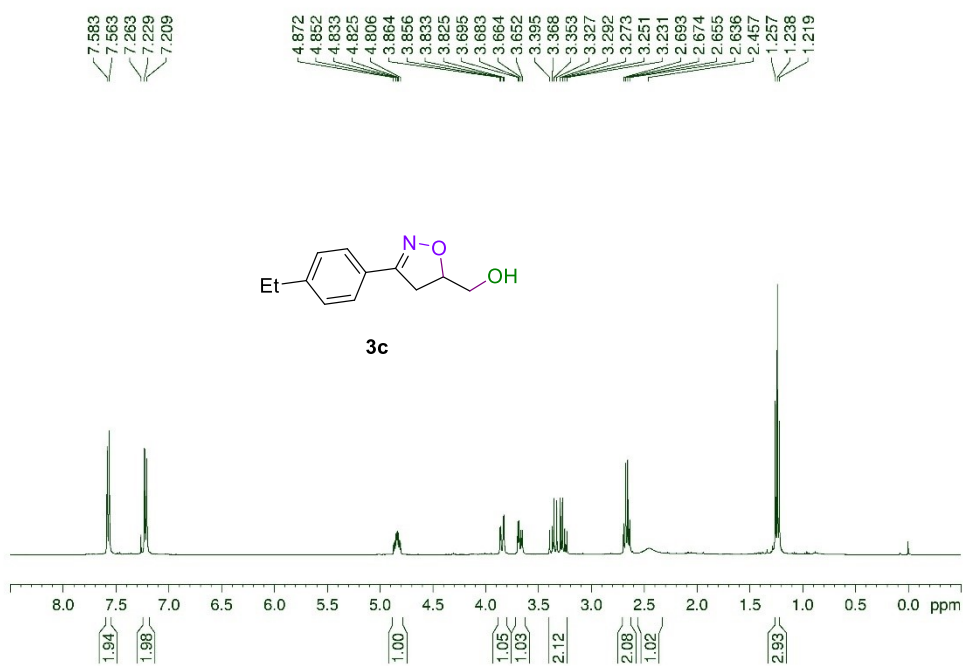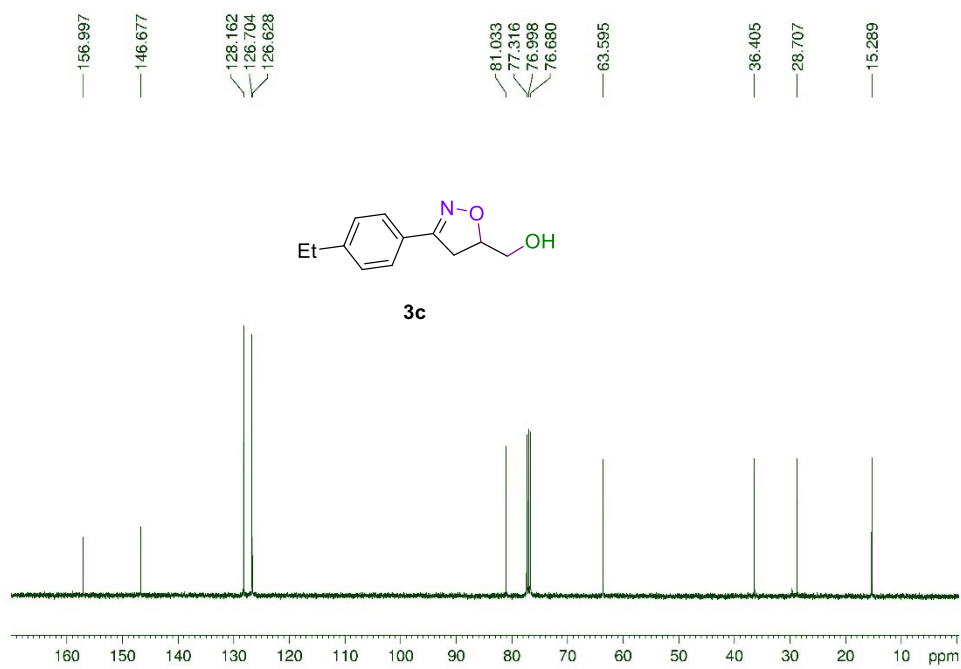

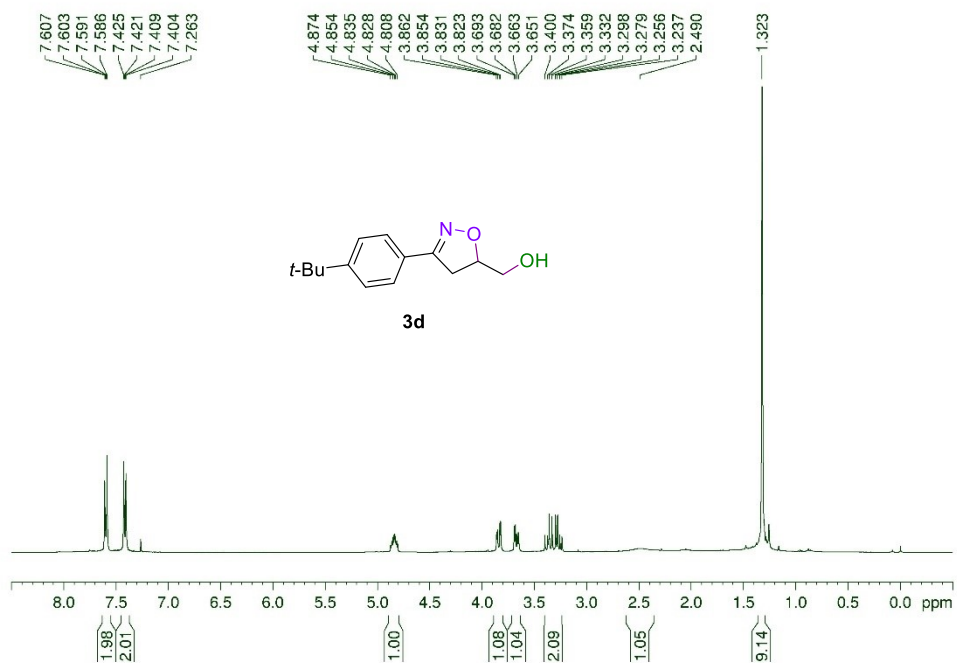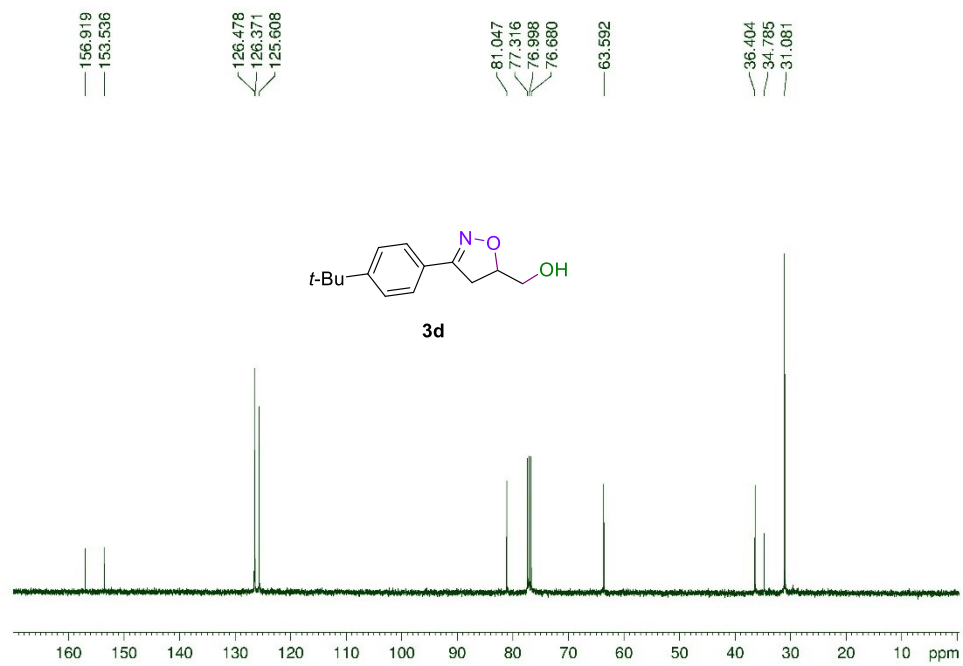

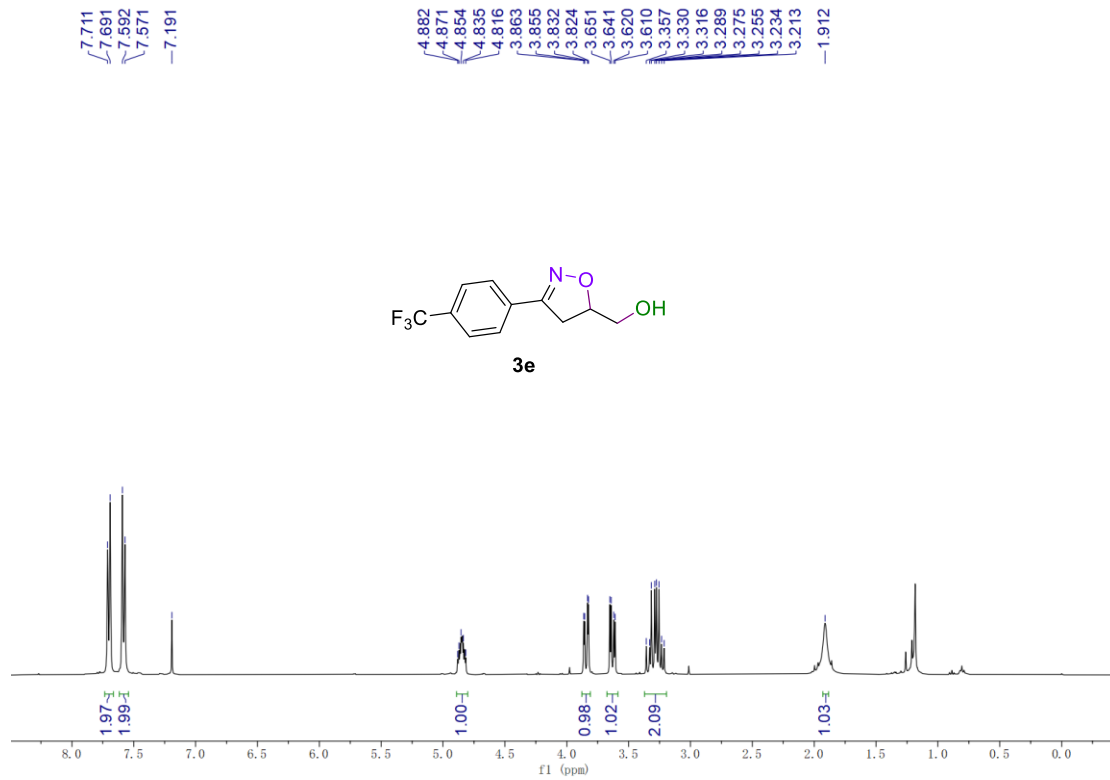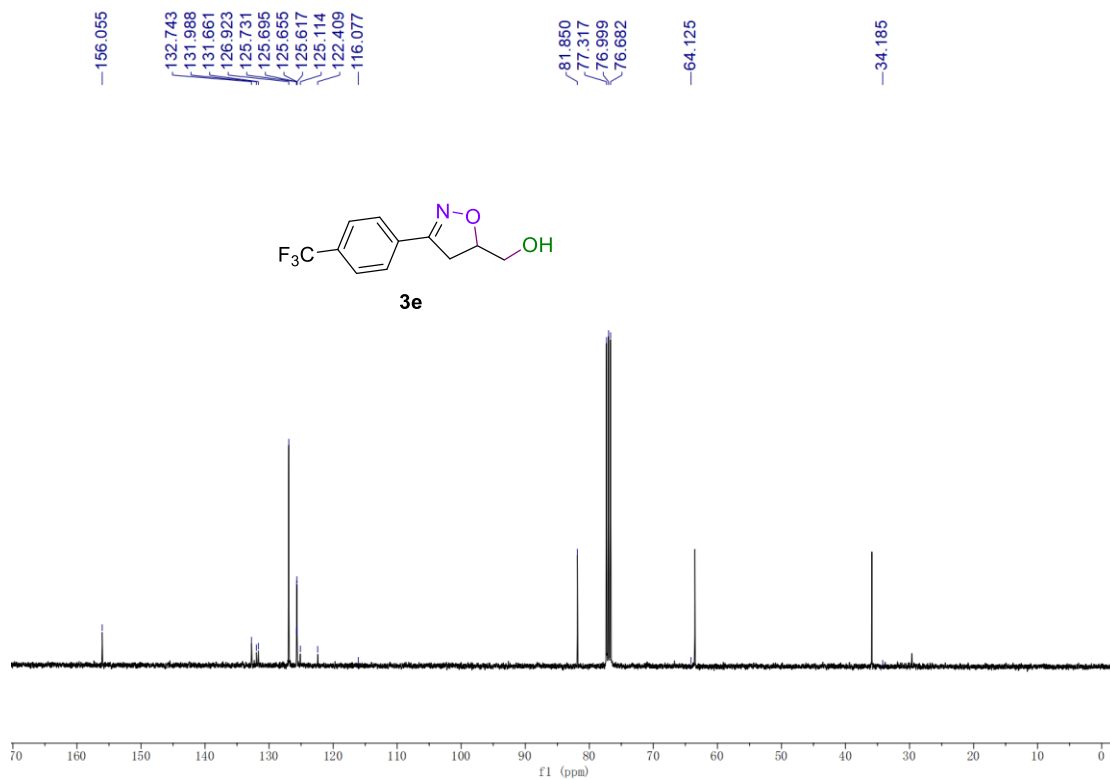



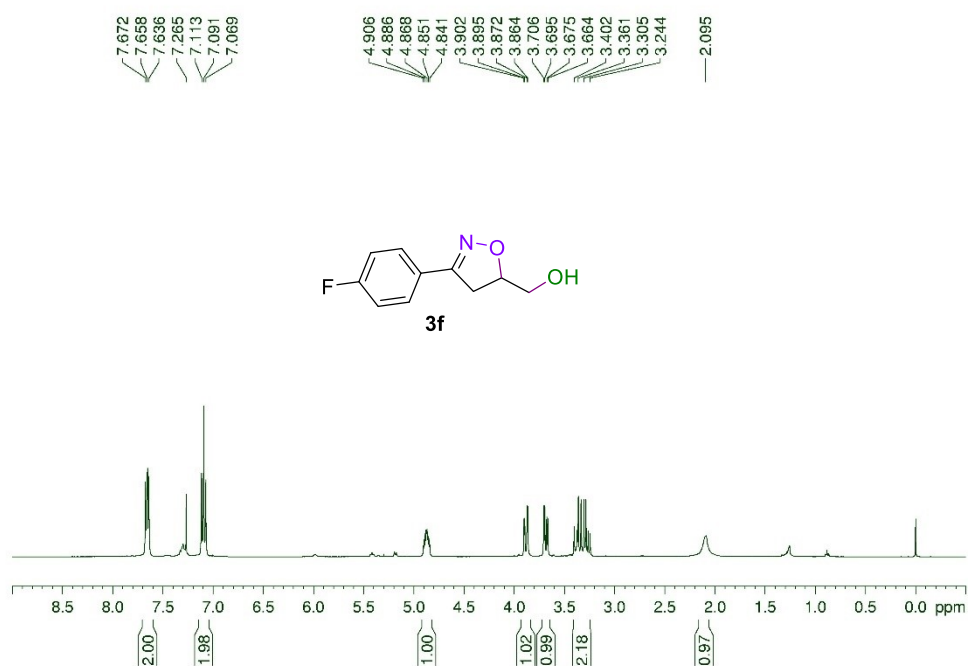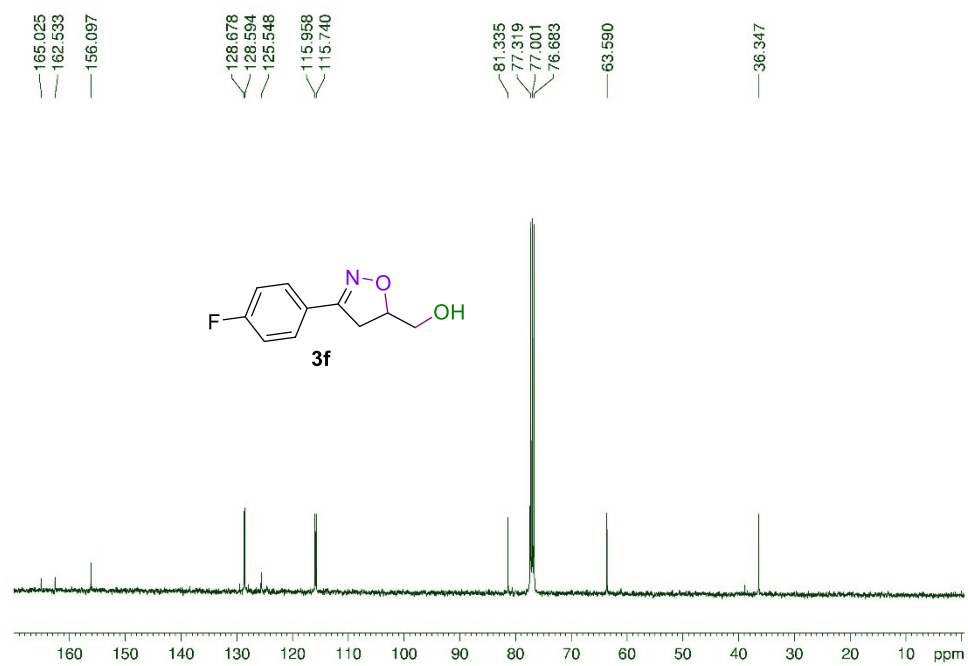

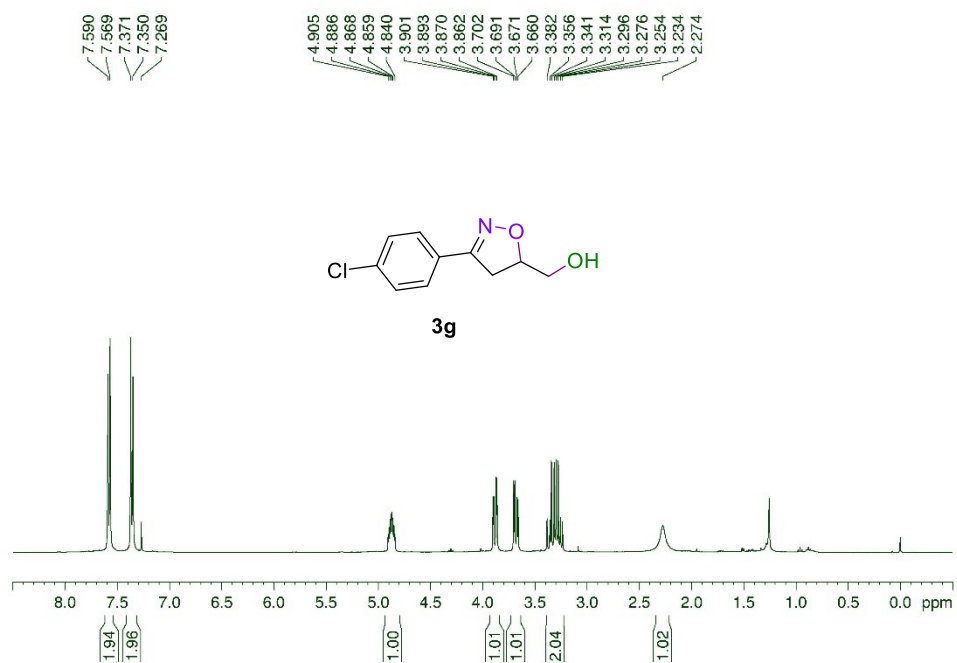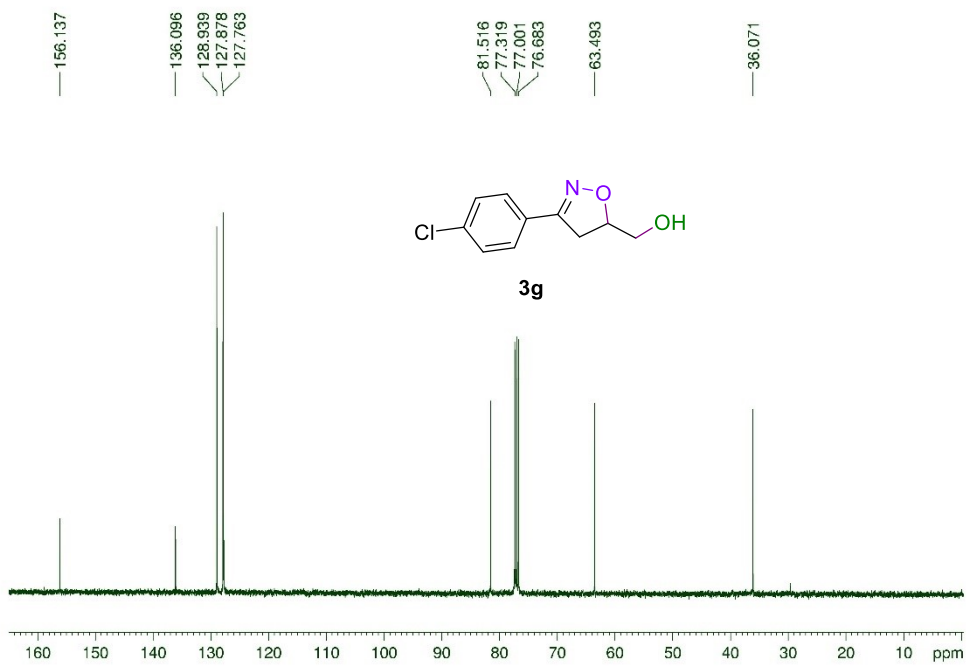

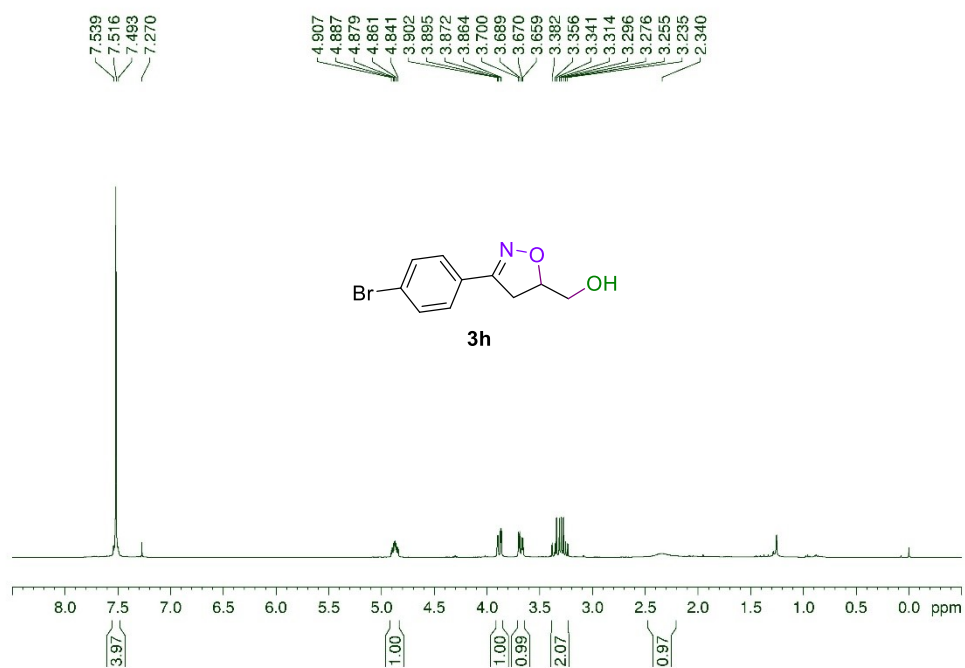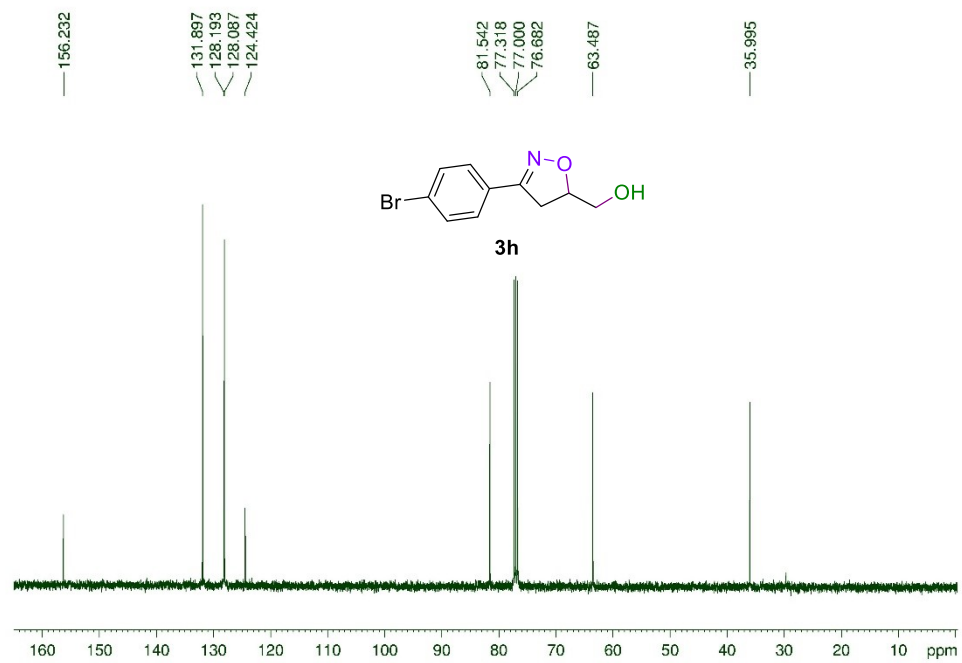

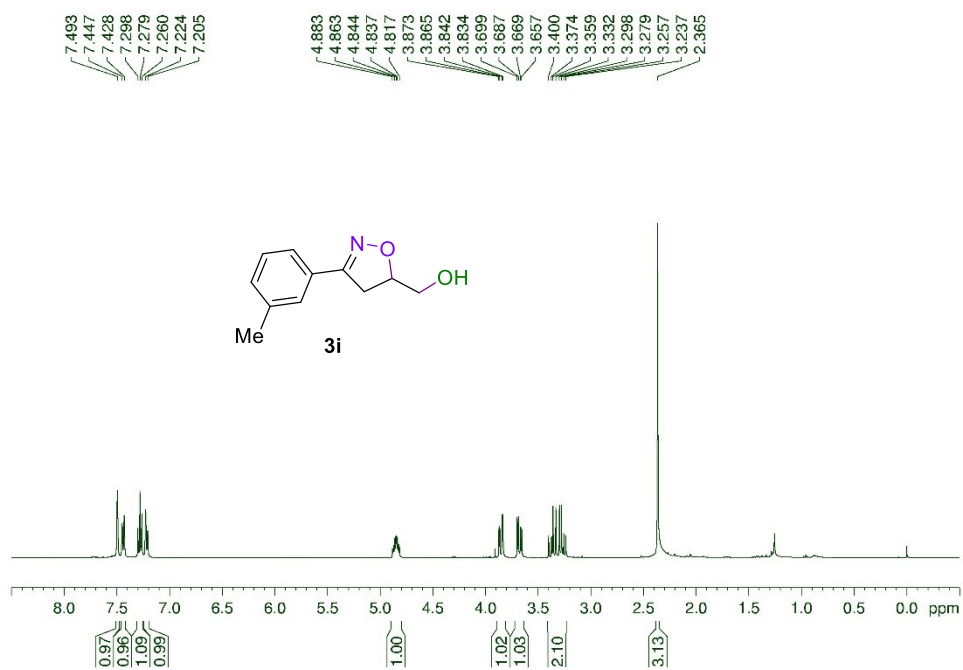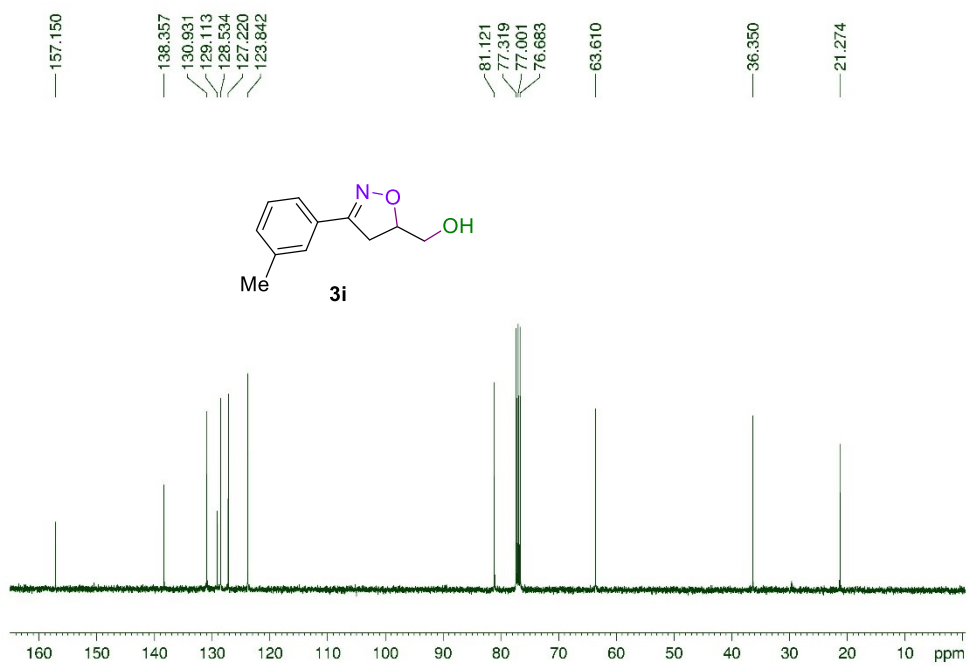

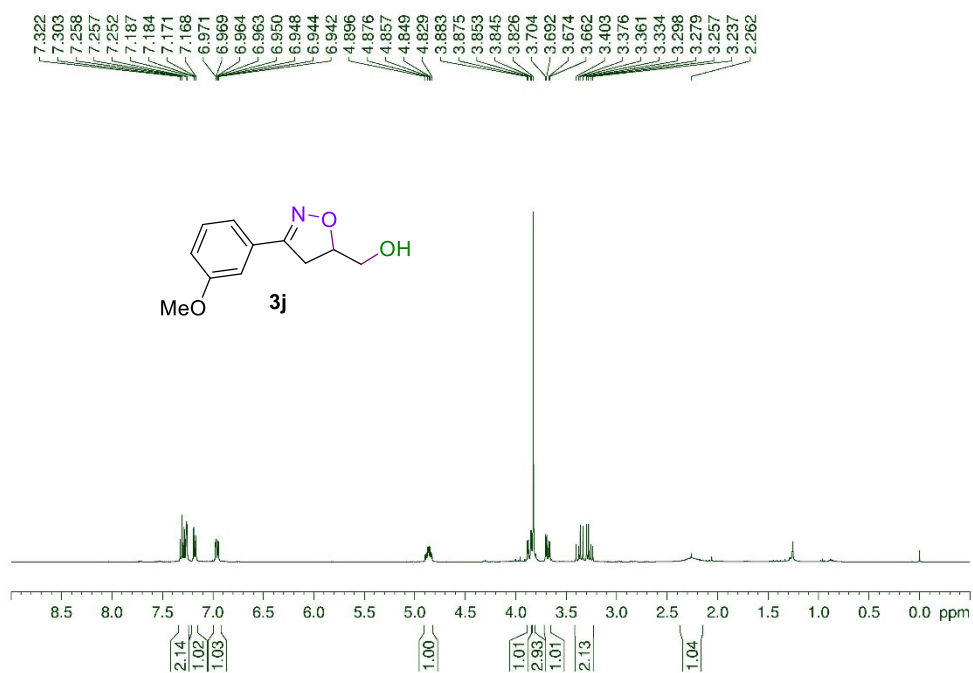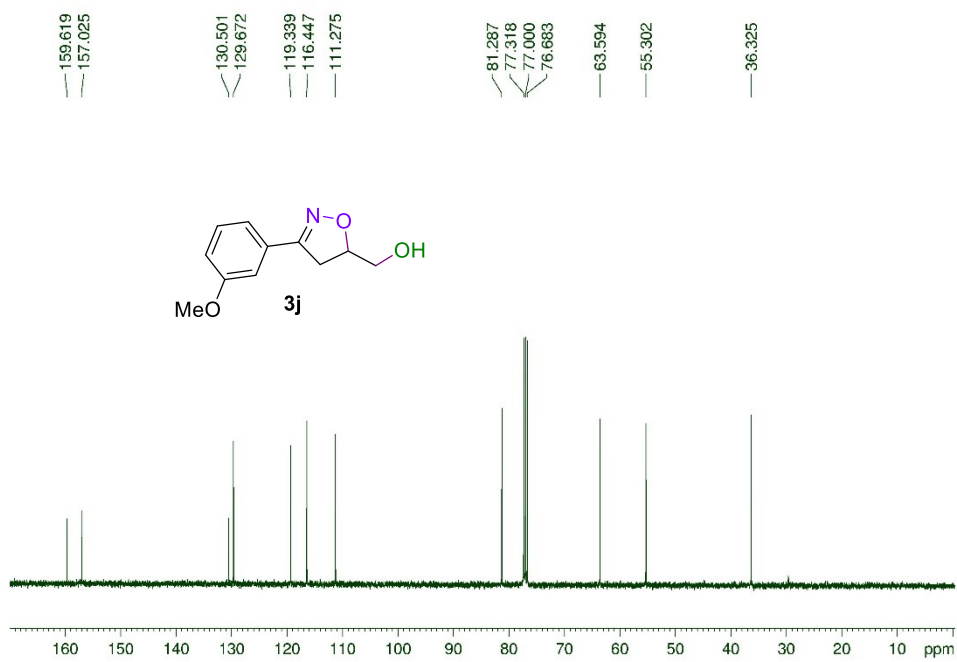

7.892  
7.866  
7.846  
7.668  
7.648  
7.547  
7.527  
7.508  
7.269

4.956  
4.937  
4.918  
4.891  
3.935  
3.927  
3.904  
3.896  
3.725  
3.714  
3.694  
3.683  
3.442  
3.416  
3.401  
3.374  
3.361  
3.341  
3.319  
3.299  
2.256

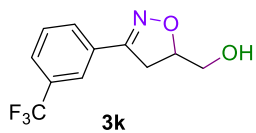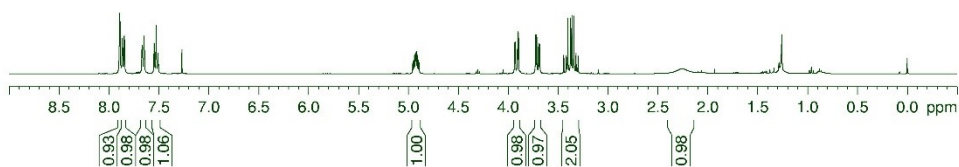

156.008

131.369  
131.043  
130.187  
129.709  
129.259  
126.646  
126.609  
126.573  
125.041  
123.487  
123.447  
123.409  
123.372  
122.334

81.776  
77.319  
77.001  
76.683

63.502

35.906

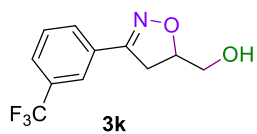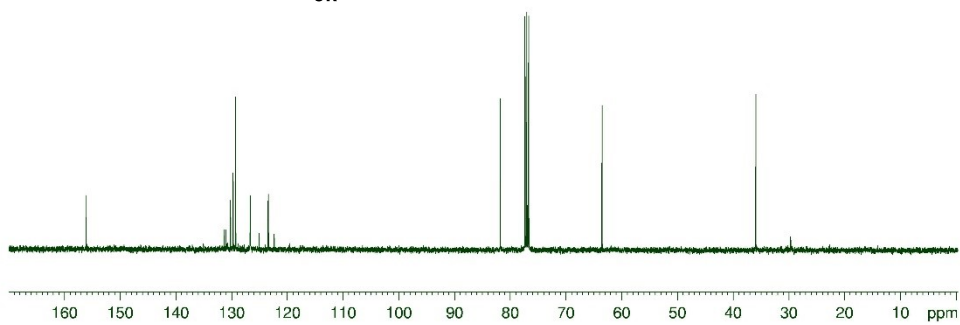

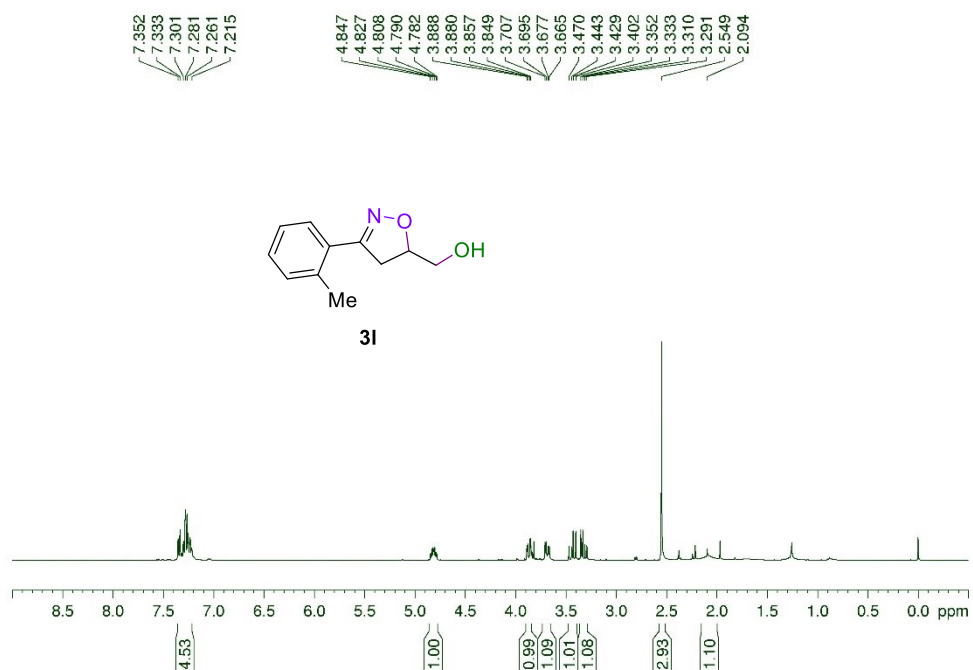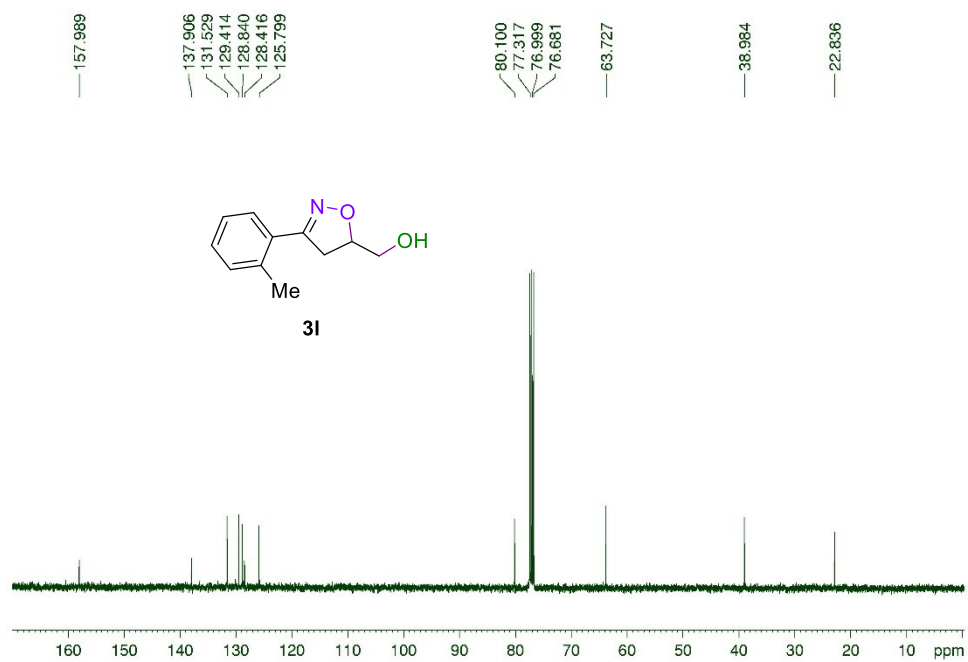

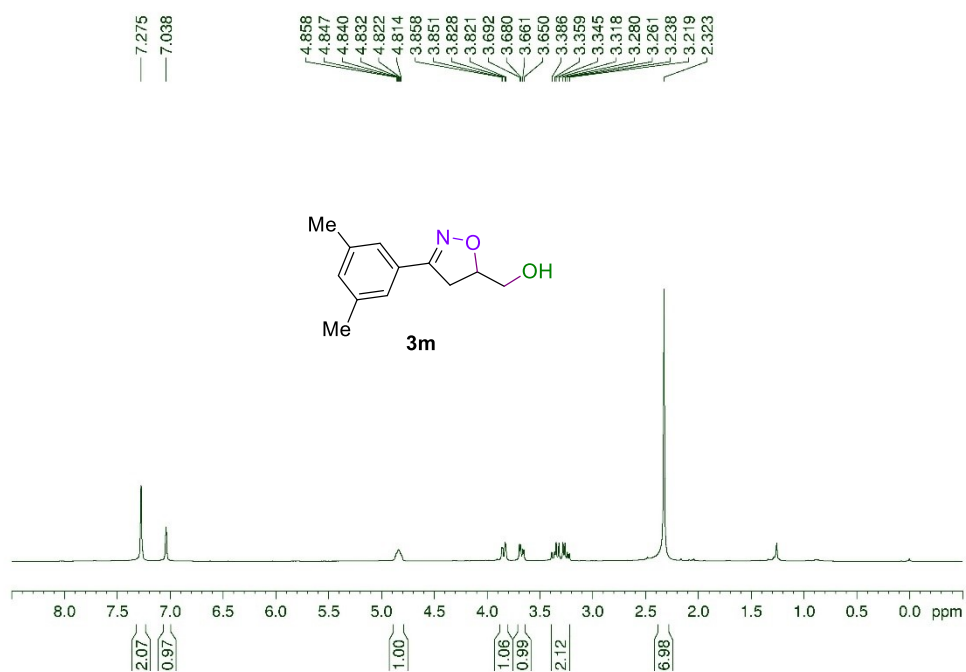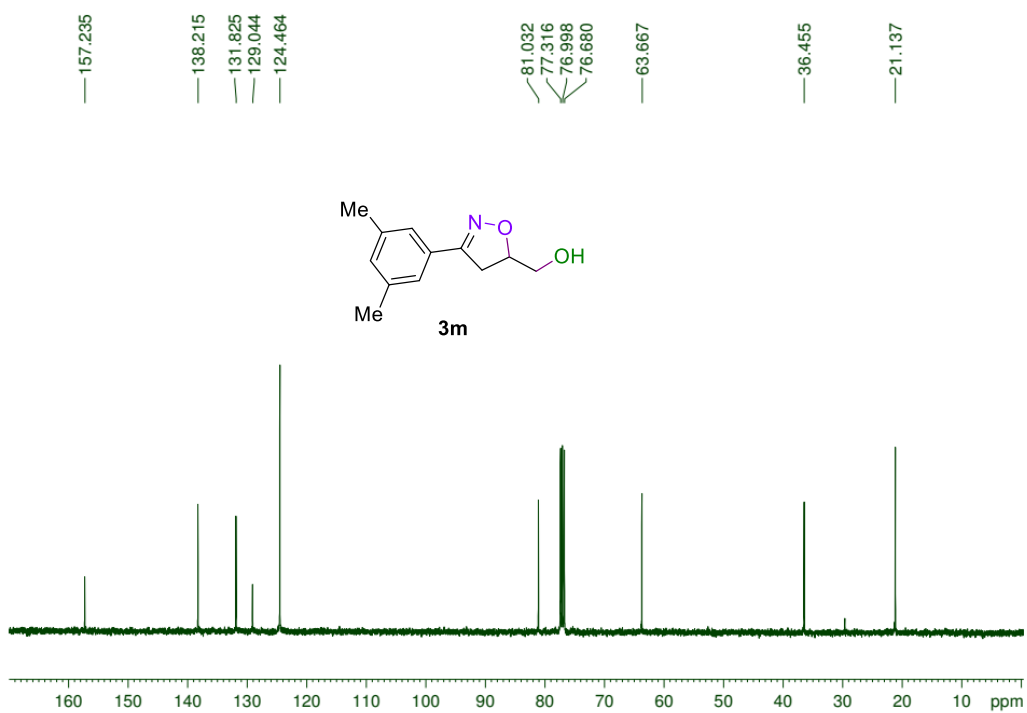



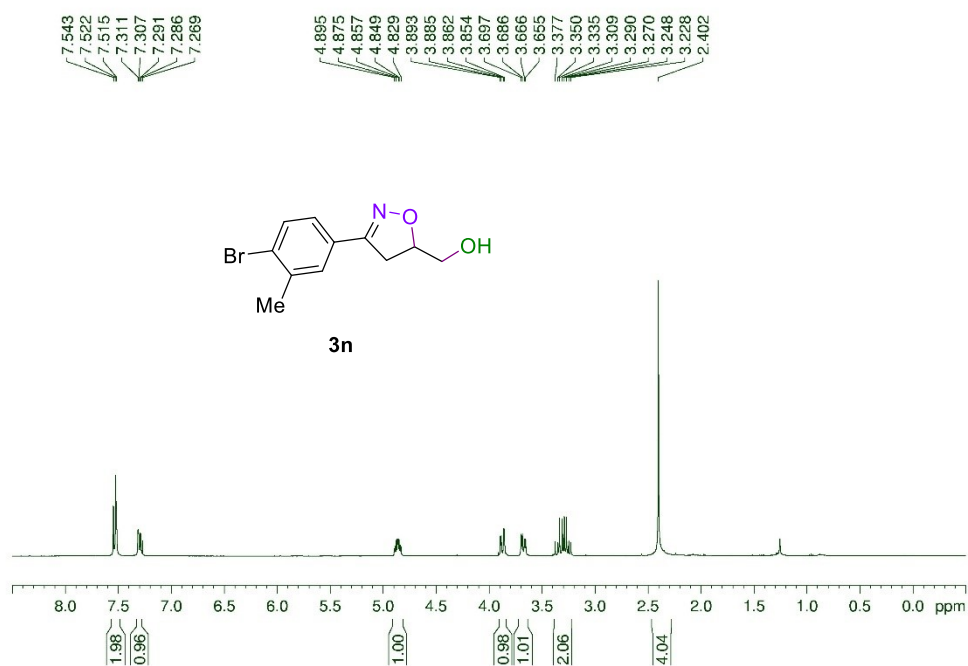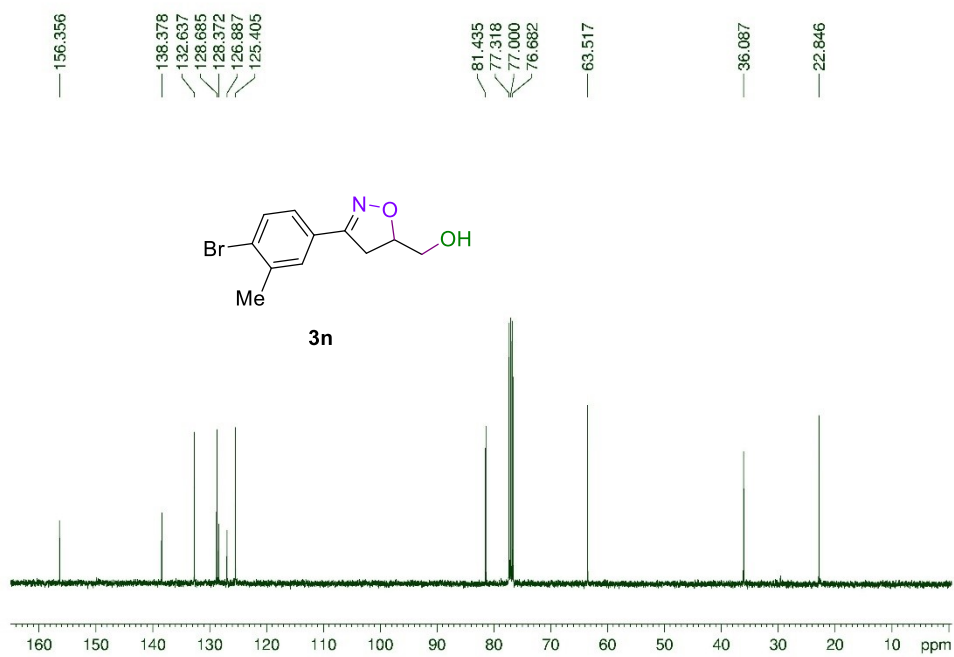

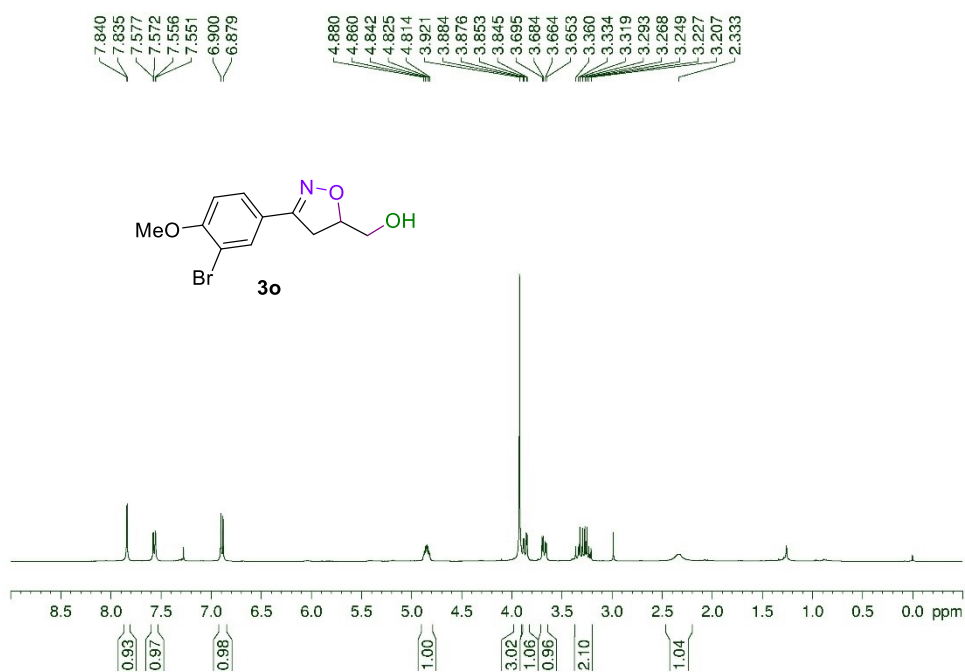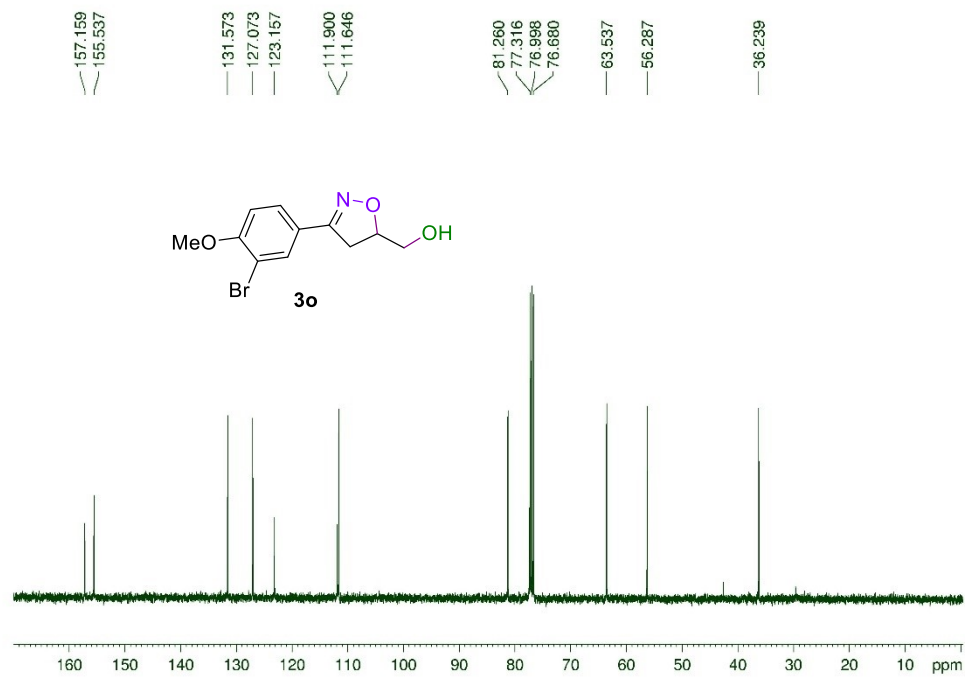

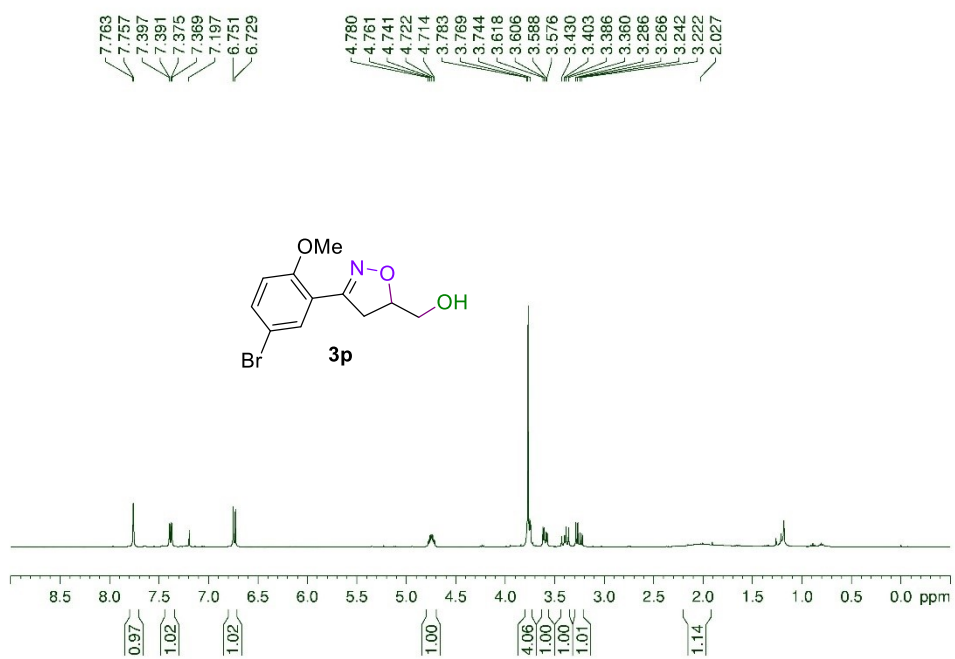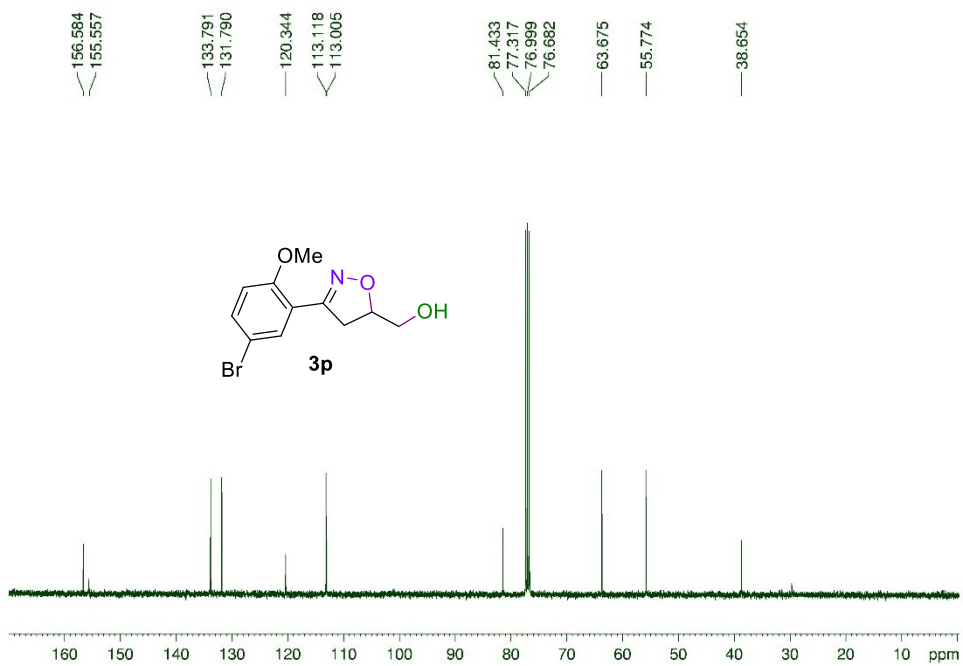

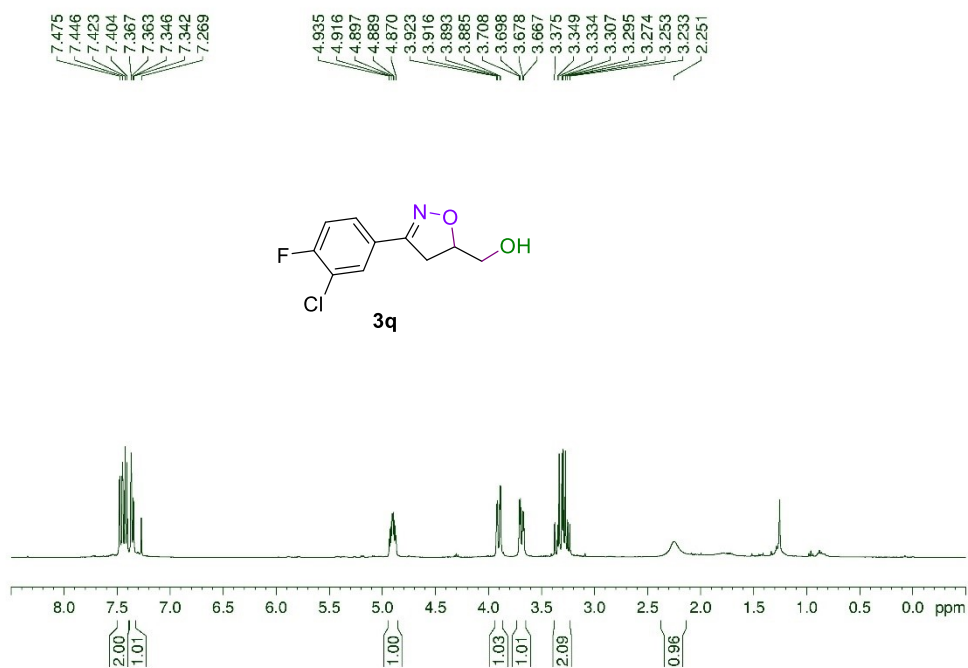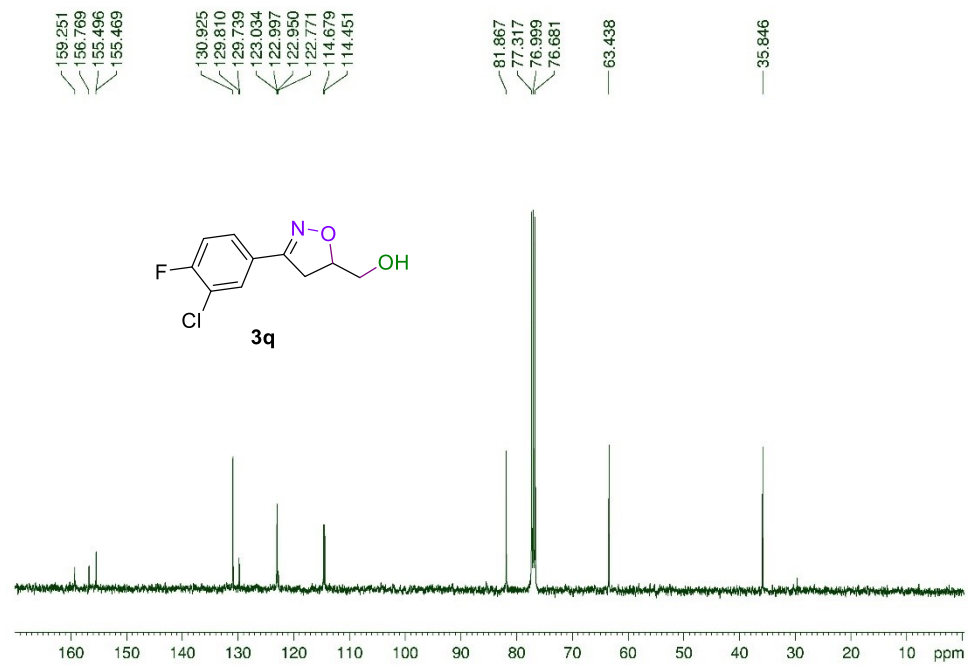

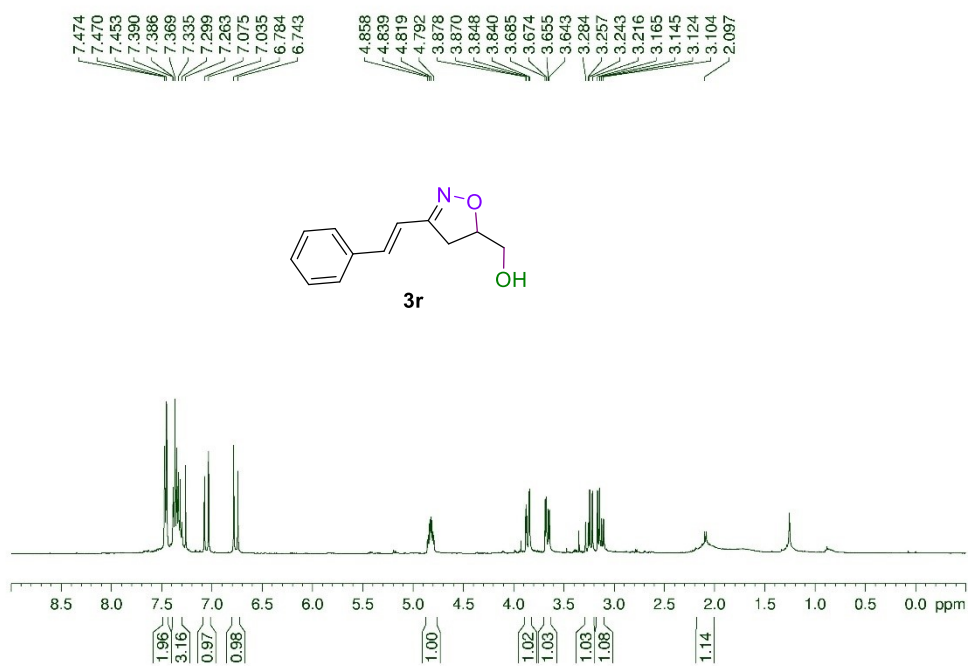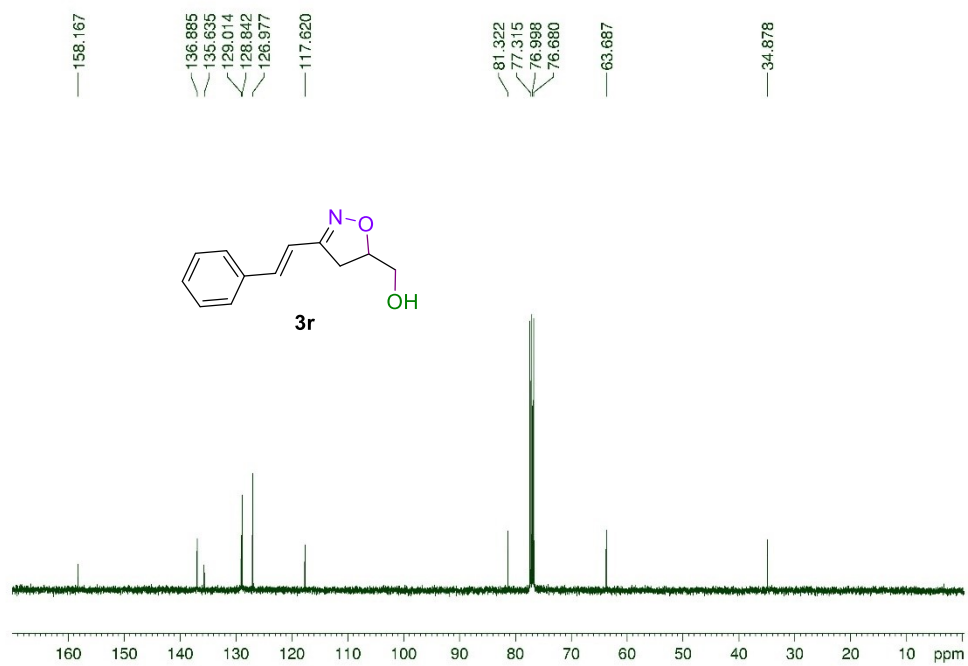

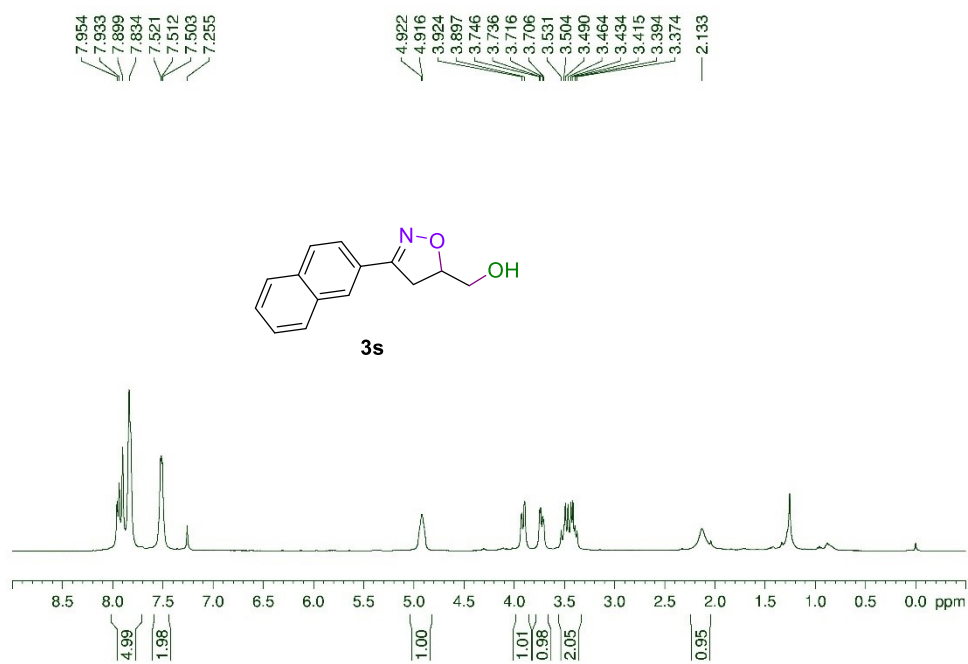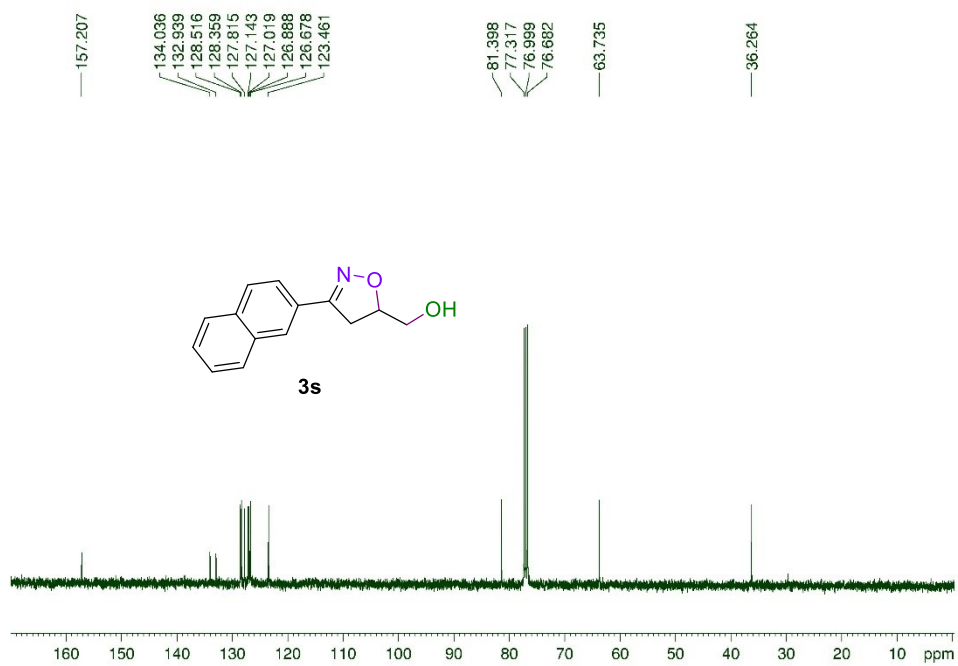

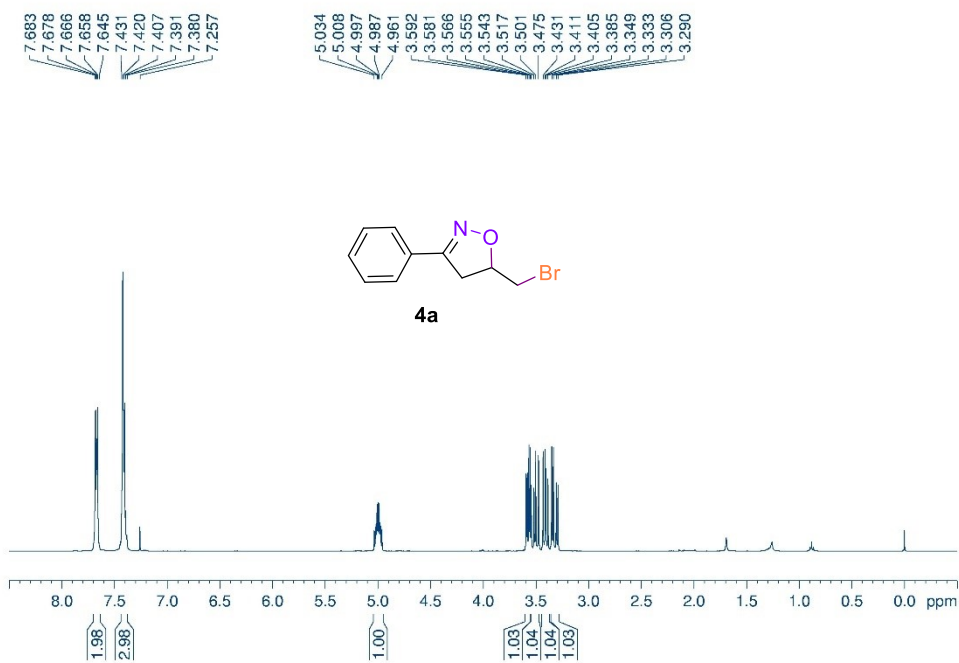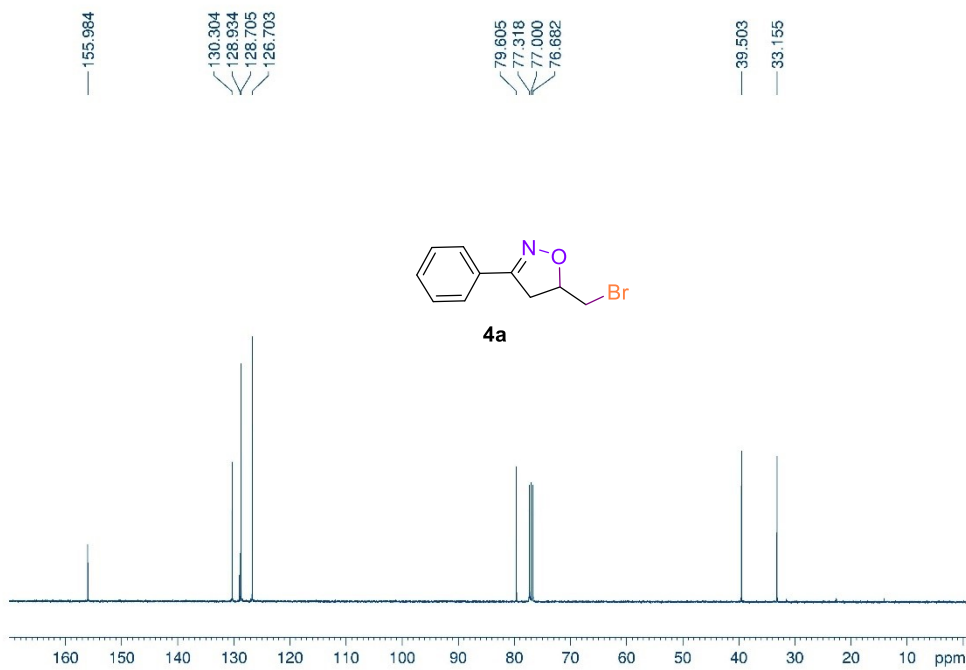

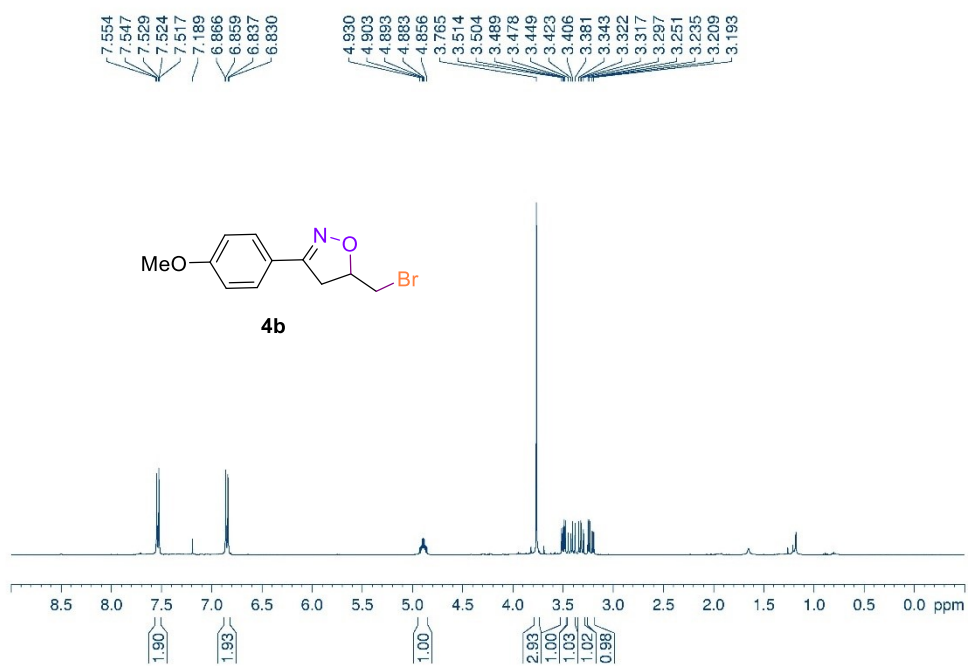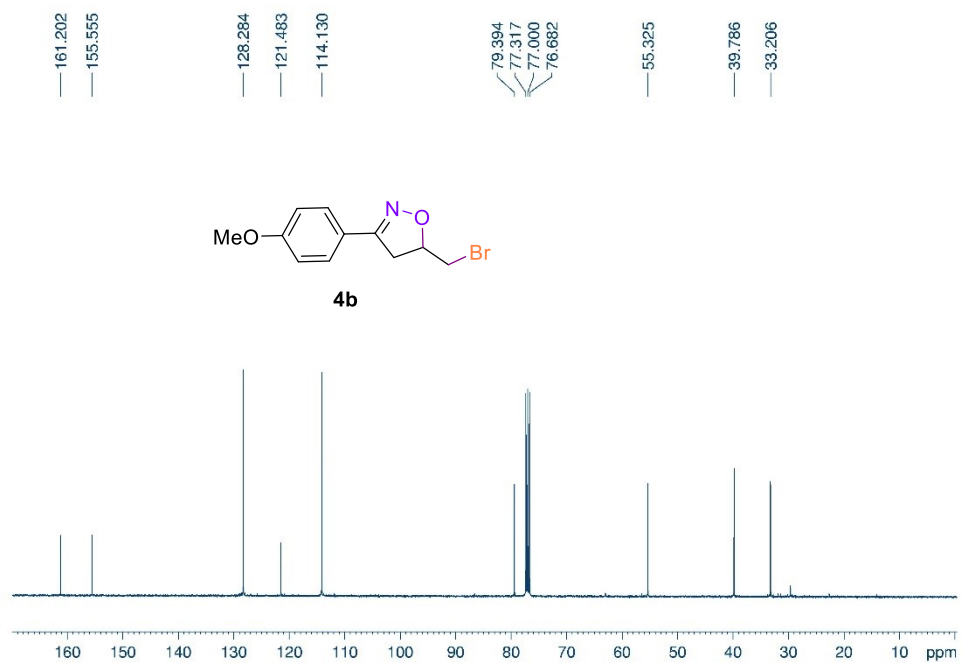



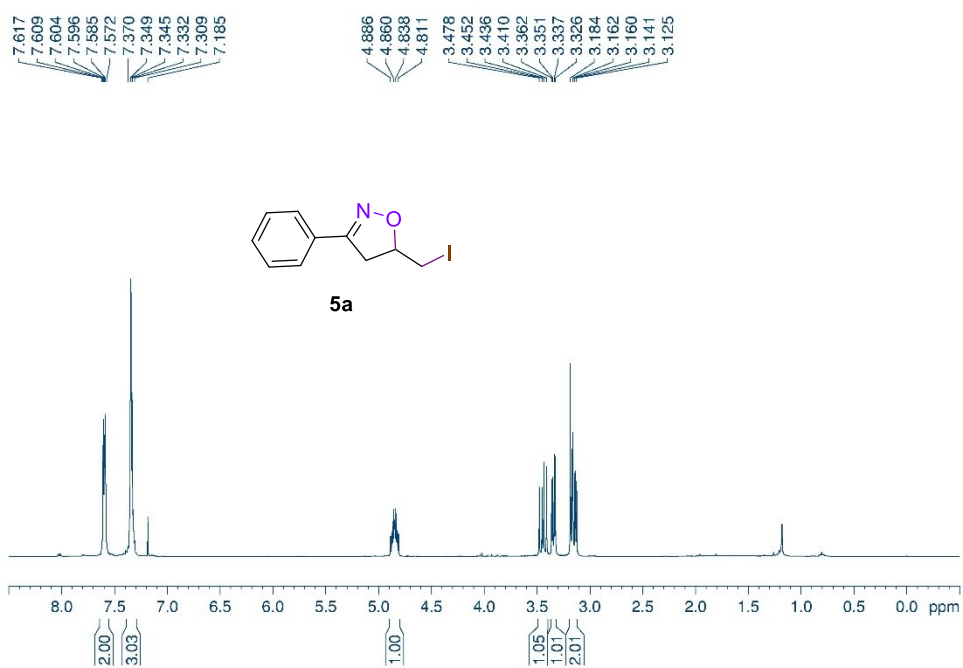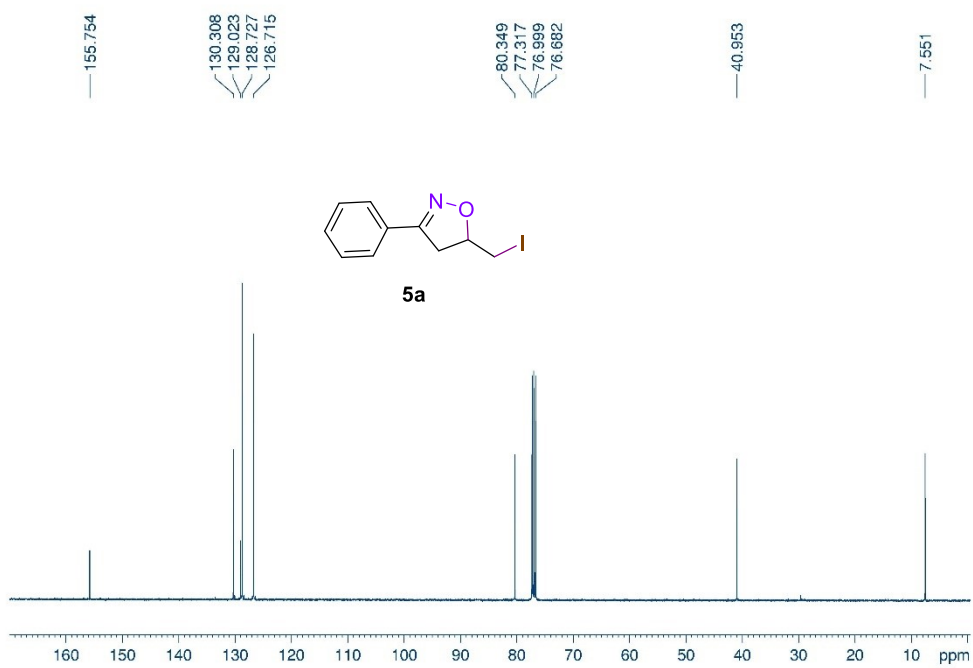

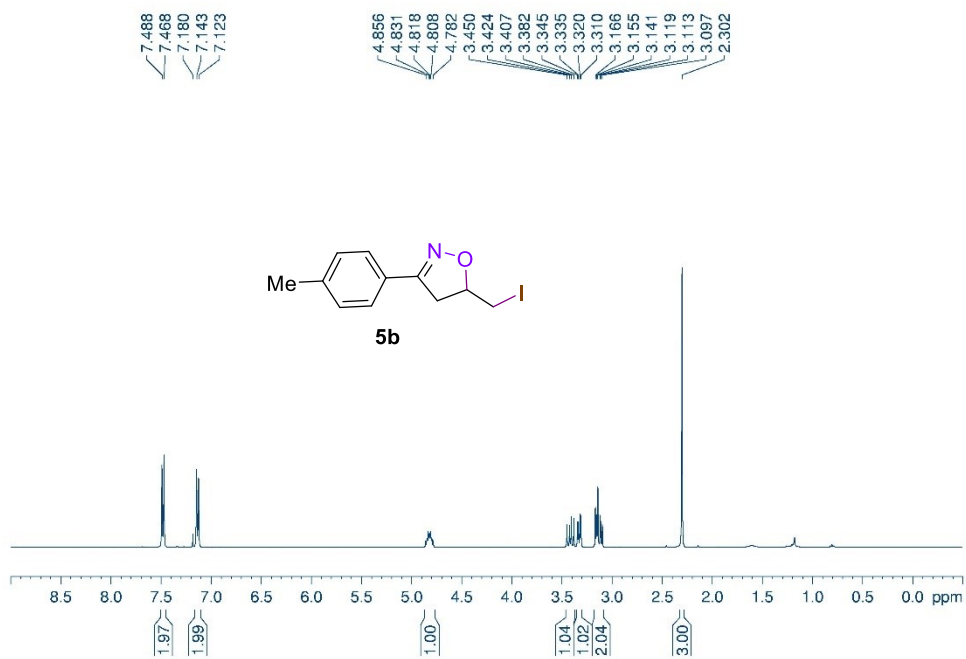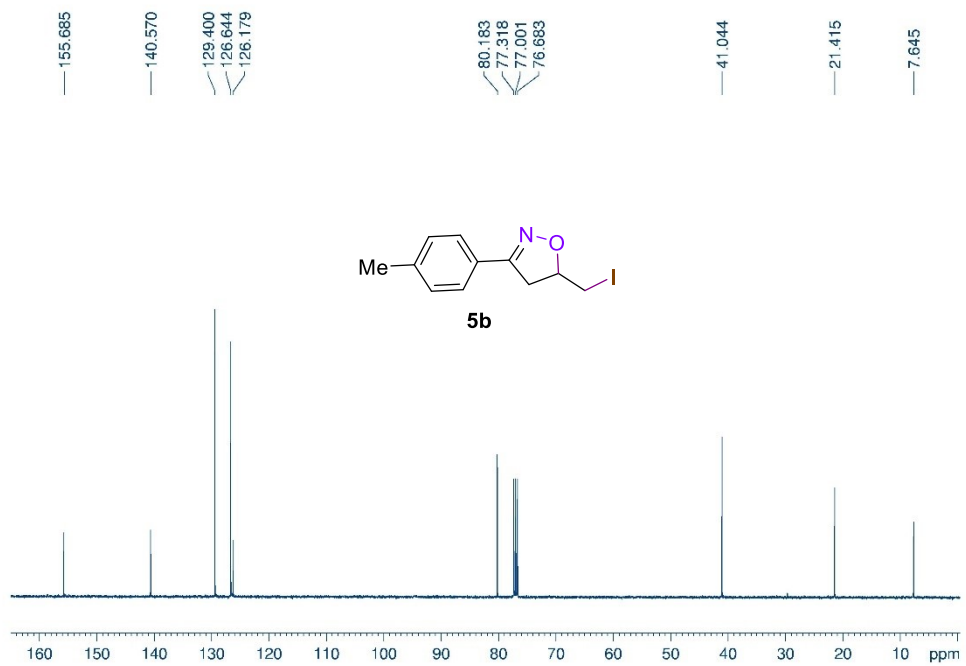

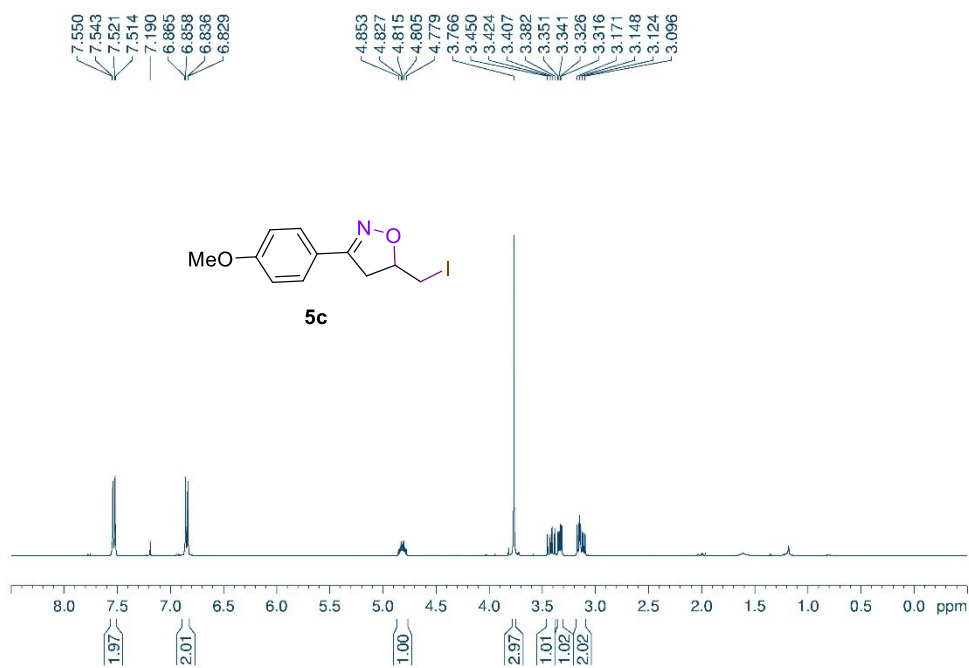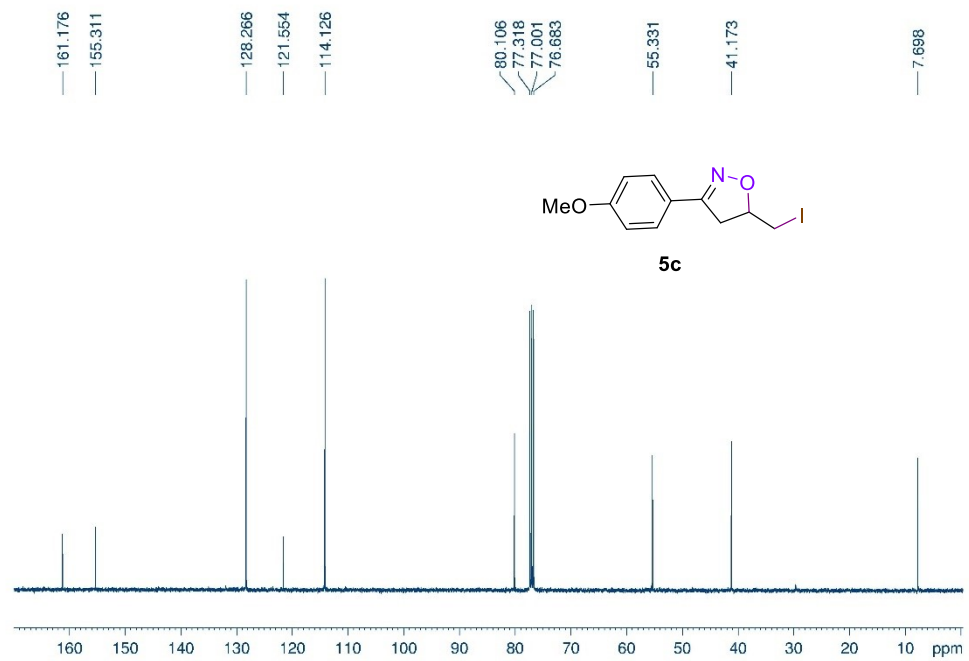

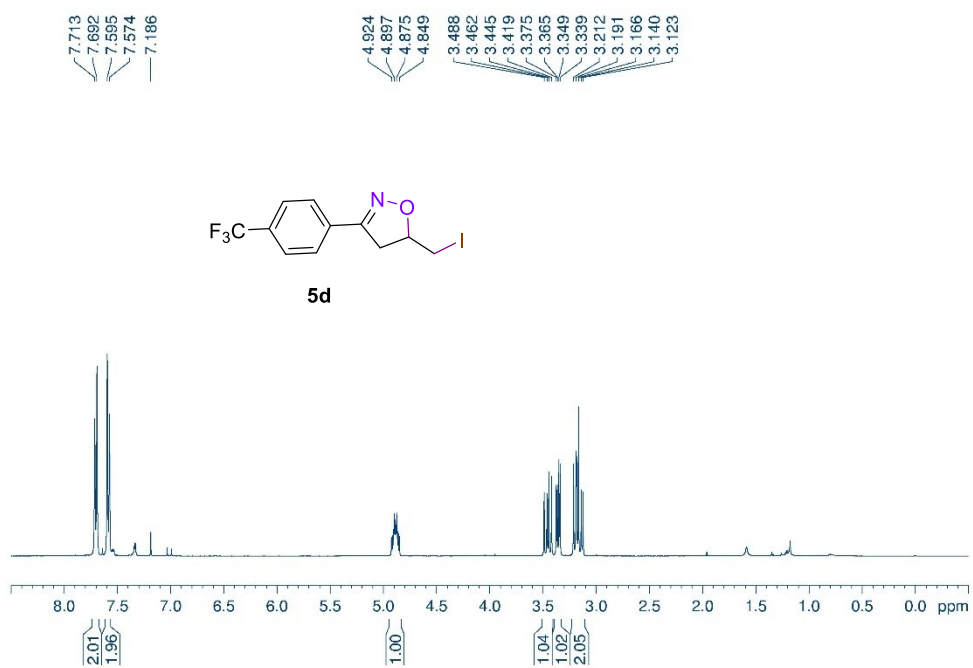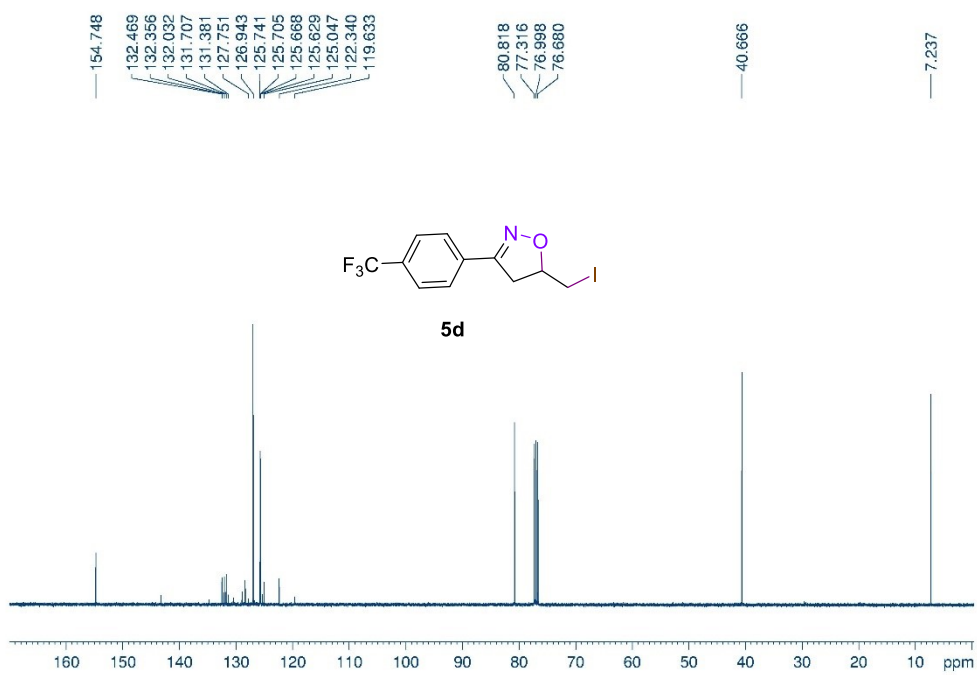

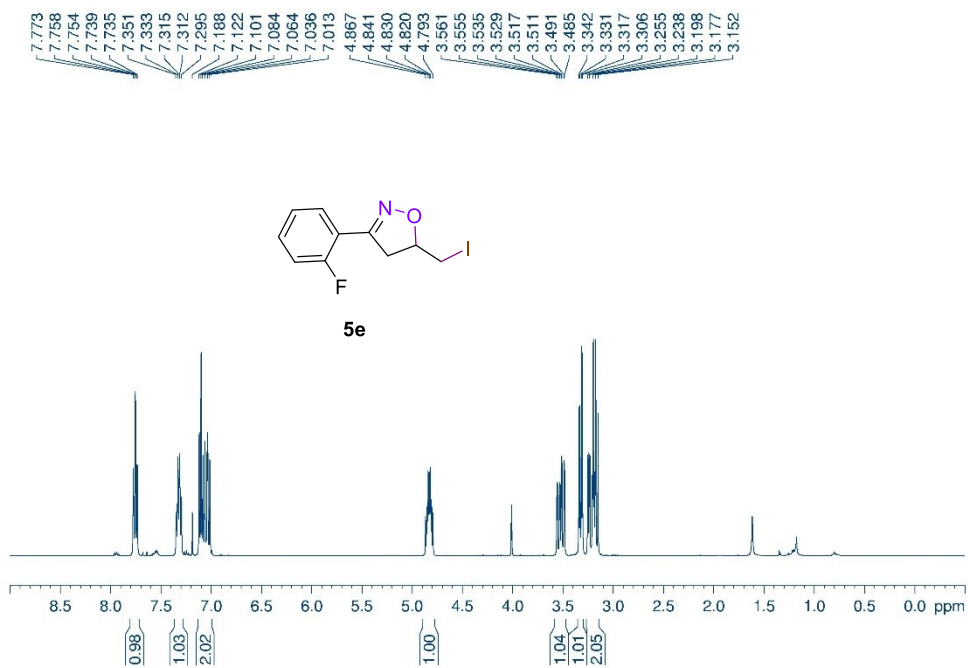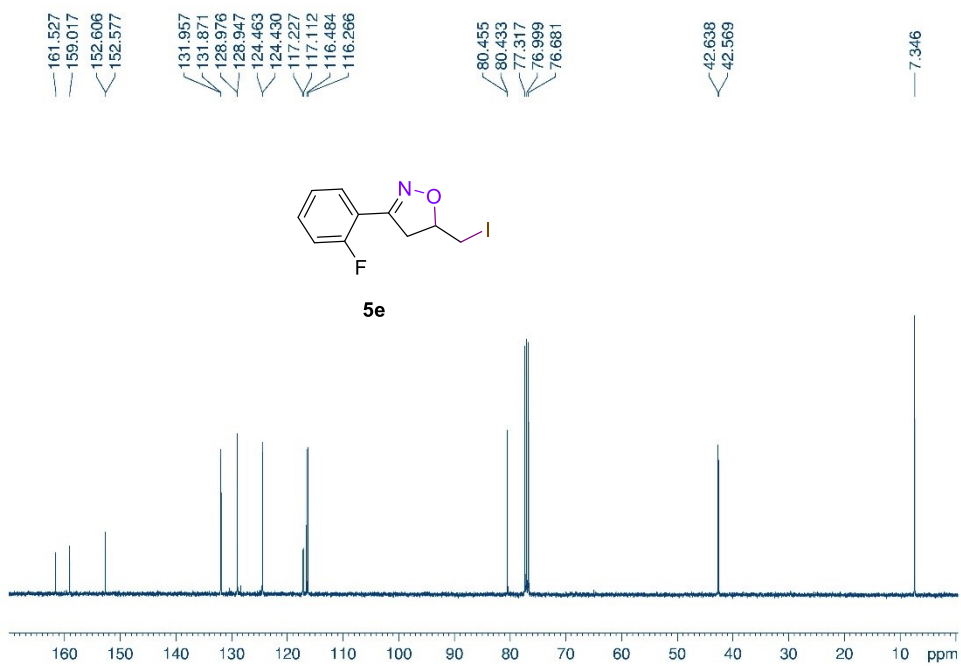

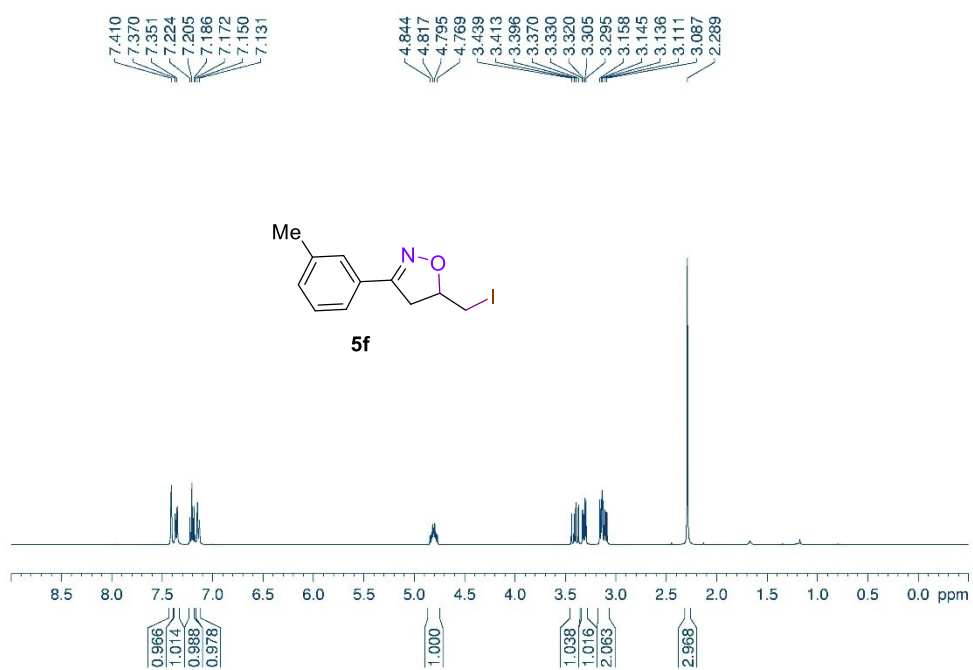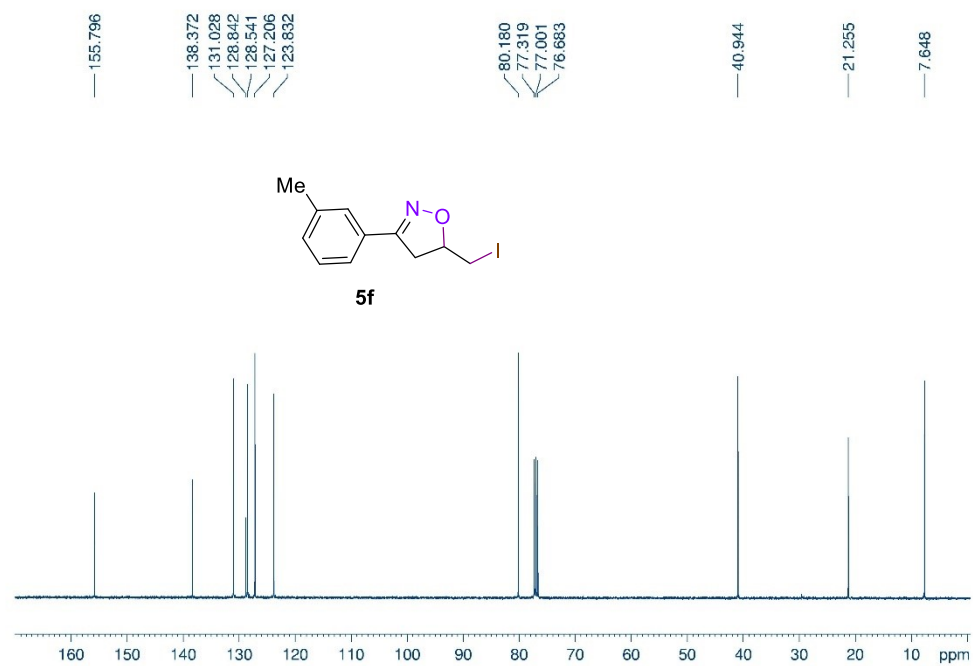

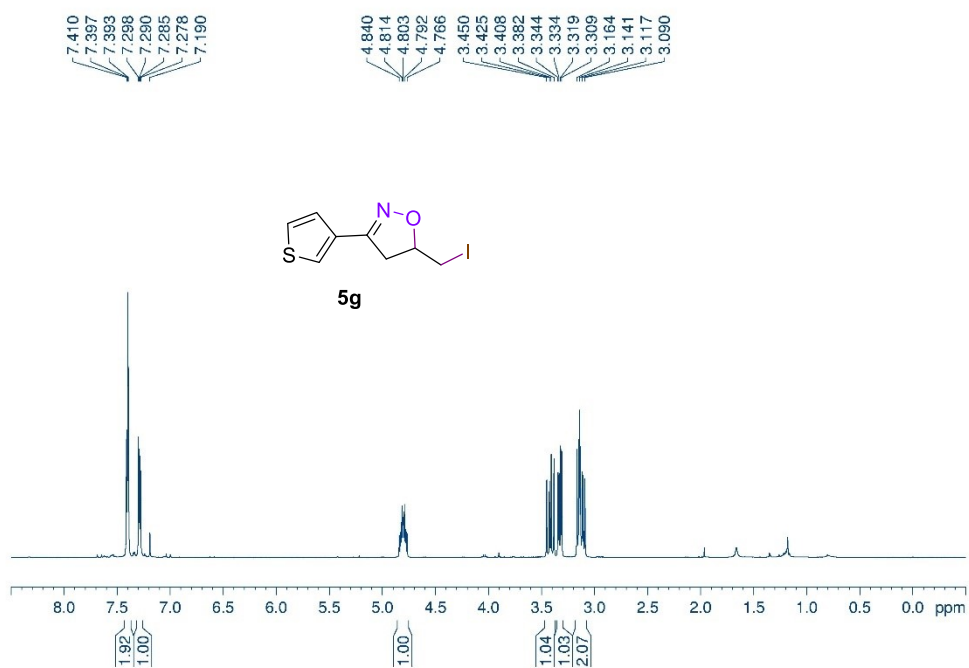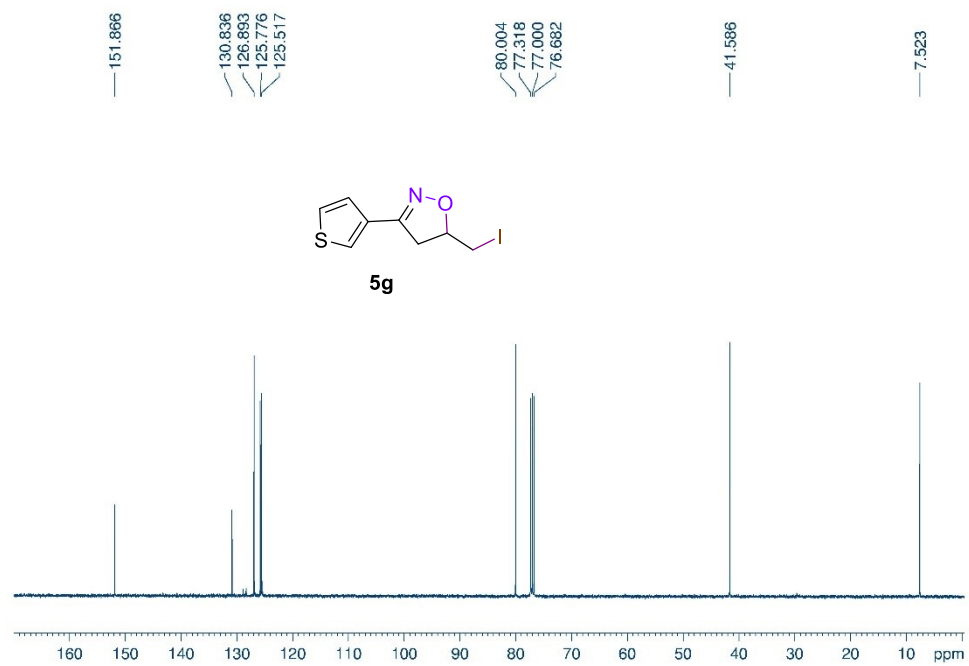

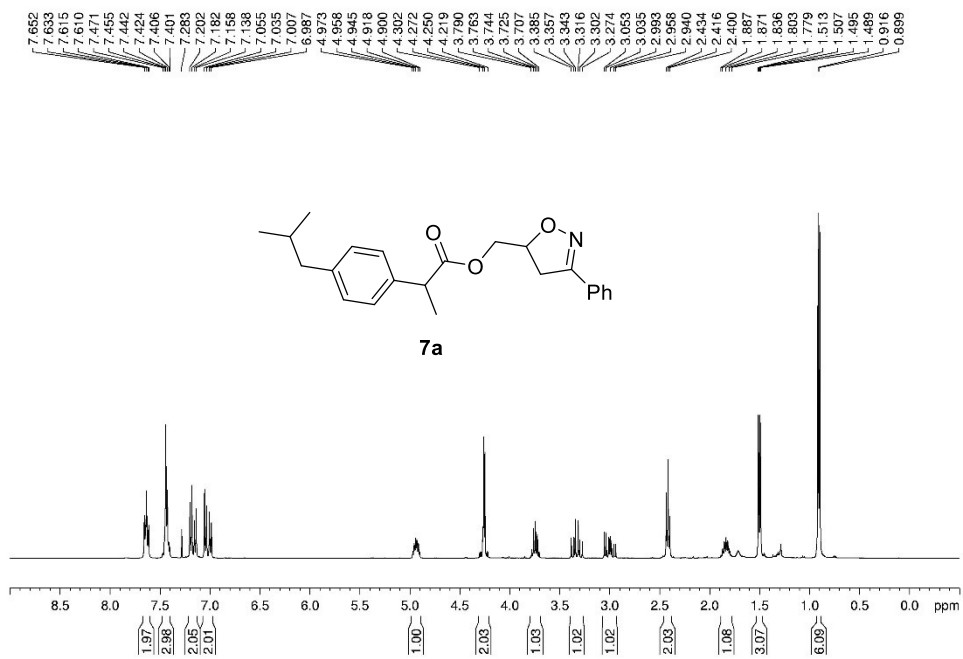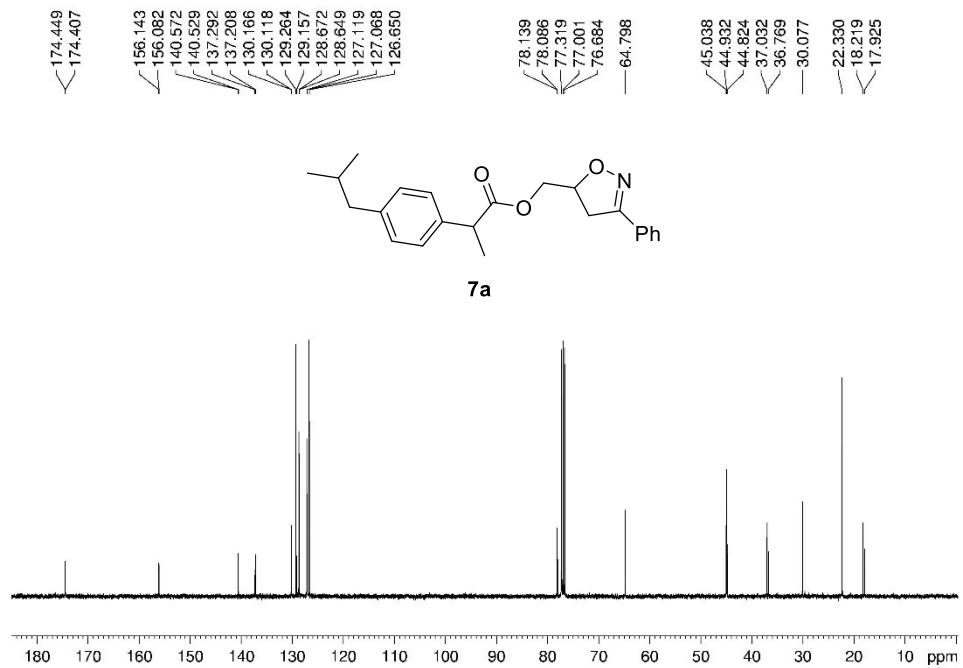

Supplement: d4qo00732h1.pdf [file d4qo00732h1.pdf]
